# Supplementary material for: Gene expression patterns associated with Leishmania panamensis infection in macrophages from BALB/c and C57BL/6 mice
Source: PLoS Negl Trop Dis. 2021 Feb 22;15(2):e0009225. doi: 10.1371/journal.pntd.0009225 (PMC7932533; doi:10.1371/journal.pntd.0009225)
Supplement: S1 Table — (XLSX) [file pntd.0009225.s007.xlsx]

## Sheet: BALBc
Table S1. Genes differentially expressed in BALB/c macrophages
ID	Symbol	Product	Counts (Control)	Counts (Infected)	Log2FC	P value
			(Replicate1, Replicate2, Replicate3)
XR_880075.1	Gm38922	predicted gene, 38922	0,0,0	126,93,98	10.2969	2e-13
NM_010501.2	Ifit3	interferon-induced protein with tetratricopeptide repeats 3	0,0,1	290,228,219	9.34143	1.81e-14
XR_376640.3	Gm32117	predicted gene, 32117	0,0,0	50,66,43	9.11457	1.97e-10
XM_011247152.2	Ifit3	interferon-induced protein with tetratricopeptide repeats 3, transcript variant X2	0,0,0	56,40,56	9.04196	2.91e-10
NM_021384.4	Rsad2	radical S-adenosyl methionine domain containing 2	110,70,113	32192,29308,25993	8.43327	0
NM_001033258.4	Arfgef3	ARFGEF family member 3	0,0,0	33,38,36	8.42051	6.91e-09
NR_045367.2	A630012P03Rik	RIKEN cDNA A630012P03 gene	0,0,0	36,21,33	8.1134	3.9e-08
NR_110496.1	A330074K22Rik	RIKEN cDNA A330074K22 gene	0,0,0	34,21,26	7.92469	9.41e-08
XR_384059.3	Gm33251	predicted gene, 33251	0,0,0	33,30,17	7.89768	1.19e-07
NM_001243092.1	Gm3776	predicted gene 3776	3,0,0	195,199,168	7.57711	5.5e-18
NM_011141.2	Pou3f1	POU domain, class 3, transcription factor 1	4,1,3	451,388,327	7.32062	2.32e-40
NM_008331.3	Ifit1	interferon-induced protein with tetratricopeptide repeats 1	63,50,90	9807,8679,8516	7.26671	0
NM_001122660.1	Gm10639	predicted gene 10639	1,0,0	50,63,51	7.03215	1.72e-08
NM_001101605.1	Ifit1bl1	interferon induced protein with tetratricpeptide repeats 1B like 1, transcript variant 2	0,0,0	22,13,14	6.97172	6.31e-06
NM_133871.2	Ifi44	interferon-induced protein 44	2,0,0	78,85,91	6.89756	1.88e-10
NM_001081746.1	Gm7609	predicted pseudogene 7609	0,0,0	15,17,15	6.8818	7.95e-06
NM_011331.2	Ccl12	chemokine (C-C motif) ligand 12	1,0,0	62,42,43	6.86837	4.58e-08
XR_001784521.1	LOC108168990	uncharacterized LOC108168990, transcript variant X2	40,45,44	4574,4348,3473	6.78969	1.12e-291
NM_008181.3	Gsta1	glutathione S-transferase, alpha 1 (Ya)	6,0,0	289,290,211	6.73669	4.44e-07
XR_875429.2	Gm41348	predicted gene, 41348	0,0,0	9,12,22	6.67149	2.14e-05
NM_015783.3	Isg15	ISG15 ubiquitin-like modifier	54,55,42	4694,4396,3657	6.60056	7.88e-297
NM_008219.3	Hbb-bh1	hemoglobin Z, beta-like embryonic chain	0,0,0	14,8,18	6.54333	3.28e-05
XR_388949.2	LOC102637854	uncharacterized LOC102637854, transcript variant X1	1,0,0	41,31,36	6.37103	4.9e-07
NM_183103.2	Prss46	protease, serine 46	2,1,1	103,118,89	6.30874	1.06e-15
NM_175013.2	Pgm5	phosphoglucomutase 5	1,1,0	46,70,50	6.23931	1.54e-08
XM_017315534.1	Serpinb1c	serine (or cysteine) peptidase inhibitor, clade B, member 1c, transcript variant X2	0,0,0	13,10,11	6.21568	8.85e-05
NM_010510.1	Ifnb1	interferon beta 1, fibroblast	0,0,0	10,15,7	6.06262	0.000156797
NM_023456.3	Npy	neuropeptide Y	127,217,162	9800,10529,8994	6.0535	0
NM_027998.4	Cldn23	claudin 23	0,0,0	12,16,4	6.04176	0.000202048
NM_145226.2	Oas3	2'-5' oligoadenylate synthetase 3	429,443,577	27365,24730,28003	6.00003	0
NM_020557.4	Cmpk2	cytidine monophosphate (UMP-CMP) kinase 2, mitochondrial	147,173,190	10389,8877,7843	5.94087	0
XM_006517419.3	Slc6a19	solute carrier family 6 (neurotransmitter transporter), member 19, transcript variant X1	0,0,0	12,11,7	5.9351	0.000221864
XR_373577.2	Gm33970	predicted gene, 33970	0,0,0	16,8,6	5.93123	0.000254717
NM_010050.3	Dio2	deiodinase, iodothyronine, type II	0,7,7	239,293,228	5.90959	6.02e-41
XR_389502.2	Gm34254	predicted gene, 34254	0,1,0	30,24,23	5.81323	6.15e-06
NM_011452.2	Serpinb9b	serine (or cysteine) peptidase inhibitor, clade B, member 9b	17,18,35	1012,1223,1007	5.72848	2.44e-144
NM_198414.2	Paqr9	progestin and adipoQ receptor family member IX	0,0,0	16,10,2	5.71635	0.000606622
XM_006519924.2	Gm4131	predicted gene 4131	11,8,7	376,422,386	5.68205	6.85e-67
NR_003508.1	Mx2	MX dynamin-like GTPase 2, transcript variant 2	55,66,76	3136,2918,2699	5.67852	2.83e-272
XM_006520799.3	Apol9a	apolipoprotein L 9a, transcript variant X1	0,0,0	8,12,7	5.67783	0.000454833
NM_001190461.1	Hilpda	hypoxia inducible lipid droplet associated, transcript variant 1	1,0,3	54,88,50	5.57869	1.28e-11
NR_038116.1	Cxcl11	chemokine (C-X-C motif) ligand 11, transcript variant 1, non-coding	0,0,2	55,34,19	5.57334	1.42e-06
NR_003520.1	Mx1	MX dynamin-like GTPase 1, transcript variant 2	181,194,236	9276,7815,7599	5.54668	0
NM_008630.2	Mt2	metallothionein 2	274,291,256	10315,13358,9354	5.52727	0
XM_017316039.1	Dusp13	dual specificity phosphatase 13, transcript variant X3	0,0,0	4,14,7	5.43582	0.000973919
NM_009621.5	Adamts1	a disintegrin-like and metallopeptidase (reprolysin type) with thrombospondin type 1 motif, 1	33,27,25	904,1105,930	5.30259	1.63e-144
NM_023784.5	Yipf7	Yip1 domain family, member 7	0,0,2	38,29,22	5.26688	4.73e-06
NM_199015.4	Phf11d	PHD finger protein 11D	358,377,377	13525,11743,11643	5.25987	0
XR_873211.2	Gm36099	predicted gene, 36099	4,5,0	102,131,89	5.25105	2e-20
XR_878696.2	Gm13822	predicted gene 13822	4,9,4	198,178,190	5.20372	5.43e-36
XM_006526997.1	Ubtd1	ubiquitin domain containing 1, transcript variant X1	0,0,0	6,4,12	5.12698	0.00190651
NM_013654.3	Ccl7	chemokine (C-C motif) ligand 7	61,61,45	1876,2021,1184	5.11927	9.91e-127
NM_010612.2	Kdr	kinase insert domain protein receptor	2,3,2	89,66,66	5.04731	5e-15
XR_871809.1	Gm40685	predicted gene, 40685	0,0,0	12,3,6	5.02344	0.00248057
NM_011407.1	Slfn1	schlafen 1	295,325,373	10312,8648,8881	5.0195	0
NM_001005858.3	Ifit3b	interferon-induced protein with tetratricopeptide repeats 3B	0,1,0	13,19,17	5.01099	0.000135004
NM_001243857.1	Fam124a	family with sequence similarity 124, member A	1,0,0	12,19,18	5.00872	0.000139083
NM_008317.4	Hyal1	hyaluronoglucosaminidase 1	103,58,125	2448,2908,2560	4.99504	2.83e-194
XM_006521418.3	Apol9b	apolipoprotein L 9b, transcript variant X1	0,0,2	29,22,24	4.98529	1.69e-05
XR_874911.1	Gm41235	predicted gene, 41235	16,13,21	423,472,444	4.92778	1.27e-81
XR_001778572.1	Gm33052	predicted gene, 33052	1,0,0	12,16,16	4.81812	0.000258835
NM_011909.2	Usp18	ubiquitin specific peptidase 18	407,496,499	12372,11150,10458	4.80535	0
NM_198095.2	Bst2	bone marrow stromal cell antigen 2	1621,1697,1484	41313,37784,32791	4.74317	2.29e-293
NM_053085.2	Tcf23	transcription factor 23	0,0,0	4,7,8	4.73025	0.00388207
NM_153054.2	Slc18a1	solute carrier family 18 (vesicular monoamine), member 1	0,0,0	5,10,4	4.71983	0.00406913
NM_031367.1	Ifi44l	interferon-induced protein 44 like	270,348,333	8084,6374,6991	4.70053	3.82e-238
XM_006516685.2	Serpinb1b	serine (or cysteine) peptidase inhibitor, clade B, member 1b, transcript variant X2	4,4,0	60,66,73	4.6892	3.43e-14
XR_880743.1	Gm33834	predicted gene, 33834	2,1,0	30,23,32	4.67047	1.73e-06
NM_134247.3	Acot4	acyl-CoA thioesterase 4	3,2,0	41,45,40	4.62792	2.14e-09
NM_021443.3	Ccl8	chemokine (C-C motif) ligand 8	1,0,3	40,45,19	4.62209	1.76e-07
XR_381188.3	Cmpk2	cytidine monophosphate (UMP-CMP) kinase 2, mitochondrial, transcript variant X1	0,0,1	21,8,9	4.54516	0.00074254
XR_383705.3	Gm34643	predicted gene, 34643	20,17,17	358,338,372	4.48811	1.96e-67
XR_872827.1	Gm39473	predicted gene, 39473	0,0,1	10,12,13	4.38657	0.00099688
NM_153511.3	Il1f9	interleukin 1 family, member 9	4,4,5	71,105,68	4.32636	3.65e-17
NM_177709.3	Tusc5	tumor suppressor candidate 5	0,1,0	11,15,8	4.3053	0.00123285
NM_001162938.1	Pydc3	pyrin domain containing 3	16,13,16	303,238,234	4.28406	4e-47
NM_010357.3	Gsta4	glutathione S-transferase, alpha 4	29,20,30	486,473,369	4.26154	2.69e-70
NM_010531.1	Il18bp	interleukin 18 binding protein	223,195,282	4468,3510,3565	4.25407	1.47e-173
NM_025929.2	2010109I03Rik	RIKEN cDNA 2010109I03 gene	0,0,2	23,11,15	4.24085	0.000422402
XR_386561.3	Gm31208	predicted gene, 31208	14,22,15	304,257,292	4.23912	2.06e-52
NM_001110517.1	Ifit1bl1	interferon induced protein with tetratricpeptide repeats 1B like 1, transcript variant 1	0,1,0	13,14,6	4.23894	0.00152813
NM_029803.3	Ifi27l2a	interferon, alpha-inducible protein 27 like 2A, transcript variant 1	174,259,149	3392,3125,3009	4.22078	2.52e-129
NM_021394.2	Zbp1	Z-DNA binding protein 1, transcript variant 1	312,331,421	5927,5418,5171	4.16484	2.22e-227
NM_011171.2	Procr	protein C receptor, endothelial	107,121,103	1873,1665,1590	4.15301	6.14e-160
NR_040520.1	2310069B03Rik	RIKEN cDNA 2310069B03 gene	3,0,0	20,20,22	4.13092	4.51e-05
NM_010186.5	Fcgr1	Fc receptor, IgG, high affinity I	1003,913,1053	16521,13404,13622	4.08173	1.19e-233
XR_379475.3	Peak1os	pseudopodium-enriched atypical kinase 1, opposite strand, transcript variant X3	6,3,6	70,71,84	4.00926	2.27e-16
NM_008012.1	Akr1b8	aldo-keto reductase family 1, member B8	257,239,250	3371,3300,3083	3.91203	1.4e-225
XR_872952.1	Gm40560	predicted gene, 40560	3,7,2	56,47,68	3.89056	3.44e-12
XR_390362.2	4930430E12Rik	RIKEN cDNA 4930430E12 gene	35,29,38	470,445,408	3.88848	4.32e-73
NM_011333.3	Ccl2	chemokine (C-C motif) ligand 2	477,412,399	5431,6530,4382	3.86189	1.33e-147
XM_006532672.3	Sphk1	sphingosine kinase 1, transcript variant X5	0,2,0	18,14,8	3.82443	0.00156093
NM_019949.2	Ube2l6	ubiquitin-conjugating enzyme E2L 6	673,747,712	9240,8518,8121	3.80475	3.9e-228
NM_023386.5	Rtp4	receptor transporter protein 4	13,17,14	188,168,192	3.80292	1.14e-35
XM_006509253.3	Slc7a2	solute carrier family 7 (cationic amino acid transporter, y+ system), member 2, transcript variant X4	1,0,0	6,10,11	3.79857	0.00416928
NM_022420.2	Gprc5b	G protein-coupled receptor, family C, group 5, member B, transcript variant 2	361,351,336	4168,4324,4075	3.78509	3.12e-241
NM_008768.2	Orm1	orosomucoid 1	8,13,10	137,144,103	3.77539	1.06e-24
NM_020581.2	Angptl4	angiopoietin-like 4	259,411,267	3819,3600,3827	3.77311	2.81e-117
XM_006532248.2	H3f3b	H3 histone, family 3B, transcript variant X1	26,26,26	326,284,316	3.76278	7.94e-55
NM_001317404.1	Clcn7	chloride channel, voltage-sensitive 7, transcript variant 2	1,0,1	9,17,12	3.74589	0.00186933
NM_008607.2	Mmp13	matrix metallopeptidase 13	304,352,357	3744,4373,3689	3.74285	4.26e-207
NM_001081143.1	Gnat3	guanine nucleotide binding protein, alpha transducing 3	9,15,13	147,144,142	3.70336	9.69e-29
XR_871905.1	Gm40723	predicted gene, 40723, transcript variant X2	5,8,2	67,59,59	3.70091	5.48e-13
NM_008806.2	Pde6b	phosphodiesterase 6B, cGMP, rod receptor, beta polypeptide	1,0,0	5,13,8	3.68794	0.00536776
NM_013653.3	Ccl5	chemokine (C-C motif) ligand 5	308,359,347	4417,3622,3115	3.66255	4.5e-126
NM_013603.2	Mt3	metallothionein 3	18,11,8	129,164,119	3.62007	3.85e-25
NM_001024721.2	BC094916	cDNA sequence BC094916	129,142,182	1541,1563,1686	3.60385	1.85e-149
NM_026214.3	Kctd4	potassium channel tetramerisation domain containing 4	1,0,2	11,19,16	3.60284	0.000524657
NM_001039701.3	Il1rn	interleukin 1 receptor antagonist, transcript variant 2	22,7,25	184,179,208	3.57126	7.38e-32
NM_030150.2	Dhx58	DEXH (Asp-Glu-X-His) box polypeptide 58	691,683,697	7296,6913,6815	3.54719	4.48e-235
NM_008029.3	Flt4	FMS-like tyrosine kinase 4	60,46,63	620,557,545	3.54514	1.5e-79
NM_183029.2	Igf2bp2	insulin-like growth factor 2 mRNA binding protein 2	293,315,326	2976,3385,3122	3.54409	6.79e-212
NM_011670.2	Uchl1	ubiquitin carboxy-terminal hydrolase L1	16,7,5	108,99,92	3.54302	1.3e-18
NM_019471.3	Mmp10	matrix metallopeptidase 10	1,0,0	7,9,8	3.53624	0.00686887
NR_045747.1	Mirt2	myocardial infraction associated transcript 2	5,5,7	74,69,42	3.53274	2.7e-12
XR_378865.2	Gm29243	predicted gene 29243	0,0,2	16,8,10	3.52988	0.00380828
NM_025998.3	Nkain1	Na+/K+ transporting ATPase interacting 1	4,0,1	18,29,18	3.52476	4.26e-05
XR_387275.3	Gm36102	predicted gene, 36102, transcript variant X2	2,0,0	9,16,9	3.48962	0.00394128
NM_010999.2	Olfr56	olfactory receptor 56	7,4,4	52,66,42	3.4801	4.43e-11
NM_023516.5	Hilpda	hypoxia inducible lipid droplet associated, transcript variant 2	13,5,10	73,112,102	3.47957	4.44e-18
XR_867296.2	Gm40051	predicted gene, 40051	2,0,2	13,24,16	3.47723	0.000206034
XM_017320832.1	Dok7	docking protein 7, transcript variant X4	7,1,2	31,51,30	3.4702	1.04e-07
NM_001139519.1	Zbp1	Z-DNA binding protein 1, transcript variant 2	40,23,28	326,243,318	3.46444	6.46e-43
NM_013743.2	Pdk4	pyruvate dehydrogenase kinase, isoenzyme 4	81,113,86	889,891,887	3.44299	7.61e-98
NM_029809.2	Rnf225	ring finger protein 225	2,1,7	48,30,28	3.40945	2.69e-07
NM_022982.2	Rtn4r	reticulon 4 receptor	7,8,12	81,105,77	3.40852	3.8e-17
NM_010442.2	Hmox1	heme oxygenase 1	15755,13241,12773	120085,143739,119073	3.40084	1.16e-174
XM_017320505.1	Spocd1	SPOC domain containing 1, transcript variant X1	0,1,0	4,9,10	3.36532	0.00939067
NM_145211.2	Oas1a	2'-5' oligoadenylate synthetase 1A	11,5,15	106,93,89	3.35464	6.6e-18
NM_053217.2	Ifit1bl2	interferon induced protein with tetratricopeptide repeats 1B like 2	0,4,0	15,15,20	3.32263	0.000483188
NM_080470.1	Smc1b	structural maintenance of chromosomes 1B	2,4,5	40,34,34	3.30876	6.57e-08
XM_006541030.2	Isg20	interferon-stimulated protein, transcript variant X3	2,3,3	16,35,32	3.29314	4.25e-06
NM_172812.2	Htr2a	5-hydroxytryptamine (serotonin) receptor 2A	5,6,6	49,54,55	3.28972	4.01e-11
NM_027395.2	Basp1	brain abundant, membrane attached signal protein 1	1171,1134,1163	9680,10662,8610	3.26353	3.52e-180
NM_053110.4	Gpnmb	glycoprotein (transmembrane) nmb	10871,11372,11162	90444,91937,92305	3.24327	4.4e-256
XR_385080.3	Gm31407	predicted gene, 31407	2,2,0	16,17,13	3.21283	0.000630385
NR_131195.1	Ttc39aos1	Ttc39a opposite strand RNA 1	3,5,5	39,41,38	3.21222	1.75e-08
NM_176933.4	Dusp4	dual specificity phosphatase 4	98,61,91	584,779,652	3.20056	3.62e-70
NM_007426.4	Angpt2	angiopoietin 2	24,32,16	197,213,182	3.19903	7.55e-31
NM_146936.1	Olfr1417	olfactory receptor 1417	2,0,2	18,16,11	3.19084	0.000779692
NM_007423.4	Afp	alpha fetoprotein	80,62,50	524,566,446	3.18358	1.68e-56
XM_006501475.2	Zfp697	zinc finger protein 697, transcript variant X2	2,1,0	10,15,12	3.16258	0.00246838
XM_006529416.2	Zranb3	zinc finger, RAN-binding domain containing 3, transcript variant X9	62,86,72	742,508,470	3.1554	2.56e-46
NM_145134.3	Spsb4	splA/ryanodine receptor domain and SOCS box containing 4	133,101,119	905,989,838	3.1484	1.88e-91
NM_153098.3	Cd109	CD109 antigen	44,47,62	361,442,388	3.14678	1.96e-56
NR_126529.1	Oas1g	2'-5' oligoadenylate synthetase 1G, transcript variant 2	4,2,2	23,23,29	3.14513	1.04e-05
NM_001039646.2	Gbp10	guanylate-binding protein 10	512,324,541	3759,3232,3412	3.12308	2.96e-91
NM_009690.2	Cd5l	CD5 antigen-like	4292,5730,5092	39399,37225,37087	3.11109	2.86e-134
NM_152804.2	Plk2	polo-like kinase 2	1895,1927,1962	12997,16023,13393	3.07346	7.46e-183
NM_080555.2	Plpp3	phospholipid phosphatase 3	305,306,343	2088,2531,2296	3.05669	2.27e-148
NM_015811.2	Rgs1	regulator of G-protein signaling 1	902,1046,1004	6912,7682,6775	3.05646	2.27e-164
NM_008207.3	H2-T24	histocompatibility 2, T region locus 24	789,1030,1029	6863,6385,7209	3.04283	6.04e-130
XR_001778248.1	Trim30c	tripartite motif-containing 30C, transcript variant X3	2,3,3	22,28,20	3.03072	2.59e-05
NM_175026.3	Pyhin1	pyrin and HIN domain family, member 1	770,829,874	5930,5032,5505	2.9389	8.49e-135
XM_011241060.2	Fam71f2	family with sequence similarity 71, member F2, transcript variant X1	10,13,16	86,104,83	2.93856	5.42e-16
XR_881402.1	Gm42312	predicted gene, 42312, transcript variant X1	3,1,0	15,13,12	2.93435	0.00209326
XM_006531442.2	Mlkl	mixed lineage kinase domain-like, transcript variant X1	12,10,3	65,54,62	2.93186	1.84e-10
NM_025992.2	Herc6	hect domain and RLD 6	614,633,858	4855,4282,4743	2.9274	1.04e-112
NM_021427.2	Fam181b	family with sequence similarity 181, member B	6,6,4	41,47,31	2.9224	8.64e-08
NM_172648.3	Ifi205	interferon activated gene 205	166,227,202	1632,1110,1165	2.90999	2.32e-56
XM_006530752.3	Mt1	metallothionein 1, transcript variant X1	7,2,7	44,39,34	2.90491	1.52e-07
NM_009099.2	Trim30a	tripartite motif-containing 30A	40,19,36	176,194,257	2.8869	7.25e-27
NM_001081446.1	Iqck	IQ motif containing K	34,43,37	245,265,233	2.87909	2.84e-36
NM_011412.3	Slit3	slit homolog 3 (Drosophila)	8,9,11	36,89,69	2.8633	3.43e-10
NM_153518.1	Ccdc65	coiled-coil domain containing 65	6,0,2	19,20,25	2.84129	0.000178984
NM_011426.3	Siglec1	sialic acid binding Ig-like lectin 1, sialoadhesin	350,328,335	2292,1819,2193	2.83755	4.08e-95
XR_001781627.1	Gm36193	predicted gene, 36193, transcript variant X8	60,45,79	379,355,417	2.83452	6.35e-45
NM_007906.2	Eef1a2	eukaryotic translation elongation factor 1 alpha 2	81,74,60	454,474,417	2.82938	2.87e-51
XR_871904.2	Gm40723	predicted gene, 40723, transcript variant X1	4,2,5	22,28,31	2.82925	1.19e-05
XR_140605.4	4930589L23Rik	RIKEN cDNA 4930589L23 gene	22,9,13	101,82,102	2.82545	8.43e-15
NM_144539.5	Slamf7	SLAM family member 7	247,219,282	1581,1491,1513	2.81865	8.49e-105
NR_030692.1	A930011G23Rik	RIKEN cDNA A930011G23 gene	7,4,6	42,32,43	2.81737	1.55e-07
XM_006496391.3	LOC102637269	protein transport protein Sec61 subunit gamma	0,1,0	8,8,3	2.80719	0.0202682
NM_134250.2	Havcr2	hepatitis A virus cellular receptor 2	27,16,23	165,121,126	2.80015	1.05e-19
NM_010174.1	Fabp3	fatty acid binding protein 3, muscle and heart	490,558,489	3333,3047,2756	2.76879	2.36e-94
XM_011249084.2	Xaf1	XIAP associated factor 1, transcript variant X6	33,19,24	117,153,186	2.73254	1.42e-20
NR_028586.1	Gm11978	predicted gene 11978	9,3,4	40,25,41	2.72742	2.17e-06
NM_026835.2	Ms4a6d	membrane-spanning 4-domains, subfamily A, member 6D	5555,4713,4495	30660,25864,28055	2.71822	1.72e-101
XM_006497777.3	Npdc1	neural proliferation, differentiation and control 1, transcript variant X1	1,0,2	7,10,13	2.71503	0.00917417
NM_178796.6	A530064D06Rik	RIKEN cDNA A530064D06 gene, transcript variant 1	23,21,29	149,141,138	2.71405	5.32e-22
NM_008871.2	Serpine1	serine (or cysteine) peptidase inhibitor, clade E, member 1	236,181,181	1051,1332,1041	2.70665	1.14e-67
NM_024406.2	Fabp4	fatty acid binding protein 4, adipocyte	224,305,291	1622,1545,1483	2.69993	2.03e-79
NR_040442.1	AV051173	expressed sequence AV051173	2286,2048,2071	13191,11767,10912	2.69365	3.08e-108
NM_013657.5	Sema3c	sema domain, immunoglobulin domain (Ig), short basic domain, secreted, (semaphorin) 3C	77,94,105	506,572,486	2.69293	1.5e-54
NM_027835.3	Ifih1	interferon induced with helicase C domain 1, transcript variant 1	9,7,9	50,51,52	2.69188	2.79e-09
NM_011150.2	Lgals3bp	lectin, galactoside-binding, soluble, 3 binding protein	13463,11027,11719	69933,67824,64902	2.68665	5.21e-128
XM_006530330.3	Oas1a	2'-5' oligoadenylate synthetase 1A, transcript variant X1	1,4,1	14,18,15	2.6841	0.00122776
NM_001135115.1	Gm12250	predicted gene 12250	313,268,420	2024,1722,1785	2.67142	7.12e-71
XR_374396.3	Bcl2l1	BCL2-like 1, transcript variant X5	0,1,0	6,6,6	2.66781	0.0231625
XM_017313704.1	Nrg4	neuregulin 4, transcript variant X1	10,11,11	63,67,58	2.65552	7.87e-11
XR_870872.1	Ankdd1a	ankyrin repeat and death domain containing 1A, transcript variant X9	8,12,6	47,48,60	2.6385	8.1e-09
NM_025458.2	Tmed6	transmembrane emp24 protein transport domain containing 6	2,0,0	11,4,9	2.63004	0.022009
NM_008132.2	Glrp1	glutamine repeat protein 1	25,17,33	143,151,121	2.62801	3.4e-19
NR_045932.1	Slfn5os	schlafen 5, opposite strand	33,18,36	134,165,180	2.62004	3.96e-21
NM_001080940.1	Angptl8	angiopoietin-like 8	2,4,4	20,22,24	2.61298	0.000125296
XM_006499051.3	Siglec1	sialic acid binding Ig-like lectin 1, sialoadhesin, transcript variant X3	5,2,3	20,19,27	2.60639	0.000148177
NM_025331.2	Gng11	guanine nucleotide binding protein (G protein), gamma 11	181,190,183	1110,915,895	2.59422	4.2e-62
NM_009932.4	Col4a2	collagen, type IV, alpha 2	46,27,38	189,234,171	2.58621	4.83e-24
NM_025557.1	Pcp4l1	Purkinje cell protein 4-like 1	6,7,2	31,28,33	2.58269	1.09e-05
NM_172893.3	Parp12	poly (ADP-ribose) polymerase family, member 12	1803,1636,1824	9410,8628,8875	2.55854	5.69e-130
NM_001145164.1	Tgtp2	T cell specific GTPase 2	598,763,1141	4884,3990,3853	2.54976	4.62e-47
NM_008326.1	Irgm1	immunity-related GTPase family M member 1	32,35,49	172,216,216	2.5493	5.4e-26
NM_013560.2	Hspb1	heat shock protein 1	49,42,43	258,227,207	2.54439	4.2e-28
NM_011163.4	Eif2ak2	eukaryotic translation initiation factor 2-alpha kinase 2	360,359,400	1904,1863,1867	2.53345	9.31e-105
NM_011579.3	Tgtp1	T cell specific GTPase 1	450,585,790	3573,2884,2703	2.52958	3.19e-49
XM_017313661.1	LOC108167347	component of Sp100-rs-like	142,105,213	747,714,832	2.51345	3.81e-42
NR_073523.1	Slfn10-ps	schlafen 10, pseudogene, transcript variant 1	1,0,1	3,9,11	2.50783	0.0262342
XR_001780396.1	LOC102639982	uncharacterized LOC102639982, transcript variant X8	38,34,49	177,211,216	2.49002	4.35e-26
NM_010260.1	Gbp2	guanylate binding protein 2	1797,1509,2430	10482,8656,8692	2.48727	3.56e-63
NM_027147.1	Enho	energy homeostasis associated	4,3,1	17,20,15	2.48095	0.000994524
NM_025968.3	Ptgr1	prostaglandin reductase 1	8,11,9	60,50,39	2.48075	5.84e-08
NM_008392.1	Acod1	aconitate decarboxylase 1	1334,858,1167	5897,5886,4527	2.4782	2.51e-57
NM_011034.4	Prdx1	peroxiredoxin 1	45961,46040,41170	228054,209713,207121	2.4746	7.52e-103
NM_008706.5	Nqo1	NAD(P)H dehydrogenase, quinone 1	171,136,146	720,739,713	2.45441	2.47e-60
XM_006527333.2	Lipn	lipase, family member N, transcript variant X1	57,96,66	383,325,355	2.45282	3.8e-30
NM_008867.2	Pla2r1	phospholipase A2 receptor 1	0,0,1	6,4,7	2.44858	0.0297983
XM_017318270.1	Ms4a4c	membrane-spanning 4-domains, subfamily A, member 4C, transcript variant X3	23,22,26	86,136,125	2.42606	2.55e-15
NM_010959.2	Oit3	oncoprotein induced transcript 3	230,182,205	956,1027,907	2.42294	1.23e-65
XR_878684.2	Oas2	2'-5' oligoadenylate synthetase 2, transcript variant X4	175,117,187	681,735,828	2.42083	4.35e-50
NR_040456.1	Gm18853	predicted gene, 18853	106,163,193	794,669,699	2.4181	1.32e-38
XM_017320884.1	Oas2	2'-5' oligoadenylate synthetase 2, transcript variant X3	7,4,4	21,32,30	2.41482	4.79e-05
NM_013913.4	Angptl3	angiopoietin-like 3	14,16,18	100,63,72	2.41227	1.04e-10
NM_027399.3	Steap1	six transmembrane epithelial antigen of the prostate 1	2,0,3	10,15,11	2.41155	0.00670671
XM_006518957.3	Arhgap22	Rho GTPase activating protein 22, transcript variant X4	0,3,1	7,13,12	2.40665	0.0108666
NM_013632.4	Pnp	purine-nucleoside phosphorylase	2302,2512,2308	12323,10269,10213	2.40323	1.04e-79
NM_001303244.1	Il12b	interleukin 12b	15,7,6	46,54,43	2.40287	2.7e-07
XR_876973.2	Gm26637	predicted gene, 26637, transcript variant X3	2,2,3	16,9,20	2.39938	0.00261261
XM_006500974.3	Ctsk	cathepsin K, transcript variant X1	23,29,22	123,106,124	2.39838	8.09e-16
NM_011817.2	Gadd45g	growth arrest and DNA-damage-inducible 45 gamma	273,339,292	1506,1543,1123	2.39628	7.55e-50
NM_001033042.3	Lrrc14b	leucine rich repeat containing 14B	58,63,54	271,269,269	2.38549	2.89e-31
XM_006512811.3	Aig1	androgen-induced 1, transcript variant X1	180,162,157	827,718,729	2.38137	5.08e-53
NR_029464.1	5033406O09Rik	RIKEN cDNA 5033406O09 gene	12,15,18	74,77,65	2.37856	1.14e-10
NM_172506.2	Boc	biregional cell adhesion molecule-related/down-regulated by oncogenes (Cdon) binding protein	10,8,4	37,41,35	2.37508	3.32e-06
XM_006533584.3	Fads6	fatty acid desaturase domain family, member 6, transcript variant X2	29,20,24	117,112,112	2.37132	1.61e-15
XM_006497009.2	Slamf8	SLAM family member 8, transcript variant X1	24,11,21	87,95,82	2.36574	6.81e-12
NM_022430.2	Ms4a8a	membrane-spanning 4-domains, subfamily A, member 8A	1761,1557,1492	7527,7117,6823	2.3561	8.6e-88
NR_040453.1	Gm17757	predicted gene, 17757	118,175,219	840,692,752	2.34971	1.52e-36
NM_173740.3	Maoa	monoamine oxidase A	1367,1283,1285	5822,6004,5594	2.34618	7.54e-110
NR_131127.1	C230072F16Rik	RIKEN cDNA C230072F16 gene, transcript variant 1	4,2,0	18,12,10	2.33419	0.00580836
NM_028444.1	Prkcdbp	protein kinase C, delta binding protein	20,15,11	84,67,64	2.33025	9.11e-10
XM_017313713.1	Ankdd1a	ankyrin repeat and death domain containing 1A, transcript variant X4	96,64,100	371,339,427	2.31393	1.17e-32
NR_029457.1	G530011O06Rik	RIKEN cDNA G530011O06 gene, transcript variant 1	140,120,151	613,625,532	2.30037	1.9e-46
NR_137283.1	G530011O06Rik	RIKEN cDNA G530011O06 gene, transcript variant 1	165,138,150	718,610,620	2.29784	5.86e-46
NM_053113.2	Rnase2a	ribonuclease, RNase A family, 2A (liver, eosinophil-derived neurotoxin)	18,32,26	117,117,104	2.29278	5.63e-14
XM_006511595.3	Ankdd1a	ankyrin repeat and death domain containing 1A, transcript variant X2	1,3,1	20,10,5	2.28947	0.0105104
NM_026516.2	Tmem178	transmembrane protein 178	2,3,5	21,15,19	2.2883	0.00113758
XM_006516055.3	Flrt2	fibronectin leucine rich transmembrane protein 2, transcript variant X1	27,10,20	80,93,78	2.25658	2.62e-10
XR_379693.3	4930579C12Rik	RIKEN cDNA 4930579C12 gene	4,1,6	19,16,23	2.23537	0.00121477
NR_045318.1	4930552P12Rik	RIKEN cDNA 4930552P12 gene	6,9,5	42,19,35	2.23207	6.89e-05
NM_009393.2	Tnnc1	troponin C, cardiac/slow skeletal	5,4,8	35,24,23	2.23193	0.000127166
NM_172689.3	Ddx58	DEAD (Asp-Glu-Ala-Asp) box polypeptide 58	2066,2015,2365	8782,8580,8961	2.23108	7.35e-113
XM_006523863.3	Eif2ak2	eukaryotic translation initiation factor 2-alpha kinase 2, transcript variant X1	1,0,3	9,8,12	2.22328	0.0171269
NM_009676.2	Aox1	aldehyde oxidase 1	31,18,23	118,79,107	2.21228	1.58e-11
NM_144559.2	Fcgr4	Fc receptor, IgG, low affinity IV	1071,1194,1384	5428,4206,5039	2.21004	1.6e-60
XR_380624.3	Gm16104	predicted gene 16104	41,24,36	157,137,124	2.20625	2.9e-15
NM_009593.2	Abcg1	ATP-binding cassette, sub-family G (WHITE), member 1	3333,3076,3422	13425,12289,13611	2.20215	9.39e-104
NM_025378.2	Ifitm3	interferon induced transmembrane protein 3	11329,11892,10750	49526,45658,41054	2.19856	1.55e-73
XR_866370.2	Gm39839	predicted gene, 39839	11,13,25	69,58,81	2.19122	1.22e-08
NM_001163625.1	Sult6b1	sulfotransferase family, cytosolic, 6B, member 1	4,3,5	24,15,21	2.18516	0.000953502
XR_390931.2	Gm36317	predicted gene, 36317	15,32,36	110,90,145	2.18422	2.82e-11
NM_019750.3	Nat6	N-acetyltransferase 6	653,702,580	2615,2849,2243	2.18409	9.72e-56
NM_012006.2	Acot1	acyl-CoA thioesterase 1	65,88,95	335,361,295	2.17932	4.22e-28
NM_018738.4	Igtp	interferon gamma induced GTPase	1078,1173,1543	5347,4863,4685	2.17749	1.05e-60
NM_010821.1	Mpeg1	macrophage expressed gene 1	11,4,9	31,40,36	2.16673	1.98e-05
NM_027320.4	Ifi35	interferon-induced protein 35	1041,1201,1070	4680,4401,3871	2.16333	1.83e-62
NM_001162955.1	Gpr15	G protein-coupled receptor 15	6,7,2	22,25,25	2.15603	0.000420851
NM_009256.3	Serpinb9	serine (or cysteine) peptidase inhibitor, clade B, member 9	62,62,61	264,250,214	2.15203	1.03e-23
XR_389226.3	LOC102639982	uncharacterized LOC102639982, transcript variant X6	106,43,150	328,408,565	2.14923	1.65e-05
XR_001784010.1	Gm32553	predicted gene, 32553	4,4,3	9,19,29	2.14698	0.00215429
XM_006508649.3	Oraov1	oral cancer overexpressed 1, transcript variant X1	18,18,16	57,94,63	2.13708	7.6e-09
NM_007832.4	Dck	deoxycytidine kinase	1149,1019,1122	4316,3827,4435	2.13523	9.64e-79
NM_009451.3	Tubb4a	tubulin, beta 4A class IVA	20,18,24	79,76,94	2.13147	1.27e-10
NM_007482.3	Arg1	arginase, liver	7419,7028,6633	27153,26287,26212	2.11705	2.81e-87
NM_175105.3	Aqp11	aquaporin 11	13,7,8	35,40,44	2.11614	8.07e-06
XR_001784862.1	Gm30464	predicted gene, 30464, transcript variant X4	0,1,2	8,5,11	2.11155	0.0291756
XR_874348.1	Gm6904	predicted gene 6904, transcript variant X1	15,25,26	95,84,82	2.11025	2.3e-10
NM_172507.5	Sh3bgrl2	SH3 domain binding glutamic acid-rich protein like 2	320,271,327	1050,1137,1245	2.0982	6.28e-61
NM_172668.3	Lrp4	low density lipoprotein receptor-related protein 4, transcript variant 1	76,83,75	303,284,297	2.09667	1.14e-27
NM_021272.3	Fabp7	fatty acid binding protein 7, brain	3230,4156,3173	13948,12389,13210	2.09461	4.06e-52
NM_203320.3	Cxcl3	chemokine (C-X-C motif) ligand 3	162,68,100	415,486,354	2.09419	1.44e-18
XM_006538982.2	Ttll10	tubulin tyrosine ligase-like family, member 10, transcript variant X2	23,19,22	83,84,83	2.0929	1.26e-10
XM_017316040.1	Dusp13	dual specificity phosphatase 13, transcript variant X4	4,0,2	6,21,10	2.08955	0.0139322
NM_013463.2	Gla	galactosidase, alpha	4018,4102,3925	15165,14718,14757	2.08922	4.52e-92
NM_001166402.1	Tnfaip3	tumor necrosis factor, alpha-induced protein 3, transcript variant 2	4,0,3	15,13,11	2.08771	0.00915521
XR_379064.2	Gm33103	predicted gene, 33103, transcript variant X2	3,2,7	28,9,21	2.07713	0.00297078
NM_010156.3	Samd9l	sterile alpha motif domain containing 9-like	68,53,89	227,269,285	2.07106	9.28e-23
NM_007532.5	Bcat1	branched chain aminotransferase 1, cytosolic, transcript variant 2	3,1,1	13,11,7	2.07026	0.016443
XR_375740.1	Gm36569	predicted gene, 36569	44,26,52	121,163,177	2.06967	2.65e-14
XR_374007.1	Gm31902	predicted gene, 31902, transcript variant X2	2,1,1	7,8,12	2.05389	0.0223598
NM_139297.6	Ugp2	UDP-glucose pyrophosphorylase 2, transcript variant 1	96,74,82	278,316,326	2.04595	2.47e-27
NM_019466.4	Rcan1	regulator of calcineurin 1, transcript variant 2	13,10,12	39,56,44	2.04517	2.32e-06
NM_001024539.1	Shc2	SHC (Src homology 2 domain containing) transforming protein 2	134,127,126	430,518,456	2.04367	1.75e-36
XR_001779326.1	LOC108167690	uncharacterized LOC108167690	3,4,6	16,20,23	2.02937	0.00165678
XM_011245023.2	Phf11a	PHD finger protein 11A, transcript variant X1	1,3,4	14,14,13	2.02646	0.00743188
XM_011248764.2	Irgm1	immunity-related GTPase family M member 1, transcript variant X2	12,6,17	44,41,51	2.01316	6.96e-06
XM_006523247.3	Tulp4	tubby like protein 4, transcript variant X1	91,109,89	351,377,304	2.01293	7.9e-26
NM_145365.3	Creb3l3	cAMP responsive element binding protein 3-like 3	7,10,7	37,31,29	2.00775	8.43e-05
NM_001024230.2	Gm5431	predicted gene 5431	659,520,862	2473,2167,2486	2.00553	9.17e-42
XR_375721.2	Gm35039	predicted gene, 35039	3,0,0	7,7,10	2.00223	0.0340778
NM_146717.2	Olfr433	olfactory receptor 433	2,3,4	20,14,10	1.99804	0.00657604
NM_021893.3	Cd274	CD274 antigen	4078,3051,4394	13599,12928,13260	1.99149	1.91e-59
XR_391237.2	Gm32029	predicted gene, 32029	270,221,279	944,893,819	1.98349	2.79e-43
NM_175382.4	Fam72a	family with sequence similarity 72, member A	30,36,31	132,106,107	1.97424	6.87e-12
NM_024257.1	Hdhd3	haloacid dehalogenase-like hydrolase domain containing 3	71,62,42	217,221,178	1.97164	6.89e-16
NM_023270.5	Rnf128	ring finger protein 128, transcript variant 1	576,452,500	1657,1779,1734	1.95387	7.99e-57
XM_017321987.1	Il18bp	interleukin 18 binding protein, transcript variant X1	14,14,7	44,39,49	1.94945	1.29e-05
NR_105802.1	Mir6381	microRNA 6381	50,38,86	233,175,187	1.94264	2.86e-13
XM_001474231.4	Gm2666	predicted gene 2666	431,457,482	1473,1597,1516	1.94002	3.01e-63
NM_207208.3	Clca4a	chloride channel accessory 4A	2,1,0	5,10,8	1.93591	0.0364444
NM_009994.1	Cyp1b1	cytochrome P450, family 1, subfamily b, polypeptide 1	58,25,29	128,127,135	1.93243	1.5e-10
NM_009735.3	B2m	beta-2 microglobulin	48922,51538,48616	174497,160974,158699	1.93061	3.29e-70
XR_001782546.1	BC023105	cDNA sequence BC023105	22,20,57	143,100,100	1.92642	3.41e-08
NM_145228.2	Oas1h	2'-5' oligoadenylate synthetase 1H, transcript variant 1	7,4,6	25,17,27	1.92206	0.00118578
NM_030016.2	Trmt13	tRNA methyltransferase 13	17,15,17	48,67,60	1.92161	3.98e-07
NR_033566.1	AI507597	expressed sequence AI507597	6,17,12	37,51,42	1.91658	2.8e-05
NM_172541.2	Tmem120a	transmembrane protein 120A	1024,1231,983	3557,3782,3369	1.91426	1.15e-48
NM_001001178.1	Ccdc148	coiled-coil domain containing 148	2,7,2	21,14,15	1.91144	0.00612448
NR_030720.1	Gm8989	predicted gene 8989	246,317,339	1015,965,984	1.91	3.58e-40
XM_011242214.1	Ddx60	DEAD (Asp-Glu-Ala-Asp) box polypeptide 60, transcript variant X4	13,5,15	38,39,44	1.90696	4.12e-05
NM_001243916.1	Trim34b	tripartite motif-containing 34B	276,226,362	922,933,968	1.90575	2.74e-37
XM_006519261.1	Tspan14	tetraspanin 14, transcript variant X1	1,1,1	11,6,5	1.89672	0.0384244
NM_053247.4	Lyve1	lymphatic vessel endothelial hyaluronan receptor 1	5,4,6	22,18,21	1.89444	0.00202595
NM_008873.3	Plau	plasminogen activator, urokinase	20,30,35	108,87,93	1.89393	1.44e-09
XM_006515471.1	Evl	Ena-vasodilator stimulated phosphoprotein, transcript variant X2	1,0,1	11,4,4	1.8881	0.0498569
NM_023409.4	Npc2	Niemann-Pick type C2	33860,37837,33580	120833,110563,107531	1.88421	5.4e-58
NR_030719.1	Gm8979	predicted gene 8979	691,756,1061	2576,2567,2907	1.88081	4.23e-42
NR_030671.1	AW011738	expressed sequence AW011738	38,67,66	205,184,174	1.87971	3.51e-14
XM_017315556.1	BC147527	cDNA sequence BC147527, transcript variant X4	9,6,13	28,40,34	1.86595	0.000148933
NM_023141.2	Tor3a	torsin family 3, member A	5112,4823,5042	16445,15538,15368	1.8613	2.02e-74
NM_001007268.1	Dusp13	dual specificity phosphatase 13, transcript variant 1	1,5,4	17,17,11	1.86128	0.00899399
NM_001033149.3	Ttc9	tetratricopeptide repeat domain 9	28,16,28	73,97,71	1.85829	3.56e-08
XR_376167.2	Gm35066	predicted gene, 35066	0,0,3	9,10,4	1.85451	0.0422091
NM_001013741.1	Ddn	dendrin	27,23,31	82,91,93	1.84578	1.59e-09
NM_007929.2	Emp2	epithelial membrane protein 2	67,41,51	158,192,161	1.84163	4.59e-14
NM_181545.4	Slfn8	schlafen 8, transcript variant 1	16,21,38	71,84,93	1.83936	7.91e-08
NM_008828.3	Pgk1	phosphoglycerate kinase 1	6161,5988,5693	18315,19279,18012	1.83777	2.06e-71
NR_102366.1	AW112010	expressed sequence AW112010	1023,942,1148	4035,2768,2851	1.83258	4.31e-31
NM_028270.4	Aldh1b1	aldehyde dehydrogenase 1 family, member B1	229,217,269	864,673,678	1.82632	3.21e-29
XR_380840.2	Gm33481	predicted gene, 33481	8,8,9	40,24,26	1.82347	0.000454733
NM_197944.1	Hsh2d	hematopoietic SH2 domain containing	137,185,167	469,547,510	1.82331	8.22e-29
XR_380009.2	Gm34425	predicted gene, 34425	187,216,193	664,591,596	1.8228	1.84e-31
NM_010398.3	H2-T23	histocompatibility 2, T region locus 23	13070,15665,14882	48864,43476,41473	1.82024	2.74e-49
NM_023044.2	Slc15a3	solute carrier family 15, member 3	6665,5805,6432	19831,20398,17399	1.80887	3.38e-60
NM_023197.3	Knop1	lysine rich nucleolar protein 1, transcript variant 1	131,115,165	422,422,415	1.80443	8.39e-27
NM_026740.2	Slc46a1	solute carrier family 46, member 1	124,139,125	405,427,363	1.80439	1.54e-25
NM_175649.5	Tnfrsf26	tumor necrosis factor receptor superfamily, member 26	1151,1126,1054	3398,3325,3390	1.79908	1.9e-58
NM_026785.2	Ube2c	ubiquitin-conjugating enzyme E2C	52,53,45	157,147,164	1.79798	7.53e-14
NM_007793.3	Cstb	cystatin B	9499,9086,7742	27594,27356,24782	1.79089	4.8e-47
NM_025427.2	Rgcc	regulator of cell cycle	31,32,21	91,98,79	1.79083	1.54e-08
NM_009775.4	Tspo	translocator protein	3281,3694,2917	11182,9845,8945	1.78903	7.94e-37
NM_024495.5	Car13	carbonic anhydrase 13	673,495,674	1857,1922,1765	1.78816	5.65e-43
XR_881895.2	Gm38965	predicted gene, 38965	2,3,3	9,17,11	1.78631	0.0164626
NM_013484.2	C2	complement component 2 (within H-2S)	426,371,382	1185,1244,1122	1.78438	5.97e-44
XM_003084455.5	Gm15433	predicted pseudogene 15433	645,777,824	2169,2189,2385	1.78168	1.59e-49
XR_384517.1	Cd86	CD86 antigen, transcript variant X2	20,22,25	75,69,69	1.7816	1.26e-07
XR_378030.2	Gm33144	predicted gene, 33144	6,9,7	34,23,22	1.78065	0.00112032
XR_880427.1	LOC105246914	uncharacterized LOC105246914	36,21,25	68,89,102	1.76961	5.53e-08
NM_144848.2	Eppk1	epiplakin 1	2,3,10	21,18,19	1.76624	0.00583209
NR_003507.1	Oas1b	2'-5' oligoadenylate synthetase 1B, transcript variant 1, non-coding	307,332,326	1040,924,891	1.75845	1.03e-35
XM_011249971.2	4933430I17Rik	RIKEN cDNA 4933430I17 gene, transcript variant X3	28,30,31	86,77,113	1.75672	1.14e-08
NM_011044.2	Pck1	phosphoenolpyruvate carboxykinase 1, cytosolic	3,3,4	14,11,17	1.75349	0.0120907
NM_020622.2	Fam3b	family with sequence similarity 3, member B	2,4,4	16,13,13	1.75335	0.0121696
NM_007498.3	Atf3	activating transcription factor 3	4343,4711,4303	12920,14079,12281	1.75085	1.31e-56
NM_026515.2	2810417H13Rik	RIKEN cDNA 2810417H13 gene	120,147,134	372,445,375	1.75062	3.79e-24
NM_011519.2	Sdc1	syndecan 1	114,97,103	286,329,318	1.7491	1.53e-22
NM_016917.2	Slc40a1	solute carrier family 40 (iron-regulated transporter), member 1	8,4,10	26,25,26	1.74518	0.0013606
NM_001008233.3	Plekhn1	pleckstrin homology domain containing, family N member 1	450,437,434	1372,1314,1181	1.7441	1.81e-40
NM_010742.1	Ly6d	lymphocyte antigen 6 complex, locus D	158,232,193	541,621,557	1.73864	4.65e-25
NM_026353.4	Slc48a1	solute carrier family 48 (heme transporter), member 1	10670,9331,8723	27856,29187,26601	1.7376	1.9e-50
XM_006533235.3	Slfn9	schlafen 9, transcript variant X1	117,140,110	430,318,333	1.73286	1.12e-17
XM_006523250.2	Tulp4	tubby like protein 4, transcript variant X4	0,0,3	7,6,9	1.73257	0.0479199
NM_025288.2	Stfa3	stefin A3	6,5,7	19,28,18	1.72882	0.00304578
XR_388866.3	Gm10277	predicted gene 10277	7,5,6	17,28,20	1.72264	0.00315982
NM_025658.4	Ms4a4d	membrane-spanning 4-domains, subfamily A, member 4D	4,2,5	18,8,19	1.72235	0.0130315
NM_009425.2	Tnfsf10	tumor necrosis factor (ligand) superfamily, member 10	219,167,257	678,576,597	1.71901	6.74e-25
NM_001122596.1	A630033H20Rik	RIKEN cDNA A630033H20 gene, transcript variant 1	7,8,11	29,21,38	1.71898	0.000901032
NM_011369.2	Shcbp1	Shc SH2-domain binding protein 1	25,32,31	76,93,96	1.71237	1.87e-08
XM_006531177.1	Galns	galactosamine (N-acetyl)-6-sulfate sulfatase, transcript variant X2	6,5,9	20,28,22	1.71207	0.00233269
NM_019440.3	Irgm2	immunity-related GTPase family M member 2	1071,1040,1548	3676,3365,3374	1.71167	3.93e-35
NM_011990.2	Slc7a11	solute carrier family 7 (cationic amino acid transporter, y+ system), member 11	22,12,34	49,78,83	1.71089	6.13e-06
NM_146057.3	Dap	death-associated protein	2859,2897,2615	8240,8324,7364	1.70972	1.41e-48
NM_001313714.1	Sp100	nuclear antigen Sp100, transcript variant 4	291,385,335	1012,976,911	1.70756	1.22e-30
NM_001310727.1	Kmt5a	lysine methyltransferase 5A, transcript variant 4	8,3,6	15,26,21	1.70686	0.00461065
NM_001039562.1	Ankrd37	ankyrin repeat domain 37	12,10,10	32,39,33	1.7066	0.000241167
NM_019410.3	Pfn2	profilin 2	126,127,127	338,407,347	1.70286	1.93e-23
NM_016696.4	Gpc1	glypican 1	63,26,47	134,138,129	1.70113	2.46e-09
NM_010798.2	Mif	macrophage migration inhibitory factor	1588,1792,1404	4799,4989,3883	1.70084	5.61e-32
NM_007408.3	Plin2	perilipin 2	6,4,5	18,21,16	1.69325	0.00603318
NM_023418.2	Pgam1	phosphoglycerate mutase 1	9514,9048,8431	24677,27036,24546	1.69303	2.16e-56
XR_877160.1	Gm26682	predicted gene, 26682	3,9,4	17,21,21	1.68846	0.00595834
NM_021887.2	Il21r	interleukin 21 receptor	4,13,2	27,25,18	1.68799	0.00565027
NM_138602.4	Praf2	PRA1 domain family 2	412,425,320	1099,1152,1030	1.68604	5.27e-29
NM_009805.4	Cflar	CASP8 and FADD-like apoptosis regulator, transcript variant 2	100,75,91	262,233,259	1.67877	4.2e-17
NM_010480.5	Hsp90aa1	heat shock protein 90, alpha (cytosolic), class A member 1	5558,5683,5665	15123,16043,15907	1.67755	3.47e-71
NM_053273.2	Ttyh2	tweety family member 2	977,814,1005	2562,2699,2526	1.67744	5.88e-51
NM_011408.1	Slfn2	schlafen 2	6920,7415,7158	20858,19872,18780	1.66807	2.82e-53
NR_002890.1	Gm12070	predicted gene 12070	10113,10325,9431	27207,29470,26169	1.66705	1.18e-53
NM_009156.2	Sepw1	selenoprotein W, muscle 1	3385,4473,3475	11241,10680,9645	1.66507	4.13e-32
NM_178020.3	Hyal3	hyaluronoglucosaminidase 3	24,14,25	64,69,54	1.66423	4.77e-06
NM_008744.2	Ntn1	netrin 1	19,18,24	61,68,52	1.66247	4.24e-06
NM_001281472.1	Psme2b	protease (prosome, macropain) activator subunit 2B	1325,1292,1542	4057,3703,3681	1.66226	2e-48
NM_028133.2	Egln3	egl-9 family hypoxia-inducible factor 3	78,96,99	221,286,257	1.65428	6.5e-17
NM_009890.1	Ch25h	cholesterol 25-hydroxylase	4,3,4	15,10,18	1.65277	0.0149197
XM_011238875.2	Slamf7	SLAM family member 7, transcript variant X4	19,22,19	52,58,68	1.65209	4.97e-06
NM_011520.3	Sdc3	syndecan 3	236,85,170	417,497,466	1.65095	7.07e-12
NM_027209.3	Ms4a6b	membrane-spanning 4-domains, subfamily A, member 6B	1389,1655,1615	4512,3972,4281	1.65057	5.26e-42
NM_138953.2	Ell2	elongation factor RNA polymerase II 2	974,844,1010	2509,2679,2535	1.65019	5.08e-53
NM_001134480.1	Plcxd2	phosphatidylinositol-specific phospholipase C, X domain containing 2	138,124,190	416,406,423	1.64974	1.65e-21
XM_006496671.3	Ifi203	interferon activated gene 203, transcript variant X6	70,30,96	138,186,236	1.64932	3.77e-08
NM_009104.2	Rrm2	ribonucleotide reductase M2	182,140,166	385,531,427	1.63912	1.93e-21
NM_001013371.2	Dtx3l	deltex 3-like, E3 ubiquitin ligase	1860,1686,2218	5220,5027,5349	1.6388	6.83e-50
NM_177900.4	Hapln4	hyaluronan and proteoglycan link protein 4	25,24,23	58,86,65	1.63415	1.61e-06
NM_007381.4	Acadl	acyl-Coenzyme A dehydrogenase, long-chain	3411,3556,3341	9362,9317,9205	1.63082	2.05e-55
NM_207176.3	Tes	testis derived transcript	727,777,726	1866,2169,2000	1.62834	2.15e-45
XR_001779041.1	Gm38510	predicted gene, 38510, transcript variant X4	41,75,68	186,182,144	1.62609	3.08e-10
NM_009415.2	Tpi1	triosephosphate isomerase 1	5410,5563,4957	14096,15391,13413	1.62223	1.14e-46
NM_001289531.1	Cndp2	CNDP dipeptidase 2 (metallopeptidase M20 family), transcript variant 1	0,1,5	8,11,11	1.62143	0.0378373
XM_001476707.5	Gapdh-ps15	glyceraldehyde-3-phosphate dehydrogenase, pseudogene 15	2828,3049,2631	7736,8062,7093	1.61883	4.06e-42
NM_172301.3	Ccnb1	cyclin B1	57,58,53	141,181,142	1.61763	1.45e-11
XM_017321412.1	Mdfic	MyoD family inhibitor domain containing, transcript variant X1	3,6,7	16,17,23	1.61621	0.00802274
NM_029084.3	Slamf8	SLAM family member 8	175,131,141	384,447,379	1.6159	1.35e-20
NM_010615.1	Kif11	kinesin family member 11	132,109,103	261,373,305	1.61532	1.25e-16
NM_029094.3	Pik3cb	phosphatidylinositol 3-kinase, catalytic, beta polypeptide	7,5,14	22,28,33	1.61334	0.0022166
XR_375878.1	Gm31120	predicted gene, 31120	0,2,3	5,11,11	1.61324	0.042015
NM_007591.3	Calr	calreticulin	35202,36399,33756	95724,94877,91337	1.61042	8.22e-54
NR_045884.1	Dnmt3aos	DNA methyltransferase 3A, opposite strand	133,106,122	312,357,304	1.6095	2.35e-19
NR_035409.1	Mir692-3	microRNA 692-3	978,1026,844	2578,2397,2637	1.60776	1.34e-35
XR_385545.2	Gm19412	predicted gene, 19412	1001,899,1011	2583,2703,2441	1.60724	2.16e-48
NM_028039.2	Esco2	establishment of sister chromatid cohesion N-acetyltransferase 2	18,35,28	65,82,83	1.60269	1.81e-06
NM_008102.3	Gch1	GTP cyclohydrolase 1	1430,1435,1270	3969,3716,3297	1.60181	6.18e-35
NM_177356.3	Lamp3	lysosomal-associated membrane protein 3	15,9,15	39,35,42	1.60173	0.000268585
NM_009984.4	Ctsl	cathepsin L	631,638,637	1765,1715,1567	1.60079	1.84e-39
XM_006496789.1	Fam78b	family with sequence similarity 78, member B, transcript variant X1	54,46,58	145,141,143	1.59941	2.68e-11
NM_010724.2	Psmb8	proteasome (prosome, macropain) subunit, beta type 8 (large multifunctional peptidase 7)	4096,4946,4493	13115,11848,10829	1.59732	2.07e-35
NM_007494.3	Ass1	argininosuccinate synthetase 1	1263,1229,1120	3213,3235,3087	1.59397	4.85e-43
NM_026438.4	Ppa1	pyrophosphatase (inorganic) 1	377,429,386	1086,1143,927	1.59306	7.19e-29
NM_009977.3	Cst7	cystatin F (leukocystatin)	156,144,119	397,367,354	1.59219	1.93e-18
NM_010548.2	Il10	interleukin 10	33,33,27	77,90,91	1.58978	1.52e-07
XM_006539670.2	Ptgir	prostaglandin I receptor (IP), transcript variant X1	58,46,56	146,122,161	1.57653	2.22e-10
NM_031167.5	Il1rn	interleukin 1 receptor antagonist, transcript variant 1	24,13,17	47,58,48	1.56473	6.43e-05
NM_008721.4	Npdc1	neural proliferation, differentiation and control 1	8,9,11	28,32,25	1.56451	0.00171192
XR_388612.2	Gm12188	predicted gene 12188	14,8,24	42,43,47	1.56184	0.000289203
NM_007523.2	Bak1	BCL2-antagonist/killer 1	829,950,788	2288,2290,2066	1.56172	1.42e-32
NM_023731.3	Ccdc86	coiled-coil domain containing 86	731,673,702	1872,1825,1726	1.56137	2.16e-40
NM_007808.4	Cycs	cytochrome c, somatic	1728,1823,1626	4727,4355,4250	1.55877	2.67e-38
XM_006514219.3	Mfsd12	major facilitator superfamily domain containing 12, transcript variant X1	3008,3616,3102	8889,8360,7816	1.55709	4.11e-35
XM_006503621.3	Rell1	RELT-like 1, transcript variant X1	23,17,19	55,57,52	1.55474	2.56e-05
NR_002687.1	Gm5424	predicted gene 5424	383,385,363	907,1022,984	1.55455	1.36e-34
XM_006517193.3	Hk3	hexokinase 3, transcript variant X1	11,11,27	40,43,57	1.55431	0.000289382
NR_046286.1	H2-T10	histocompatibility 2, T region locus 10, transcript variant 1, non-coding	1222,1360,1208	3467,3155,3063	1.54656	3.47e-35
NM_025494.3	Atp6v1c1	ATPase, H+ transporting, lysosomal V1 subunit C1	4339,4710,4415	11344,11723,11203	1.54383	4.57e-50
XR_001784699.1	Oas1a	2'-5' oligoadenylate synthetase 1A, transcript variant X2	7,4,6	17,18,21	1.54113	0.00933033
NR_045895.1	Gm13546	predicted gene 13546, transcript variant 1	3,2,2	8,16,7	1.53982	0.0368157
NM_175512.2	Dhrs9	dehydrogenase/reductase (SDR family) member 9	257,161,273	512,604,654	1.53963	1.47e-18
NM_026473.2	Tubb6	tubulin, beta 6 class V	2945,3142,2933	7564,8257,7015	1.53511	2.49e-42
NM_022415.3	Ptges	prostaglandin E synthase	1942,1022,1240	3931,4110,3193	1.5337	1.88e-06
NM_007675.4	Ceacam10	carcinoembryonic antigen-related cell adhesion molecule 10	3,3,7	11,15,20	1.5275	0.0188323
NM_011074.3	Cdk14	cyclin-dependent kinase 14, transcript variant 1	18,11,22	31,58,54	1.52386	0.000258426
NM_001033189.3	C77080	expressed sequence C77080, transcript variant 1	13,7,7	26,19,37	1.51858	0.00389536
NM_028864.2	Zc3hav1	zinc finger CCCH type, antiviral 1, transcript variant 2	259,345,286	802,757,687	1.5172	1.97e-21
NM_026958.3	Slirp	SRA stem-loop interacting RNA binding protein	360,403,386	1086,963,825	1.51247	3.52e-23
XM_011240725.2	Zfyve28	zinc finger, FYVE domain containing 28, transcript variant X7	48,34,37	115,97,97	1.51113	1.2e-07
NM_027420.4	Arpin	actin-related protein 2/3 complex inhibitor	225,216,237	551,581,558	1.50747	1.14e-26
NR_109835.1	Mir692-2	microRNA 692-2	805,841,711	1840,2070,1964	1.50671	5.75e-34
NM_178825.4	Epsti1	epithelial stromal interaction 1 (breast), transcript variant b	4,4,5	12,15,18	1.50297	0.0185622
XR_375154.2	LOC102636309	uncharacterized LOC102636309, transcript variant X4	24,8,33	56,60,60	1.50259	0.000180475
NM_026965.2	Comtd1	catechol-O-methyltransferase domain containing 1	290,334,236	802,712,637	1.49874	1.44e-17
NM_011701.4	Vim	vimentin	25745,28661,26282	67009,70429,61410	1.49817	6.02e-41
NM_013562.2	Ifrd1	interferon-related developmental regulator 1	1126,1099,983	2454,2921,2575	1.49811	2.04e-35
NM_008655.1	Gadd45b	growth arrest and DNA-damage-inducible 45 beta	641,758,688	1870,1768,1521	1.49652	4.13e-27
XM_006507471.2	Trim30a	tripartite motif-containing 30A, transcript variant X1	43,32,41	93,91,114	1.49352	1.34e-07
NM_174850.3	Micall2	MICAL-like 2	9,5,13	24,35,21	1.4927	0.00444424
XR_880164.1	Gm38957	predicted gene, 38957, transcript variant X1	11,13,6	26,28,34	1.49245	0.00270007
NM_007659.3	Cdk1	cyclin-dependent kinase 1	99,108,93	248,262,240	1.49206	1.12e-14
NM_172733.1	Dera	deoxyribose-phosphate aldolase (putative)	557,540,502	1335,1368,1222	1.48671	5.59e-31
NM_001042534.3	Capg	capping protein (actin filament), gelsolin-like, transcript variant 2	28,25,23	64,71,63	1.47913	1e-05
NR_003568.1	Gpr137b-ps	G protein-coupled receptor 137B, pseudogene	4093,3980,4427	9619,10593,9977	1.47229	2.23e-56
NM_029688.5	Srxn1	sulfiredoxin 1 homolog (S. cerevisiae)	4804,4554,4521	10854,12217,10448	1.46755	3.72e-43
XM_001473764.3	A830005F24Rik	RIKEN cDNA A830005F24 gene	3,2,4	7,16,12	1.46746	0.0349449
NM_008533.2	Cd180	CD180 antigen	289,300,332	732,723,770	1.46504	1.75e-28
NM_008129.4	Gclm	glutamate-cysteine ligase, modifier subunit	3745,2822,2929	7484,8096,7378	1.46495	4.1e-31
NM_016740.3	S100a11	S100 calcium binding protein A11	3043,3288,2805	7677,7544,6841	1.46253	6.05e-33
NM_001167996.1	1110032F04Rik	RIKEN cDNA 1110032F04 gene	6,2,6	17,11,19	1.46212	0.0211568
XR_374006.2	Gm31902	predicted gene, 31902, transcript variant X1	20,20,26	54,53,64	1.45851	4.5e-05
XR_868352.1	Gm32725	predicted gene, 32725, transcript variant X8	4,3,4	9,10,21	1.4546	0.0296591
NM_001045540.2	Gm12185	predicted gene 12185	168,140,218	451,372,444	1.45448	7.25e-16
NM_001168405.1	Ankrd55	ankyrin repeat domain 55, transcript variant 4	2,4,2	10,11,11	1.45357	0.0387923
NM_001014836.3	4930404N11Rik	RIKEN cDNA 4930404N11 gene	736,901,801	1971,2003,1878	1.45313	1.58e-30
NM_146208.2	Neil3	nei like 3 (E. coli)	3,1,4	11,13,8	1.4508	0.0404768
NM_008509.2	Lpl	lipoprotein lipase	21497,18413,20632	44106,48329,51612	1.45007	3.34e-49
NM_019737.2	B4galt6	UDP-Gal:betaGlcNAc beta 1,4-galactosyltransferase, polypeptide 6	3834,2893,3644	8056,8079,8553	1.44973	4.05e-37
NM_001122954.1	Pla2g5	phospholipase A2, group V, transcript variant 1	0,4,2	10,8,10	1.44542	0.0491928
XR_388923.3	LOC102635154	uncharacterized LOC102635154	4,8,16	22,31,28	1.44535	0.00614169
NM_026170.3	Ergic1	endoplasmic reticulum-golgi intermediate compartment (ERGIC) 1	16,9,10	33,44,21	1.44526	0.00299615
NM_016921.3	Tcirg1	T cell, immune regulator 1, ATPase, H+ transporting, lysosomal V0 protein A3, transcript variant 1	24,15,32	62,51,69	1.44485	7.52e-05
NM_001039558.2	Smco3	single-pass membrane protein with coiled-coil domains 3	39,19,42	109,85,59	1.44461	4.03e-05
XM_006530048.3	Fabp4	fatty acid binding protein 4, adipocyte, transcript variant X1	10,9,8	30,23,24	1.44311	0.00473684
NM_011528.4	Taldo1	transaldolase 1	12920,14309,11410	32717,31177,28543	1.43891	1.28e-28
XR_867676.2	Gm40158	predicted gene, 40158	68,60,106	205,183,177	1.43856	9.48e-10
XR_881403.1	Gm42312	predicted gene, 42312, transcript variant X2	0,2,7	11,15,10	1.43711	0.0417818
NM_001159418.1	Irf9	interferon regulatory factor 9, transcript variant 2	1,7,3	14,14,12	1.43418	0.0327353
NM_029835.1	Ticrr	TOPBP1-interacting checkpoint and replication regulator	38,34,44	82,103,101	1.43192	3.92e-07
XR_381796.3	Gm26698	predicted gene, 26698	6,5,7	22,16,17	1.42997	0.014235
NM_133795.1	Ttc1	tetratricopeptide repeat domain 1	1150,1315,1170	3032,2913,2624	1.42895	2.19e-29
XM_006508660.3	Tnfrsf23	tumor necrosis factor receptor superfamily, member 23, transcript variant X1	5,0,6	13,16,11	1.42754	0.0361408
NM_028657.3	Mfsd12	major facilitator superfamily domain containing 12	66,59,70	142,154,174	1.42694	3.07e-10
NM_027514.2	Pvr	poliovirus receptor	557,527,577	1237,1500,1172	1.42619	3.71e-28
NM_013754.1	Insl6	insulin-like 6	133,134,96	333,296,242	1.42481	3.58e-11
NM_011186.1	Psmb5	proteasome (prosome, macropain) subunit, beta type 5	1201,1280,1104	2951,2978,2511	1.42478	1.42e-27
NM_011234.4	Rad51	RAD51 recombinase	76,61,68	157,180,156	1.42471	2.28e-10
NM_022325.5	Ctsz	cathepsin Z	33751,35663,30953	81993,81832,71842	1.42433	1.52e-32
NM_134090.2	Kdelr3	KDEL (Lys-Asp-Glu-Leu) endoplasmic reticulum protein retention receptor 3	11,17,19	42,35,46	1.41914	0.000742752
NM_027283.1	Spaca9	sperm acrosome associated 9	86,106,81	223,238,192	1.41804	4.24e-11
NM_001166138.1	Armc8	armadillo repeat containing 8, transcript variant 2	35,64,42	130,111,105	1.41801	1.12e-06
XM_006541410.3	C330007P06Rik	RIKEN cDNA C330007P06 gene, transcript variant X1	6,10,2	21,15,21	1.4168	0.0180267
NM_020520.4	Slc25a20	solute carrier family 25 (mitochondrial carnitine/acylcarnitine translocase), member 20	661,750,687	1571,1698,1610	1.40867	4.34e-32
XR_001778865.1	Gm33280	predicted gene, 33280	26,22,35	64,73,67	1.40235	2.15e-05
XM_017314228.1	Fam57a	family with sequence similarity 57, member A, transcript variant X1	78,81,66	193,169,171	1.40218	4.57e-10
XM_006539539.3	Ercc1	excision repair cross-complementing rodent repair deficiency, complementation group 1, transcript variant X1	10,5,11	27,20,26	1.40106	0.00767603
NM_001033446.2	Arl14epl	ADP-ribosylation factor-like 14 effector protein-like	11,15,7	39,32,20	1.39779	0.00518999
NR_040374.1	A230028O05Rik	RIKEN cDNA A230028O05 gene	77,72,84	178,178,189	1.39199	3.65e-11
NM_183391.3	Tnfsf18	tumor necrosis factor (ligand) superfamily, member 18	34,26,33	76,87,63	1.39132	1.3e-05
XM_006510329.3	Layn	layilin, transcript variant X1	143,125,100	283,319,257	1.38717	4.6e-12
NM_029023.3	Scpep1	serine carboxypeptidase 1	8479,8653,8858	19608,19859,19480	1.37985	5.58e-48
NM_019928.1	Klk4	kallikrein related-peptidase 4 (prostase, enamel matrix, prostate)	12,14,12	25,36,39	1.37729	0.00244405
XR_869176.2	Gm38832	predicted gene, 38832	70,78,54	151,159,164	1.37663	6.1e-09
NM_025797.3	Cyb5a	cytochrome b5 type A (microsomal)	1018,1087,857	2401,2200,2147	1.37384	5.71e-23
NR_040518.1	Gm4262	predicted gene 4262	35,53,36	105,115,77	1.37263	6.4e-06
NM_178616.3	Psmd11	proteasome (prosome, macropain) 26S subunit, non-ATPase, 11	26,15,27	52,66,49	1.37099	0.00020648
NM_023738.4	Uba7	ubiquitin-like modifier activating enzyme 7	3124,3380,3449	7693,7316,7448	1.37045	1.55e-39
NR_045955.1	Scpep1os	serine carboxypeptidase 1, opposite strand	328,292,349	735,687,768	1.36902	5.68e-24
XM_006528739.3	Mid1	midline 1, transcript variant X10	8,4,6	17,24,13	1.36503	0.0201618
XR_380292.2	Gm35154	predicted gene, 35154, transcript variant X1	16,14,14	33,43,36	1.36298	0.00139085
NM_027482.3	5730508B09Rik	RIKEN cDNA 5730508B09 gene	418,473,432	1116,1012,851	1.35847	5.15e-19
XM_006512758.3	Pde7b	phosphodiesterase 7B, transcript variant X1	185,197,173	456,374,426	1.35755	2.37e-15
NM_010496.3	Id2	inhibitor of DNA binding 2	3950,3692,3667	8182,8956,8147	1.35304	1.45e-39
NM_021274.2	Cxcl10	chemokine (C-X-C motif) ligand 10	56,70,114	232,187,133	1.35177	1.18e-06
NM_145079.3	Ugt1a6a	UDP glucuronosyltransferase 1 family, polypeptide A6A	121,84,107	203,243,263	1.35017	2.53e-11
XM_006512213.1	Shisa5	shisa family member 5, transcript variant X2	27,25,49	61,80,99	1.34896	5.05e-05
NM_010479.2	Hspa1a	heat shock protein 1A	337,382,369	890,840,700	1.34721	6.12e-19
XM_006498572.3	Blvra	biliverdin reductase A, transcript variant X3	29,33,40	74,79,86	1.34591	8.77e-06
XM_006502212.3	Fam46c	family with sequence similarity 46, member C, transcript variant X1	792,812,921	1898,1857,1828	1.34331	1.47e-32
NM_025380.2	Eef1e1	eukaryotic translation elongation factor 1 epsilon 1	309,315,305	672,711,685	1.34302	1.35e-23
XR_377620.3	Gm36673	predicted gene, 36673, transcript variant X3	46,43,67	127,101,129	1.33921	6.12e-07
NM_013875.5	Pde7b	phosphodiesterase 7B	15,14,19	38,32,49	1.3354	0.00149575
NM_001104529.1	Gpr35	G protein-coupled receptor 35, transcript variant 2	6,4,12	16,21,25	1.32969	0.0175984
XR_384254.2	Gm31134	predicted gene, 31134	37,50,49	89,98,126	1.32838	1.93e-06
NM_001034909.3	Gm6034	predicted gene 6034	24,30,24	62,72,51	1.3282	0.000134241
NM_025485.3	Mrps22	mitochondrial ribosomal protein S22	268,267,275	605,622,555	1.32602	1.54e-20
NM_175563.5	Prr11	proline rich 11	31,36,30	64,82,80	1.32349	2.21e-05
NM_023258.4	Pycard	PYD and CARD domain containing	1909,2020,1791	4369,4242,3895	1.32062	7.58e-28
XM_001477899.6	Gm10705	predicted gene 10705	343,396,339	791,785,790	1.31905	4.58e-21
NR_003363.1	Gm6548	predicted gene 6548	323,323,298	714,663,689	1.31721	1.35e-20
NM_030253.3	Parp9	poly (ADP-ribose) polymerase family, member 9	12,13,29	46,40,45	1.3145	0.00178323
NM_013825.3	Ly75	lymphocyte antigen 75	424,184,366	607,752,792	1.30934	8.6e-10
NR_051981.1	H2-Q5	histocompatibility 2, Q region locus 5	142,160,155	300,378,323	1.3058	4.35e-14
NM_175406.3	Atp6v0d2	ATPase, H+ transporting, lysosomal V0 subunit D2	205,190,232	393,461,512	1.30575	6.09e-17
XR_383716.2	LOC102638761	uncharacterized LOC102638761	29,34,23	79,49,73	1.30555	0.00020046
NM_133807.1	Lrrc59	leucine rich repeat containing 59	3898,3497,3579	7826,8355,7522	1.30419	4.83e-35
NM_001013372.2	Nrp	neural regeneration protein	92,124,95	233,234,219	1.30276	3.09e-10
XR_001779570.1	Gm39712	predicted gene, 39712	13,9,6	23,18,34	1.30081	0.0128032
NM_033612.2	Cela1	chymotrypsin-like elastase family, member 1	29,28,17	77,47,51	1.30049	0.000642403
XM_011239896.2	LOC105244345	small nuclear ribonucleoprotein Sm D1-like	13,14,12	39,31,27	1.2999	0.00430594
XM_011238727.1	Gm38510	predicted gene, 38510, transcript variant X2	7,11,13	24,24,32	1.29964	0.008521
NM_009894.3	Cideb	cell death-inducing DNA fragmentation factor, alpha subunit-like effector B	6,7,3	15,14,19	1.29916	0.0298693
NM_177003.5	Tigar	Trp53 induced glycolysis repulatory phosphatase	2,8,13	18,30,17	1.29894	0.0227222
NM_028179.1	2200002D01Rik	RIKEN cDNA 2200002D01 gene	19,24,14	42,52,43	1.29842	0.00107379
XR_868135.1	Gm40245	predicted gene, 40245, transcript variant X3	8,3,7	15,21,16	1.29806	0.0261863
NR_027919.1	Bambi-ps1	BMP and activin membrane-bound inhibitor, pseudogene (Xenopus laevis)	197,232,184	468,461,404	1.29662	4.59e-14
NM_175093.2	Trib3	tribbles pseudokinase 3	43,53,78	141,125,120	1.29653	1.03e-06
NR_015459.1	4933431E20Rik	RIKEN cDNA 4933431E20 gene	17,19,22	46,31,62	1.29635	0.00142724
NM_010515.2	Igf2r	insulin-like growth factor 2 receptor	5213,3798,5312	9221,10319,11187	1.29623	5.95e-26
NM_001161849.2	Sgk1	serum/glucocorticoid regulated kinase 1, transcript variant 4	44,33,39	87,90,84	1.29451	7.88e-06
NM_001310723.1	Kmt5a	lysine methyltransferase 5A, transcript variant 2	57,24,27	67,103,81	1.29292	0.000201863
NM_011804.2	Creg1	cellular repressor of E1A-stimulated genes 1	12694,12923,11566	27371,26149,26259	1.2928	2.74e-31
NM_010234.2	Fos	FBJ osteosarcoma oncogene	1219,1010,1118	2456,2645,2073	1.29254	5.52e-23
XR_871563.1	Gm10145	predicted gene 10145	143,161,129	313,316,309	1.28695	8.93e-13
NM_007483.2	Rhob	ras homolog family member B	3800,4079,3644	8225,9119,7348	1.28646	3.75e-26
NR_103513.1	Gm15694	predicted gene 15694	11,10,8	28,28,19	1.28282	0.0111539
NM_010478.2	Hspa1b	heat shock protein 1B	317,327,350	754,787,581	1.27995	3.46e-16
NM_010259.2	Gbp2b	guanylate binding protein 2b	709,939,1099	2693,1738,1708	1.27975	6.38e-05
NM_007791.5	Csrp1	cysteine and glycine-rich protein 1	998,1113,1041	2341,2231,2108	1.27775	8.24e-26
NM_009579.3	Slc30a1	solute carrier family 30 (zinc transporter), member 1	1316,1238,1358	2683,2826,2746	1.27553	2.62e-36
NM_009448.4	Tuba1c	tubulin, alpha 1C	12384,12805,11802	25699,27719,24635	1.27116	2.8e-32
NM_011045.2	Pcna	proliferating cell nuclear antigen	3700,4236,3995	8600,8662,7877	1.26997	3.1e-29
NM_011660.3	Txn1	thioredoxin 1	10444,10492,9440	22989,21395,19647	1.26854	8.98e-26
NM_001033978.3	H2-Eb2	histocompatibility 2, class II antigen E beta2	19,23,16	30,58,50	1.26829	0.00177048
NM_011967.3	Psma5	proteasome (prosome, macropain) subunit, alpha type 5	2073,2392,2050	4895,4575,4244	1.26723	4.98e-23
NM_133955.4	Rhou	ras homolog family member U	111,90,109	232,216,214	1.26659	1.57e-10
NM_178595.3	Ptrh1	peptidyl-tRNA hydrolase 1 homolog	32,57,30	98,94,76	1.2647	9.21e-05
NM_028595.4	Ms4a6c	membrane-spanning 4-domains, subfamily A, member 6C, transcript variant 1	1089,1150,1023	2617,1944,2316	1.26467	3.15e-18
NM_025927.4	Mrpl45	mitochondrial ribosomal protein L45	44,38,32	104,87,63	1.26277	7.69e-05
NM_053161.2	Mrpl27	mitochondrial ribosomal protein L27	54,54,59	121,129,112	1.26265	3.77e-07
NM_175666.2	Hist2h2bb	histone cluster 2, H2bb	12,9,27	33,38,44	1.26095	0.00477787
NM_001291058.1	Cd68	CD68 antigen, transcript variant 1	14388,14615,14258	29598,31508,29858	1.26066	3.45e-39
NM_009914.4	Ccr3	chemokine (C-C motif) receptor 3	7,1,5	16,11,14	1.26062	0.0457141
XR_001779527.1	LOC108167742	uncharacterized LOC108167742	45,27,30	81,74,72	1.25847	8.51e-05
NM_133749.2	Emc7	ER membrane protein complex subunit 7	98,86,79	202,187,173	1.25614	6.94e-09
NR_040613.1	Acss2os	acyl-CoA synthetase short-chain family member 2, opposite strand	43,25,47	77,90,86	1.25504	3.83e-05
XR_001778251.1	Gm8995	predicted gene 8995	6095,5303,8590	12420,13492,15758	1.254	7.49e-19
XM_006513720.1	Agpat3	1-acylglycerol-3-phosphate O-acyltransferase 3, transcript variant X5	35,28,49	68,103,76	1.25046	6.89e-05
NR_040387.1	AI606473	expressed sequence AI606473	241,300,292	573,609,561	1.24991	4.9e-17
NM_011189.1	Psme1	proteasome (prosome, macropain) activator subunit 1 (PA28 alpha)	5380,6018,5422	12421,11437,11035	1.24607	6.99e-26
NM_026545.3	Psmd8	proteasome (prosome, macropain) 26S subunit, non-ATPase, 8	4924,4946,4327	10135,10344,9012	1.24596	1.09e-24
NM_028803.4	Gbe1	glucan (1,4-alpha-), branching enzyme 1	1442,1298,1320	2696,2846,2867	1.24509	2.19e-31
NM_010240.2	Ftl1	ferritin light polypeptide 1	417292,467606,384837	939480,910506,765850	1.24483	2.6e-20
NR_030687.1	Rn7sk	RNA, 7SK, nuclear	35,54,41	92,98,92	1.23556	1.79e-05
NM_011590.2	Timm17a	translocase of inner mitochondrial membrane 17a	723,679,633	1360,1502,1335	1.2334	6.3e-23
NM_030241.3	Kmt5a	lysine methyltransferase 5A, transcript variant 1	9,3,7	12,20,21	1.23292	0.0327487
NM_145713.4	Hist1h1d	histone cluster 1, H1d	48,48,47	96,120,90	1.22731	6.48e-06
NM_013885.2	Clic4	chloride intracellular channel 4 (mitochondrial)	6071,5165,6263	11498,12721,11505	1.22647	2.61e-33
NM_008872.3	Plat	plasminogen activator, tissue	18,15,3	21,41,31	1.22624	0.0174795
NR_037965.1	Gm6644	predicted gene 6644	729,971,792	1817,1708,1601	1.2251	4e-17
XR_879970.2	Tnfsf13os	tumor necrosis factor (ligand) superfamily, member 13, opposite strand, transcript variant X1	26,24,28	54,53,65	1.22465	0.000371806
NM_016900.4	Cav2	caveolin 2, transcript variant 1	658,796,770	1428,1533,1591	1.22346	1.31e-23
NM_001025388.1	Eno1b	enolase 1B, retrotransposed	8671,8693,7755	17051,18385,15931	1.22194	2.57e-26
NM_021273.4	Ckb	creatine kinase, brain	2666,2866,2490	5555,6214,4663	1.22079	1.15e-19
XM_006503101.1	Rims3	regulating synaptic membrane exocytosis 3, transcript variant X1	8,3,3	15,14,13	1.21941	0.0463352
XM_006533676.3	Polg2	polymerase (DNA directed), gamma 2, accessory subunit, transcript variant X2	52,41,39	110,78,94	1.21691	3.51e-05
NM_010879.3	Nck2	non-catalytic region of tyrosine kinase adaptor protein 2	578,653,577	1176,1235,1275	1.2156	3.21e-22
XR_001783521.1	LOC102636309	uncharacterized LOC102636309, transcript variant X2	22,18,11	49,40,29	1.20736	0.00549117
NM_153574.2	Fam13a	family with sequence similarity 13, member A	77,82,102	155,193,191	1.20671	1.67e-08
NM_020275.4	Tnfrsf10b	tumor necrosis factor receptor superfamily, member 10b	19,17,26	46,55,37	1.20498	0.00198228
NM_019419.2	Arl6ip1	ADP-ribosylation factor-like 6 interacting protein 1	5854,6077,5817	12159,11790,11770	1.2035	3.62e-31
NR_028540.1	Snord12	small nucleolar RNA, C/D box 12	31,42,28	65,90,64	1.2032	0.000238484
NM_026410.3	Cdca5	cell division cycle associated 5	68,84,64	136,185,130	1.2001	1.2e-06
NM_027356.2	Ufsp1	UFM1-specific peptidase 1	39,41,37	75,85,88	1.19964	3.76e-05
NM_007630.2	Ccnb2	cyclin B2	50,64,54	96,143,114	1.19911	5.89e-06
NM_010708.2	Lgals9	lectin, galactose binding, soluble 9, transcript variant 1	19,7,10	19,32,37	1.1982	0.0151771
NM_025894.2	Psmd12	proteasome (prosome, macropain) 26S subunit, non-ATPase, 12	1663,1763,1702	3446,3465,3323	1.19241	2.85e-28
NM_023721.2	Atp6v1d	ATPase, H+ transporting, lysosomal V1 subunit D	2045,2347,2027	4414,4277,4160	1.19236	4.95e-23
NM_009807.2	Casp1	caspase 1	2721,3064,2844	6405,5380,5459	1.19233	8.08e-21
NM_016972.2	Slc7a8	solute carrier family 7 (cationic amino acid transporter, y+ system), member 8	708,305,743	1100,1376,1338	1.18909	0.00137715
NM_009546.2	Trim25	tripartite motif-containing 25	7,8,5	9,27,19	1.1887	0.0378817
NM_007392.3	Acta2	actin, alpha 2, smooth muscle, aorta	19,24,25	49,51,48	1.18681	0.0012155
NM_146116.2	Tubb4b	tubulin, beta 4B class IVB	4130,4585,4019	8301,8917,8158	1.18571	1.18e-25
NM_009229.4	Sntb2	syntrophin, basic 2	1094,546,1182	1751,1967,1934	1.18266	7.17e-10
XR_880087.1	Gm38933	predicted gene, 38933	41,46,33	90,85,77	1.18197	7.83e-05
NM_021279.4	Wnt1	wingless-type MMTV integration site family, member 1	64,44,36	103,115,84	1.18095	7.13e-05
NM_009658.3	Akr1b3	aldo-keto reductase family 1, member B3 (aldose reductase)	3505,4237,3547	7839,7373,7262	1.18013	6.21e-21
NM_008950.1	Psmc5	protease (prosome, macropain) 26S subunit, ATPase 5	2158,2388,1983	4476,4336,4145	1.17774	5.26e-21
NM_153507.2	Cpne2	copine II	930,862,758	1792,1729,1544	1.17729	1.26e-17
NM_025429.2	Serpinb1a	serine (or cysteine) peptidase inhibitor, clade B, member 1a	82,102,92	164,261,142	1.17593	2.73e-06
NM_008946.4	Psmb6	proteasome (prosome, macropain) subunit, beta type 6	2615,3017,2389	5468,5579,4834	1.17065	2.78e-18
NR_130962.1	B230307C23Rik	RIKEN cDNA B230307C23 gene	92,104,111	211,218,186	1.1696	8.56e-09
NM_008798.2	Pdcd1	programmed cell death 1	122,122,112	212,296,209	1.16915	1.32e-08
XM_006527472.3	Pik3ap1	phosphoinositide-3-kinase adaptor protein 1, transcript variant X1	4576,4251,4103	8774,8338,8282	1.16894	4.17e-26
NM_029017.2	Mrpl47	mitochondrial ribosomal protein L47	217,240,228	493,417,445	1.1667	6.13e-13
NM_178058.4	Aifm2	apoptosis-inducing factor, mitochondrion-associated 2, transcript variant 2	10,17,10	38,27,22	1.16669	0.0153812
NM_001164289.1	Phf11c	PHD finger protein 11C	16,16,18	41,29,41	1.16563	0.00549899
NM_007509.3	Atp6v1b2	ATPase, H+ transporting, lysosomal V1 subunit B2	12934,12914,12859	25029,25404,25153	1.16246	7.05e-34
NM_025460.2	Tmem126a	transmembrane protein 126A	461,545,510	1033,963,980	1.16243	5.12e-18
NM_201410.3	Ugt1a6b	UDP glucuronosyltransferase 1 family, polypeptide A6B	66,46,41	92,117,106	1.16189	3.22e-05
XM_006506444.1	Sumf1	sulfatase modifying factor 1, transcript variant X1	50,59,56	127,101,107	1.16028	1.1e-05
NM_080419.2	Igsf8	immunoglobulin superfamily, member 8	10086,11081,9841	21919,20481,18247	1.15995	1.23e-20
NR_026843.1	Bach2os	BTB and CNC homology 2, opposite strand	65,59,93	140,117,181	1.15923	5.72e-06
NR_045953.1	4930432J09Rik	RIKEN cDNA 4930432J09 gene	53,39,44	107,87,84	1.15749	5.98e-05
NM_001122675.1	Zcchc2	zinc finger, CCHC domain containing 2, transcript variant B	151,118,169	304,286,272	1.15597	4.51e-10
NR_040728.1	1700110K17Rik	RIKEN cDNA 1700110K17 gene	25,21,38	50,69,58	1.15591	0.000984393
NM_025443.2	Pno1	partner of NOB1 homolog	927,846,846	1649,1774,1681	1.15548	5.04e-24
NM_028132.3	Pgm2	phosphoglucomutase 2	949,1006,952	1876,2041,1750	1.15446	7.3e-22
NM_173758.3	Vwa8	von Willebrand factor A domain containing 8, transcript variant 2	6,17,5	27,28,16	1.15128	0.0323085
NR_033139.1	AI427809	expressed sequence AI427809, transcript variant 1	11,1,7	15,17,20	1.14989	0.049173
NM_178892.5	Tiparp	TCDD-inducible poly(ADP-ribose) polymerase	1684,1617,1796	3122,3397,3340	1.14978	9.93e-32
NM_008944.2	Psma2	proteasome (prosome, macropain) subunit, alpha type 2	2677,3071,2721	5753,5518,5171	1.14895	2.07e-21
NM_021526.2	Psmd14	proteasome (prosome, macropain) 26S subunit, non-ATPase, 14	2098,2472,2100	4555,4252,4159	1.14861	1e-19
XR_001779396.1	Gm28800	predicted gene 28800	26,8,27	36,53,45	1.14775	0.0067546
NM_029840.1	Tstd3	thiosulfate sulfurtransferase (rhodanese)-like domain containing 3	321,434,360	768,731,680	1.14685	4.97e-13
NM_181547.3	Nostrin	nitric oxide synthase trafficker	158,154,166	308,313,312	1.14451	6.66e-12
XM_006523344.1	Mrpl18	mitochondrial ribosomal protein L18, transcript variant X1	19,12,17	39,40,27	1.14449	0.00813519
XR_105606.4	A430057M04Rik	RIKEN cDNA A430057M04 gene, transcript variant X4	155,189,124	341,331,256	1.144	8.11e-08
NM_134103.2	Il1rap	interleukin 1 receptor accessory protein, transcript variant 2	11,7,5	22,16,20	1.1439	0.0350825
NM_028247.4	Slc16a10	solute carrier family 16 (monocarboxylic acid transporters), member 10, transcript variant 2	40,55,41	110,87,80	1.14188	0.000126796
XR_001780284.1	LOC108167917	uncharacterized LOC108167917	44,27,46	62,80,98	1.13917	0.000294895
XM_006540678.3	Anpep	alanyl (membrane) aminopeptidase, transcript variant X1	317,209,369	478,621,644	1.13907	2.71e-10
NM_028341.4	Ttc39c	tetratricopeptide repeat domain 39C	218,205,190	420,428,346	1.13897	3.58e-11
XM_011249910.2	Bach2	BTB and CNC homology, basic leucine zipper transcription factor 2, transcript variant X5	15,9,12	29,24,29	1.13374	0.0163467
NM_009940.3	Coq7	demethyl-Q 7, transcript variant 1	37,56,44	112,93,73	1.13315	0.000201799
NM_178729.4	Fbxl5	F-box and leucine-rich repeat protein 5, transcript variant 2	23,15,20	47,36,41	1.13232	0.00470419
NM_026282.5	Spc24	SPC24, NDC80 kinetochore complex component, homolog (S. cerevisiae)	5,7,10	20,16,19	1.13198	0.0380895
NM_001081365.1	Cystm1	cysteine-rich transmembrane module containing 1	120,103,106	234,231,178	1.13102	7.93e-08
NM_019746.4	Pdcd5	programmed cell death 5	103,113,89	211,214,174	1.13075	1.66e-07
NR_028590.1	Gm14005	predicted gene 14005, transcript variant 2	26,22,22	45,57,45	1.12871	0.00213044
NR_046069.1	Gm2848	predicted gene 2848	153,108,179	280,264,308	1.12862	7.17e-09
NM_008947.3	Psmc1	protease (prosome, macropain) 26S subunit, ATPase 1	3246,3460,3125	6449,6510,5845	1.12808	2.38e-22
NM_001163102.1	Eme2	essential meiotic structure-specific endonuclease subunit 2	249,258,301	539,554,458	1.12774	3.92e-13
XR_001778123.1	LOC108167426	uncharacterized LOC108167426, transcript variant X3	102,93,96	167,196,205	1.12594	3.35e-08
NM_178598.2	Tagln2	transgelin 2	11617,12179,10497	22294,22866,20350	1.12415	2.78e-21
NM_008489.2	Lbp	lipopolysaccharide binding protein	52,33,27	87,85,58	1.12252	0.00093788
NM_025272.2	Atp6v0e	ATPase, H+ transporting, lysosomal V0 subunit E	4941,5548,4597	9865,9988,8967	1.12219	2.12e-19
NM_019682.4	Dynll1	dynein light chain LC8-type 1	2846,3373,2769	6192,5826,5151	1.12052	1.81e-16
NM_021473.3	Akr1a1	aldo-keto reductase family 1, member A1 (aldehyde reductase)	29989,33604,28571	61588,57251,56388	1.11828	1.94e-20
XM_017321859.1	Gm36327	predicted gene, 36327	28,27,23	58,52,51	1.11828	0.00154123
XM_006495433.3	Atp6v1h	ATPase, H+ transporting, lysosomal V1 subunit H, transcript variant X1	15,12,21	31,33,40	1.11787	0.00911922
NR_132106.1	Mir155hg	Mir155 host gene (non-protein coding)	80,60,85	163,140,135	1.11746	2.73e-06
NM_153578.2	Nipa1	non imprinted in Prader-Willi/Angelman syndrome 1 homolog (human)	138,105,121	243,223,235	1.11617	9.66e-09
NM_001042653.1	Oip5	Opa interacting protein 5	18,19,23	43,43,40	1.1147	0.00414823
XM_006507857.1	Il27	interleukin 27, transcript variant X1	50,41,23	77,79,77	1.1145	0.00070431
NM_001305585.1	Apoa2	apolipoprotein A-II, transcript variant 4	27,28,22	57,47,55	1.11393	0.00183043
NM_011838.4	Lynx1	Ly6/neurotoxin 1	99,116,102	180,215,219	1.11342	3.49e-08
NM_177374.4	Trmt61a	tRNA methyltransferase 61A, transcript variant 1	5,5,11	14,19,20	1.11305	0.044872
XR_104651.5	Gm13199	predicted gene 13199, transcript variant X1	31,30,19	50,62,54	1.11237	0.00191986
NM_029655.3	Snx7	sorting nexin 7, transcript variant 1	25,19,27	61,44,42	1.11228	0.00324851
NM_027592.3	Ak6	adenylate kinase 6	340,350,303	702,591,598	1.11164	2e-12
NM_199035.2	Alg8	asparagine-linked glycosylation 8 (alpha-1,3-glucosyltransferase)	69,63,51	110,126,124	1.11107	1.1e-05
NM_175224.4	Metap1	methionyl aminopeptidase 1	1316,1287,1252	2372,2492,2411	1.10963	9.19e-25
NR_046048.1	Gm10677	predicted gene 10677	102,100,166	239,238,228	1.10866	1.63e-07
NM_016846.3	Rgl1	ral guanine nucleotide dissociation stimulator,-like 1	30,21,29	47,53,64	1.10859	0.00165678
XM_983271.5	Gm7160	predicted gene 7160	25,23,25	49,53,48	1.10756	0.00201086
NM_025624.2	Pomp	proteasome maturation protein	2984,3159,2678	5847,5572,5239	1.10672	7.77e-19
NM_011187.1	Psmb7	proteasome (prosome, macropain) subunit, beta type 7	653,813,640	1329,1461,1211	1.10636	5.65e-14
NM_177083.4	B430306N03Rik	RIKEN cDNA B430306N03 gene	122,98,153	225,206,284	1.10594	1.25e-07
NM_028932.4	Eaf1	ELL associated factor 1	2634,2365,2685	4327,5334,4802	1.10574	3.95e-26
NM_001110310.1	Snx12	sorting nexin 12, transcript variant 1	862,915,844	1644,1632,1650	1.1018	8.31e-21
NM_023247.1	Ndufaf3	NADH dehydrogenase (ubiquinone) 1 alpha subcomplex, assembly factor 3	406,412,377	790,753,708	1.10033	6.09e-15
NM_009917.5	Ccr5	chemokine (C-C motif) receptor 5	2248,2060,2283	4330,3851,4111	1.09782	3.48e-23
NM_178263.3	Ankrd27	ankyrin repeat domain 27 (VPS9 domain), transcript variant 2	28,16,14	35,36,53	1.09735	0.00859154
NM_029362.3	Chmp4b	charged multivesicular body protein 4B	6639,7497,6480	13840,12852,11814	1.09592	4.15e-18
NM_015787.4	Hist1h1e	histone cluster 1, H1e	9,16,9	16,30,33	1.09553	0.0269022
NM_024478.2	Grpel1	GrpE-like 1, mitochondrial	1518,1656,1380	2842,2954,2709	1.08923	3.9e-18
NM_010172.4	F7	coagulation factor VII	4287,4375,3815	8424,7593,7187	1.08606	1.41e-17
NM_016904.1	Cks1b	CDC28 protein kinase 1b	128,128,109	239,255,198	1.08528	1.03e-07
XM_011248663.2	Csnk1d	casein kinase 1, delta, transcript variant X1	60,63,53	121,142,80	1.08411	0.0001327
NM_001033393.2	Tmem104	transmembrane protein 104	3122,2645,3016	5294,5640,5323	1.08366	7.37e-26
XM_006532229.2	Gna13	guanine nucleotide binding protein, alpha 13, transcript variant X1	58,65,59	133,114,103	1.08327	2.8e-05
NM_008577.4	Slc3a2	solute carrier family 3 (activators of dibasic and neutral amino acid transport), member 2, transcript variant 2	121,89,117	199,223,195	1.08293	9.5e-08
NM_080837.2	Mydgf	myeloid derived growth factor	1409,1668,1321	2751,2866,2576	1.08169	7.25e-16
NM_001293683.1	Zwint	ZW10 interactor, transcript variant 2	827,974,807	1642,1668,1542	1.08145	4.61e-16
NM_028870.3	Cltb	clathrin, light polypeptide (Lcb)	98,122,106	219,222,176	1.08045	3.86e-07
NM_008990.3	Nectin2	nectin cell adhesion molecule 2, transcript variant 1	58,42,45	93,86,102	1.07904	0.000114409
NM_022889.3	Pes1	pescadillo ribosomal biogenesis factor 1	79,64,65	151,117,129	1.07874	1.43e-05
XM_006538681.3	Dhrs3	dehydrogenase/reductase (SDR family) member 3, transcript variant X4	10,9,12	28,24,18	1.07789	0.0299098
NM_001162932.1	Rmi2	RecQ mediated genome instability 2	42,37,32	64,87,68	1.07757	0.000569461
NM_178891.5	Prmt6	protein arginine N-methyltransferase 6, transcript variant 1	98,71,74	143,162,157	1.07702	2.58e-06
NM_025659.4	Abi3	ABI gene family, member 3, transcript variant 1	60,40,48	115,84,87	1.07468	0.00023434
NM_011875.4	Psmd13	proteasome (prosome, macropain) 26S subunit, non-ATPase, 13	2532,2748,2409	5016,4805,4363	1.07415	5.43e-18
NM_010137.3	Epas1	endothelial PAS domain protein 1	7221,6523,7932	12293,13399,14123	1.07343	1.43e-28
NM_145229.2	AY074887	cDNA sequence AY074887	78,80,68	164,143,122	1.07128	1.14e-05
NM_027195.2	Casz1	castor zinc finger 1, transcript variant 2	20,31,19	51,42,50	1.07096	0.00505583
NR_040558.1	4933439K11Rik	RIKEN cDNA 4933439K11 gene	23,21,31	43,46,62	1.07089	0.00350632
NM_013777.2	Akr1c12	aldo-keto reductase family 1, member C12	49,38,47	79,92,87	1.06804	0.000158022
NM_021718.2	Ms4a4b	membrane-spanning 4-domains, subfamily A, member 4B	112,119,148	250,217,233	1.05854	6.2e-08
NM_025551.3	Ndufa12	NADH dehydrogenase (ubiquinone) 1 alpha subcomplex, 12	550,708,540	1128,1234,953	1.05845	4.9e-11
NR_033541.1	Gm10389	predicted gene 10389	10,9,17	23,18,39	1.05811	0.031129
XM_017319383.1	Gm6306	predicted gene 6306	9,8,6	22,19,14	1.05808	0.0488532
NM_207161.3	Dnph1	2'-deoxynucleoside 5'-phosphate N-hydrolase 1	94,79,67	138,192,125	1.05792	2.6e-05
NM_029555.2	Gstk1	glutathione S-transferase kappa 1	190,224,224	407,410,354	1.05626	2.24e-10
NM_025430.3	Mrpl35	mitochondrial ribosomal protein L35	471,501,460	905,849,860	1.05577	3.06e-15
NM_207202.2	Ccdc120	coiled-coil domain containing 120	27,20,28	64,42,43	1.05192	0.00528201
NM_021788.2	Sap30	sin3 associated polypeptide	698,662,588	1226,1232,1088	1.05051	2.25e-14
NM_026027.3	Pfdn1	prefoldin 1	821,937,732	1560,1547,1436	1.05015	9.52e-14
NM_009804.2	Cat	catalase	10674,9996,9968	18122,19189,18011	1.04858	1.12e-25
NM_008881.2	Plxna1	plexin A1	9085,5714,8909	12884,15045,15020	1.04736	3.14e-13
XR_380738.3	Gm34921	predicted gene, 34921	78,93,85	204,134,140	1.04717	2.99e-05
NM_024173.2	Atp6v1g1	ATPase, H+ transporting, lysosomal V1 subunit G1	4841,5173,4581	9159,8779,8582	1.04702	5.79e-20
XM_006532231.3	Gngt2	guanine nucleotide binding protein (G protein), gamma transducing activity polypeptide 2, transcript variant X2	14,11,10	28,24,24	1.0445	0.0280561
NR_045794.1	Gm16907	predicted gene, 16907	94,70,97	156,188,139	1.0433	5.81e-06
XM_017315330.1	Ahnak2	AHNAK nucleoprotein 2	4725,4089,5545	7885,8451,9463	1.04278	3.17e-20
NM_027450.3	Glipr2	GLI pathogenesis-related 2	519,676,592	1177,1095,967	1.04231	7.27e-12
NM_026734.1	Tmem126b	transmembrane protein 126B	307,336,298	579,551,576	1.04162	1.32e-12
NM_011970.4	Psmb2	proteasome (prosome, macropain) subunit, beta type 2	62,75,68	133,129,119	1.03952	1.87e-05
XR_001779635.1	LOC108167327	uncharacterized LOC108167327	23,24,34	49,53,56	1.03897	0.00320434
NM_001012273.1	Birc5	baculoviral IAP repeat-containing 5, transcript variant 3	15,15,7	32,28,21	1.03887	0.0310773
NM_026768.3	Mrps18a	mitochondrial ribosomal protein S18A	960,1108,876	1879,1796,1645	1.0383	2.62e-13
XM_006512809.3	Vta1	vesicle (multivesicular body) trafficking 1, transcript variant X1	4,18,19	36,16,40	1.0383	0.0406676
NM_018871.3	Ywhag	tyrosine 3-monooxygenase/tryptophan 5-monooxygenase activation protein, gamma polypeptide	10948,10319,11143	19214,19668,19003	1.03508	2.9e-28
NM_172964.4	Arhgap28	Rho GTPase activating protein 28	15,28,19	55,34,37	1.0346	0.01276
XR_385292.2	H2-Q7	histocompatibility 2, Q region locus 7, transcript variant X1	18,13,19	35,35,32	1.03435	0.0143373
NM_026519.3	Emc4	ER membrane protein complex subunit 4	1077,1088,937	2004,1902,1664	1.03241	8.75e-14
XM_017321860.1	Gm40369	predicted gene, 40369	85,73,86	169,152,127	1.03211	1.09e-05
NM_001030274.1	Ndufs5	NADH dehydrogenase (ubiquinone) Fe-S protein 5	1045,1149,965	1950,2020,1709	1.03144	2.25e-14
NM_008495.2	Lgals1	lectin, galactose binding, soluble 1	4903,5846,4708	9631,9642,8531	1.03121	4.66e-15
NM_009836.1	Cct3	chaperonin containing Tcp1, subunit 3 (gamma)	3439,3759,3462	6161,6728,6158	1.02997	2.35e-21
NM_001085390.1	Dusp5	dual specificity phosphatase 5	131,130,166	235,306,233	1.02818	9.41e-08
NM_026163.2	Pkp2	plakophilin 2	19,15,19	34,52,23	1.02458	0.018619
XM_006512212.3	Shisa5	shisa family member 5, transcript variant X1	32,38,44	75,76,64	1.02375	0.000947109
XM_017321858.1	Gm40364	predicted gene, 40364	72,63,61	139,111,111	1.02288	6.34e-05
NM_009698.2	Aprt	adenine phosphoribosyl transferase	2404,2853,2168	4579,4605,4068	1.02081	4.08e-13
NM_008921.2	Prim1	DNA primase, p49 subunit	153,176,160	266,351,267	1.0208	4.21e-08
NM_026011.3	Arl8b	ADP-ribosylation factor-like 8B	5258,5055,5224	9015,9003,9463	1.02021	3.2e-26
NM_025836.3	Plin3	perilipin 3	3210,3389,3277	5740,6019,5739	1.01753	2.6e-23
NM_001177467.1	Gm7030	predicted gene 7030	3362,4000,3517	6408,7237,5682	1.01714	6.64e-15
NM_010722.5	Lmnb2	lamin B2	62,39,70	101,104,110	1.01664	0.00018661
NM_025289.3	Tbrg1	transforming growth factor beta regulated gene 1	1751,2062,1734	3405,3302,3139	1.01594	1.63e-15
NM_130449.2	Colec12	collectin sub-family member 12	566,387,657	845,897,1122	1.01437	1.37e-09
NM_001195298.1	Kifc1	kinesin family member C1	13,10,9	18,23,29	1.01409	0.0392
NM_018768.2	Stx8	syntaxin 8	411,474,398	800,802,679	1.01161	3.01e-11
XM_011248662.1	Csnk1d	casein kinase 1, delta, transcript variant X2	48,35,38	67,103,59	1.01126	0.00180107
NR_045719.1	AU022793	expressed sequence AU022793	336,351,278	545,585,591	1.011	5.76e-11
XM_006507290.1	Cln3	ceroid lipofuscinosis, neuronal 3, juvenile (Batten, Spielmeyer-Vogt disease), transcript variant X3	225,152,185	301,347,357	1.01089	1.89e-08
NM_001098636.1	Pwwp2b	PWWP domain containing 2B, transcript variant 1	17,16,20	37,29,40	1.01037	0.0152732
XR_873237.2	Gm4024	predicted pseudogene 4024	1274,1209,1231	2199,2187,2148	1.01034	2.68e-20
NM_028139.5	Atxn7l1	ataxin 7-like 1, transcript variant 2	375,374,360	677,665,620	1.01028	5.09e-13
NM_024473.3	BC005537	cDNA sequence BC005537	15270,13422,15890	25820,24903,27390	1.00934	3.79e-24
XM_006539426.2	LOC102638183	small nuclear ribonucleoprotein F	132,175,143	276,278,253	1.00895	1.52e-07
NM_010062.3	Dnase2a	deoxyribonuclease II alpha	4117,4460,4053	7648,7441,7135	1.0086	4.82e-19
XM_011242042.2	Rab20	RAB20, member RAS oncogene family, transcript variant X1	265,280,248	518,475,416	1.00858	1.37e-09
NM_010882.3	Ndn	necdin	18,24,13	51,40,22	1.00847	0.023267
NM_018771.3	Gipc1	GIPC PDZ domain containing family, member 1	2074,2131,1861	3872,3630,3198	1.00788	2.61e-14
NM_175648.2	Trim30b	tripartite motif-containing 30B	26,37,33	70,53,59	1.0074	0.00300916
XR_375938.3	Gm6485	predicted gene 6485	461,426,405	826,812,648	1.00695	7.09e-11
NM_025437.4	Eif1ax	eukaryotic translation initiation factor 1A, X-linked	1050,1194,1100	1983,1960,1940	1.00688	2.46e-17
NM_001190804.1	Dnajb11	DnaJ heat shock protein family (Hsp40) member B11, transcript variant 2	701,813,630	1353,1237,1201	1.0045	1.25e-11
NM_007763.3	Crip1	cysteine-rich protein 1 (intestinal)	6863,8643,6990	13743,13344,12525	1.00418	2.71e-14
NM_011874.2	Psmc4	proteasome (prosome, macropain) 26S subunit, ATPase, 4	2277,2603,2214	4247,4326,3888	1.00124	9.35e-16
NM_011890.4	Sgcb	sarcoglycan, beta (dystrophin-associated glycoprotein)	515,565,576	1020,904,968	0.995869	4.74e-14
XM_017321856.1	Gm40363	predicted gene, 40363, transcript variant X1	242,176,238	418,363,371	0.994908	1.14e-08
NM_007510.2	Atp6v1e1	ATPase, H+ transporting, lysosomal V1 subunit E1	4329,4643,4164	7948,7727,7223	0.994029	1.31e-17
NM_053267.2	Selm	selenoprotein M	113,177,125	289,248,207	0.992976	1.61e-05
NM_009790.5	Calm1	calmodulin 1, transcript variant 2	1663,1576,1697	2834,2994,2737	0.992096	3.61e-21
NR_004446.1	H2-K2	histocompatibility 2, K region locus 2	2385,2494,2189	4460,4155,3702	0.991251	2.94e-14
NM_010333.4	S1pr2	sphingosine-1-phosphate receptor 2	37,27,33	59,63,59	0.991134	0.00257968
NM_001033305.3	Ndufb6	NADH dehydrogenase (ubiquinone) 1 beta subcomplex, 6	717,793,678	1261,1381,1181	0.990196	1.72e-13
NM_007651.3	Cd53	CD53 antigen	16265,17108,16336	28919,28835,28791	0.990055	5.88e-23
NM_001285459.1	Fmn1	formin 1, transcript variant 4	118,51,176	170,210,247	0.989794	0.000796907
NM_145706.2	Nup43	nucleoporin 43	146,165,147	279,258,269	0.987051	6.3e-08
NM_198006.4	Coa5	cytochrome C oxidase assembly factor 5	4400,4075,4605	7576,7421,7563	0.986682	5.86e-24
NM_008013.4	Fgl2	fibrinogen-like protein 2	1139,1016,1277	1961,1877,2086	0.985228	1.01e-17
NM_024254.3	Katnbl1	katanin p80 subunit B like 1	500,504,436	872,847,788	0.984631	4.96e-12
NM_025878.1	Mrps18b	mitochondrial ribosomal protein S18B	150,132,129	238,255,230	0.984126	1.5e-07
NM_009226.4	Snrpd1	small nuclear ribonucleoprotein D1	693,885,767	1418,1376,1279	0.982147	2.2e-12
NM_008617.2	Mdh2	malate dehydrogenase 2, NAD (mitochondrial)	5618,5847,5250	9806,10119,8973	0.981649	2.02e-17
XM_017321857.1	Gm40367	predicted gene, 40367	62,48,48	112,90,84	0.981201	0.000557258
NR_030669.1	1700034H15Rik	RIKEN cDNA 1700034H15 gene	74,89,97	151,165,144	0.979124	1.2e-05
XM_017317138.1	Shisa9	shisa family member 9, transcript variant X2	30,13,22	31,51,45	0.97761	0.0167695
XR_001784844.1	LOC108169039	uncharacterized LOC108169039	28,28,33	46,55,65	0.97572	0.00439101
NR_132129.1	Gbp11	guanylate binding protein 11, transcript variant 1, non-coding	97,71,107	183,140,161	0.974594	3.26e-05
NM_026560.4	Cdca8	cell division cycle associated 8	167,190,162	286,342,278	0.972498	7.95e-08
XR_866351.1	Gm13552	predicted gene 13552	318,401,312	609,669,515	0.971931	1.26e-08
NM_011653.2	Tuba1a	tubulin, alpha 1A	8575,9093,8409	14871,15894,14047	0.971738	6.37e-19
NM_207648.1	H2-Q6	histocompatibility 2, Q region locus 6	7532,8021,7334	14318,12760,12166	0.970943	2.09e-15
NM_026618.2	Coa3	cytochrome C oxidase assembly factor 3	938,1013,900	1687,1706,1507	0.969816	5.16e-14
NM_008098.4	Mtpn	myotrophin	8625,7831,8796	13641,14561,14887	0.969631	8.65e-26
NR_040707.1	1110046J04Rik	RIKEN cDNA 1110046J04 gene	31,32,30	45,70,58	0.968533	0.00448579
XR_872946.2	Gm40559	predicted gene, 40559	18,11,14	38,21,28	0.968267	0.0357085
NM_011971.4	Psmb3	proteasome (prosome, macropain) subunit, beta type 3	2155,2290,1855	3703,3847,3284	0.967143	6.37e-13
NM_010235.2	Fosl1	fos-like antigen 1	36,16,29	46,63,44	0.966035	0.0108577
NM_016897.3	Timm23	translocase of inner mitochondrial membrane 23	1740,1828,1618	3120,2959,2798	0.965995	5.8e-15
XR_373795.2	Gm34882	predicted gene, 34882, transcript variant X2	12,11,20	32,26,28	0.96515	0.0334151
NM_010817.2	Psmd7	proteasome (prosome, macropain) 26S subunit, non-ATPase, 7	2548,2856,2508	4558,4720,4229	0.962561	9.87e-16
NM_026073.3	Ift22	intraflagellar transport 22	13,13,13	24,28,27	0.962043	0.0357062
NM_177229.3	Ncor1	nuclear receptor co-repressor 1, transcript variant 3	68,66,69	121,112,124	0.960459	7.41e-05
NM_031871.1	Ghdc	GH3 domain containing	86,75,66	135,132,132	0.958906	5.86e-05
NM_016662.4	Mxd3	Max dimerization protein 3	138,138,124	224,243,225	0.957823	3.96e-07
NM_144797.3	Metrnl	meteorin, glial cell differentiation regulator-like	5633,5911,5053	9912,9774,8590	0.957813	3.16e-14
NM_007687.5	Cfl1	cofilin 1, non-muscle	26229,27941,25372	45077,46663,43119	0.957062	1.38e-18
NM_026219.1	Uqcrb	ubiquinol-cytochrome c reductase binding protein	1286,1580,1306	2498,2285,2325	0.956773	1.62e-12
NM_053173.2	Kifc5b	kinesin family member C5B	62,67,70	115,112,122	0.955041	9.15e-05
NM_009779.2	C3ar1	complement component 3a receptor 1	18772,18552,19912	32921,31129,32615	0.954258	9.14e-23
NM_026759.3	Mrpl13	mitochondrial ribosomal protein L13	780,875,681	1368,1412,1212	0.953692	7.93e-11
NM_007747.2	Cox5a	cytochrome c oxidase subunit Va	2858,3218,2489	5207,4854,4537	0.953226	8.45e-12
NM_012037.2	Vat1	vesicle amine transport 1	19046,19336,19266	31760,33636,32003	0.953004	2.13e-23
NM_025384.3	Dnajc15	DnaJ heat shock protein family (Hsp40) member C15	480,603,464	1015,853,779	0.95183	2.04e-08
NM_027457.4	Tmem242	transmembrane protein 242	1055,1014,1009	1763,1819,1626	0.951769	7.13e-16
NM_016753.4	Lxn	latexin	453,441,393	767,739,685	0.951201	5.35e-11
NM_011968.3	Psma6	proteasome (prosome, macropain) subunit, alpha type 6	191,193,166	336,329,279	0.950977	1.89e-07
NM_027357.2	Psmd1	proteasome (prosome, macropain) 26S subunit, non-ATPase, 1	3721,3495,3782	6021,6364,6090	0.946694	7.28e-23
NM_022653.4	Thop1	thimet oligopeptidase 1	516,480,480	875,864,756	0.946054	7.34e-12
NM_011571.3	Tesk1	testis specific protein kinase 1	2044,2024,1780	3250,3447,3186	0.945665	2.06e-15
NM_008349.5	Il10rb	interleukin 10 receptor, beta	33,19,32	56,53,45	0.943586	0.00931165
NM_025434.3	Mrps28	mitochondrial ribosomal protein S28	252,328,277	481,516,461	0.943087	6.3e-09
NM_023294.2	Ndc80	NDC80 kinetochore complex component	84,74,84	135,134,149	0.942438	3.07e-05
NM_009794.3	Capn2	calpain 2	3149,3106,3131	5085,5396,5259	0.94206	9.22e-22
NM_020024.3	Taf10	TATA-box binding protein associated factor 10	67,85,58	130,116,122	0.941785	0.000252692
NM_011965.2	Psma1	proteasome (prosome, macropain) subunit, alpha type 1	3126,3264,2900	5379,5277,4965	0.941085	1.22e-15
NM_001034859.3	Gm4841	predicted gene 4841	52,43,91	135,116,77	0.94044	0.00272208
NM_001199967.1	Gm11127	predicted gene 11127	8839,14457,8042	17794,19695,19407	0.938198	0.00395155
NM_027959.3	Pdia6	protein disulfide isomerase associated 6	8418,8823,7917	14619,14098,13427	0.937624	3.09e-16
XR_001784283.1	LOC108168940	uncharacterized LOC108168940	103,99,131	169,187,213	0.936906	5.37e-06
NM_019580.4	Gde1	glycerophosphodiester phosphodiesterase 1	1467,1510,1398	2476,2560,2289	0.93513	2.6e-15
NM_008704.2	Nme1	NME/NM23 nucleoside diphosphate kinase 1	1556,1691,1440	2567,2835,2471	0.934967	8.5e-14
NM_009942.2	Cox5b	cytochrome c oxidase subunit Vb	2507,2780,2270	4369,4439,3884	0.934068	1.27e-12
NM_023785.3	Ppbp	pro-platelet basic protein	37,31,33	44,98,45	0.933835	0.0117987
NM_025872.4	Golt1b	golgi transport 1B	819,857,755	1367,1384,1324	0.933446	1.42e-13
NM_026267.2	Necap1	NECAP endocytosis associated 1	1368,1291,1345	2209,2184,2283	0.933249	2.37e-18
XR_384275.2	Gm32620	predicted gene, 32620	33,50,53	84,81,75	0.932579	0.00194354
NM_183170.2	Mpv17l2	MPV17 mitochondrial membrane protein-like 2	254,306,241	486,494,378	0.932402	2.76e-07
NM_010887.2	Ndufs4	NADH dehydrogenase (ubiquinone) Fe-S protein 4	984,1058,949	1744,1746,1502	0.928064	1.77e-12
NM_026268.3	Dusp6	dual specificity phosphatase 6	1045,905,930	1524,1735,1537	0.926233	1.74e-14
NM_026617.3	Tmbim4	transmembrane BAX inhibitor motif containing 4	1569,1852,1597	2946,2723,2695	0.926124	6.39e-13
NM_025301.2	Mrpl17	mitochondrial ribosomal protein L17	1085,1187,1077	1973,1890,1713	0.925527	6.06e-13
NM_001003672.1	Pcdhac2	protocadherin alpha subfamily C, 2	44,12,42	45,86,52	0.923423	0.0224919
XR_872943.1	LOC102631912	uncharacterized LOC102631912	1081,1221,1055	2052,1790,1743	0.922545	2.33e-11
NM_011188.3	Psmc2	proteasome (prosome, macropain) 26S subunit, ATPase 2	2905,3203,2808	4881,5131,4781	0.920217	1.56e-15
NR_040371.1	Gm14023	predicted gene 14023	95,56,87	142,131,133	0.91883	0.000222153
NM_172723.4	Adap1	ArfGAP with dual PH domains 1	61,56,49	84,97,107	0.918172	0.000700683
NM_026124.3	1110008F13Rik	RIKEN cDNA 1110008F13 gene	2047,1889,1586	3187,2978,3009	0.918022	1.17e-11
XR_881233.1	Gm16731	predicted gene, 16731	60,62,61	80,123,114	0.917741	0.000546559
XR_382374.1	Gm33168	predicted gene, 33168, transcript variant X2	246,296,257	470,420,443	0.917096	1.91e-08
XR_868818.2	Gm38773	predicted gene, 38773	31,41,37	61,73,59	0.916684	0.00438866
NM_019727.2	Snx1	sorting nexin 1	4354,4336,4137	7168,7024,6998	0.916605	4.34e-18
NR_028125.1	0610038B21Rik	RIKEN cDNA 0610038B21 gene	43,29,28	43,61,77	0.916428	0.00914436
NM_172574.2	Pqlc3	PQ loop repeat containing, transcript variant 1	988,1138,956	1734,1692,1683	0.915895	1.7e-12
NM_009439.1	Psmd3	proteasome (prosome, macropain) 26S subunit, non-ATPase, 3	3391,3657,3374	5801,5976,5397	0.913528	6.44e-16
NM_026436.3	Tmem86a	transmembrane protein 86A	3691,3588,3466	6476,5417,5768	0.910887	1.25e-13
NM_026464.2	Wdr55	WD repeat domain 55	124,132,112	201,210,207	0.910578	4.22e-06
NR_045810.1	4933408J17Rik	RIKEN cDNA 4933408J17 gene	53,75,71	112,121,107	0.909612	0.000390898
NM_026614.2	Ndufa5	NADH dehydrogenase (ubiquinone) 1 alpha subcomplex, 5, transcript variant 1	34,25,32	61,57,44	0.909548	0.00951515
NM_025647.3	Cmpk1	cytidine monophosphate (UMP-CMP) kinase 1	3397,3685,3460	5669,5869,5798	0.908436	4.49e-18
NM_027972.1	Cfap45	cilia and flagella associated protein 45	72,46,59	103,106,94	0.907492	0.0008275
NM_025462.2	Ece2	endothelin converting enzyme 2, transcript variant 3	113,156,109	223,223,192	0.907252	3.56e-05
NM_177596.3	Zfp947	zinc finger protein 947	66,54,61	93,109,107	0.907085	0.000425405
NM_008160.6	Gpx1	glutathione peroxidase 1	20327,23556,18875	36499,34738,32090	0.905814	6.18e-12
NM_013826.3	Mocs2	molybdenum cofactor synthesis 2, transcript variant 1	13,13,14	26,30,22	0.905496	0.0483968
NM_013551.2	Hmbs	hydroxymethylbilane synthase, transcript variant 1	48,37,42	80,75,65	0.9037	0.00302886
NM_009767.2	Chic1	cysteine-rich hydrophobic domain 1	258,303,320	476,441,535	0.903269	7.22e-09
NM_008062.2	G6pdx	glucose-6-phosphate dehydrogenase X-linked	8019,6980,7734	11972,12691,12410	0.902948	1.98e-20
NM_172133.1	Adap2	ArfGAP with dual PH domains 2	644,452,642	953,898,996	0.902618	6.82e-10
NM_019661.4	Ykt6	YKT6 v-SNARE homolog (S. cerevisiae)	3049,3099,3045	4868,5226,4894	0.900561	1.2e-18
NM_008199.2	H2-Bl	histocompatibility 2, blastocyst	2279,2655,2327	3960,4242,3689	0.900207	2.71e-13
NM_026114.3	Eif2s1	eukaryotic translation initiation factor 2, subunit 1 alpha	2227,2293,2201	3751,3659,3544	0.899393	3.54e-16
XR_380203.3	Gm36172	predicted gene, 36172	28,18,19	39,42,38	0.899369	0.022569
NM_023211.4	Usmg5	upregulated during skeletal muscle growth 5	893,1027,778	1652,1454,1338	0.899183	9.54e-09
NM_021539.4	Wsb2	WD repeat and SOCS box-containing 2	5285,5314,4924	8222,8756,8337	0.898214	2.04e-17
NM_025595.3	Mrpl51	mitochondrial ribosomal protein L51	1084,1273,999	1959,1859,1689	0.897668	5.42e-10
NM_145396.4	Tbl3	transducin (beta)-like 3	889,899,856	1425,1486,1401	0.897091	2.58e-14
NM_008303.4	Hspe1	heat shock protein 1 (chaperonin 10)	1172,1507,1117	2255,2061,1929	0.897066	5.46e-09
NM_001271395.1	Capg	capping protein (actin filament), gelsolin-like, transcript variant 3	213,218,175	298,359,348	0.897061	3.49e-07
NM_001143689.1	H2-Q4	histocompatibility 2, Q region locus 4	12166,12665,12393	21827,20432,18319	0.896163	1.72e-14
NM_008258.1	Hn1	hematological and neurological expressed sequence 1	3483,4101,3441	6303,6004,5657	0.892606	3.2e-12
NM_015786.3	Hist1h1c	histone cluster 1, H1c	1153,1420,1288	2202,2378,1726	0.891498	2.78e-09
NM_019936.3	Cript	cysteine-rich PDZ-binding protein	1042,1239,1008	1930,1727,1705	0.890191	3.14e-10
NM_011715.2	Wdr1	WD repeat domain 1	4880,5576,4688	8706,8293,7626	0.889975	3.61e-12
NM_015774.3	Ero1l	ERO1-like (S. cerevisiae)	1537,1492,1491	2460,2513,2340	0.888886	8.49e-16
NM_013733.3	Chaf1a	chromatin assembly factor 1, subunit A (p150)	275,233,225	368,444,388	0.886419	6.86e-08
NM_138310.1	Apobr	apolipoprotein B receptor	660,652,696	1063,1161,1020	0.884476	3.11e-13
XR_001779637.1	Gm37168	predicted gene, 37168	33,14,33	46,54,43	0.884408	0.0217485
NM_001033279.3	D17Wsu92e	DNA segment, Chr 17, Wayne State University 92, expressed, transcript variant 1	119,91,107	167,172,184	0.883892	2.51e-05
NM_013899.2	Timm10	translocase of inner mitochondrial membrane 10	312,317,286	525,498,464	0.882443	1.32e-08
NM_029635.3	Commd9	COMM domain containing 9	821,910,750	1369,1356,1298	0.882412	6.53e-11
NM_011432.2	Snrpc	U1 small nuclear ribonucleoprotein C	846,930,784	1497,1427,1227	0.882164	9.76e-10
NM_007638.4	Cct7	chaperonin containing Tcp1, subunit 7 (eta)	4499,4951,4489	7556,7752,7208	0.881151	3.13e-15
NM_029720.2	Creld2	cysteine-rich with EGF-like domains 2	1640,1962,1589	2936,2817,2653	0.881053	7.13e-11
NM_025959.3	Psmc6	proteasome (prosome, macropain) 26S subunit, ATPase, 6	1992,2144,2029	3374,3316,3235	0.88086	2.9e-15
NM_007507.2	Atp5k	ATP synthase, H+ transporting, mitochondrial F1F0 complex, subunit E	1194,1505,1204	2182,2216,1931	0.880044	6.54e-10
NM_026329.2	Polr2g	polymerase (RNA) II (DNA directed) polypeptide G	1367,1536,1341	2341,2313,2193	0.879417	1.36e-12
NM_013642.3	Dusp1	dual specificity phosphatase 1	1352,1298,1345	2138,2465,1831	0.879129	2.55e-11
NM_008231.4	Hdgf	hepatoma-derived growth factor	228,179,150	317,289,308	0.878298	8.55e-06
NM_026064.2	Myl12a	myosin, light chain 12A, regulatory, non-sarcomeric	111,104,80	169,155,165	0.878114	0.000118858
NM_026063.2	Uqcc2	ubiquinol-cytochrome c reductase complex assembly factor 2	123,133,110	219,195,187	0.87653	2.74e-05
NM_146235.3	Ercc6l	excision repair cross-complementing rodent repair deficiency complementation group 6 like	78,86,62	116,142,120	0.875702	0.000467947
NM_011738.2	Ywhah	tyrosine 3-monooxygenase/tryptophan 5-monooxygenase activation protein, eta polypeptide	5927,6310,5628	9561,9918,9254	0.875031	4.48e-15
NM_173742.3	Rnasek	ribonuclease, RNase K	2309,2744,2238	4046,4253,3462	0.874128	2.99e-10
NM_025615.2	2810004N23Rik	RIKEN cDNA 2810004N23 gene	568,565,616	927,939,937	0.873969	3.93e-13
XM_017317770.1	Gm2808	predicted gene 2808	2023,1272,2537	2573,3204,3653	0.873454	1.27e-06
NM_026305.2	Tceb2	transcription elongation factor B (SIII), polypeptide 2	2093,2345,1793	3518,3558,2989	0.87298	1.88e-09
XM_017315182.1	Inf2	inverted formin, FH2 and WH2 domain containing, transcript variant X2	309,332,266	460,506,505	0.872801	3.08e-08
NM_177470.3	Acaa2	acetyl-Coenzyme A acyltransferase 2 (mitochondrial 3-oxoacyl-Coenzyme A thiolase)	1779,2114,1697	3063,2990,2947	0.872286	3.65e-11
NM_145152.4	Lrrc3	leucine rich repeat containing 3	45,39,43	74,58,84	0.872162	0.00481603
NM_007644.4	Scarb2	scavenger receptor class B, member 2	9612,9122,9678	15272,14790,15315	0.871639	2.2e-19
NM_198108.2	Morn4	MORN repeat containing 4	26,15,14	32,29,41	0.871598	0.0422883
NM_001159724.1	Nectin2	nectin cell adhesion molecule 2, transcript variant 2	32,28,26	46,49,55	0.868746	0.0138041
NR_033611.1	Gm12669	predicted gene 12669	43,60,36	71,76,91	0.86869	0.00511304
NM_008945.3	Psmb4	proteasome (prosome, macropain) subunit, beta type 4	4139,4778,3931	7084,7214,6298	0.867509	2.66e-11
NM_001001491.1	Tpm4	tropomyosin 4	9044,8928,8548	13876,14960,13462	0.867222	1.8e-16
NM_028049.2	Fbxo22	F-box protein 22	190,176,217	310,332,296	0.867038	2.42e-07
NM_025799.4	Fuca2	fucosidase, alpha-L- 2, plasma	167,176,161	286,259,270	0.866521	1.59e-06
NM_013759.2	Msrb1	methionine sulfoxide reductase B1	6014,6466,5223	9965,9231,9137	0.86498	3.08e-11
XR_868594.1	Gm40346	predicted gene, 40346	59,34,34	68,78,71	0.864188	0.00741566
XR_389973.3	LOC102635948	uncharacterized LOC102635948, transcript variant X1	29,22,22	42,50,37	0.862987	0.0232614
NM_025774.3	Prkrip1	Prkr interacting protein 1 (IL11 inducible)	382,416,319	628,627,544	0.862851	1.66e-07
NM_146119.2	Fam129b	family with sequence similarity 129, member B	17599,19062,18709	28126,31430,28453	0.862338	1.73e-17
NM_001310688.1	Ntpcr	nucleoside-triphosphatase, cancer-related, transcript variant 2	53,63,52	104,83,93	0.862073	0.00198609
NM_023223.2	Cdc20	cell division cycle 20	110,110,107	182,186,163	0.861627	3.44e-05
NM_010481.2	Hspa9	heat shock protein 9	6281,6323,6565	9919,10252,10169	0.860772	8.38e-20
NM_009838.2	Cct6a	chaperonin containing Tcp1, subunit 6a (zeta)	3486,3487,3407	5470,5617,5373	0.860096	8.66e-17
NM_008044.2	Fxn	frataxin	109,125,108	190,202,164	0.859619	5.14e-05
XR_869219.1	Gm38676	predicted gene, 38676	100,104,100	165,178,151	0.859125	5.97e-05
NM_019932.4	Pf4	platelet factor 4	10824,11654,9160	18517,16364,15551	0.857509	1.07e-09
NM_019639.4	Ubc	ubiquitin C	123452,116867,129132	189907,199160,192555	0.856845	4.83e-21
NM_001033313.3	Pdap1	PDGFA associated protein 1	1653,1939,1696	2912,2914,2576	0.85683	3.11e-11
NM_011337.2	Ccl3	chemokine (C-C motif) ligand 3	894,1258,909	1543,1794,1576	0.856712	5.84e-08
XM_011244243.2	Gm5785	predicted gene 5785	231,197,200	351,336,318	0.856461	4.94e-07
NM_025606.3	Mrpl16	mitochondrial ribosomal protein L16	499,495,442	758,791,738	0.856361	4.98e-10
NM_029271.2	Mrpl32	mitochondrial ribosomal protein L32	471,468,455	739,776,700	0.856268	1.48e-10
NM_009846.2	Cd24a	CD24a antigen	2334,2657,2408	3703,4137,3890	0.856093	3.88e-14
NM_001290420.1	Ccnc	cyclin C, transcript variant 3	41,57,47	78,91,74	0.855974	0.00370463
NM_021502.2	Trappc2l	trafficking protein particle complex 2-like	1256,1502,1155	2062,2212,1972	0.855572	1.1e-09
NM_007508.5	Atp6v1a	ATPase, H+ transporting, lysosomal V1 subunit A	285,371,313	577,498,475	0.854828	6.49e-07
NM_025523.1	Ndufc1	NADH dehydrogenase (ubiquinone) 1, subcomplex unknown, 1	528,620,484	982,865,761	0.854004	2.4e-07
NM_001045526.2	Scimp	SLP adaptor and CSK interacting membrane protein	136,180,155	279,220,260	0.853492	2.5e-05
NM_011434.1	Sod1	superoxide dismutase 1, soluble	5118,6692,5366	9374,9309,8485	0.853471	7.01e-10
NM_013898.3	Timm8a1	translocase of inner mitochondrial membrane 8A1	408,383,385	609,709,553	0.853454	8.47e-09
NM_001207021.1	Shisa8	shisa family member 8	559,625,521	908,1033,779	0.851784	3.33e-08
NM_008948.2	Psmc3	proteasome (prosome, macropain) 26S subunit, ATPase 3	3105,3624,2985	5220,5360,4820	0.851382	3.1e-11
XM_001473957.5	Nutf2-ps2	nuclear transport factor 2, pseudogene 2	361,426,356	605,655,559	0.849505	3.52e-08
NM_025665.2	Snrnp27	small nuclear ribonucleoprotein 27 (U4/U6.U5)	729,894,715	1314,1239,1151	0.846814	9.85e-09
NM_027204.2	Mrpl12	mitochondrial ribosomal protein L12	1232,1497,1153	1994,2214,1953	0.846675	1.75e-09
NR_033574.1	Nutf2-ps1	nuclear transport factor 2, pseudogene 1	593,736,622	1072,1076,939	0.845209	7.79e-09
NM_201373.4	Trim56	tripartite motif-containing 56	202,124,301	273,322,416	0.844717	0.000486241
XM_017312234.1	Trim5	tripartite motif-containing 5, transcript variant X3	27,37,52	75,63,57	0.844169	0.0122826
NM_178643.5	Faap24	Fanconi anemia core complex associated protein 24	209,274,246	378,397,383	0.843616	4.34e-07
NM_181344.5	C1rl	complement component 1, r subcomponent-like	271,105,136	285,274,278	0.841574	0.00175672
NM_028791.6	Cmtr1	cap methyltransferase 1	71,65,77	97,130,119	0.841165	0.000660216
NM_172580.1	Acot6	acyl-CoA thioesterase 6	32,22,23	45,35,54	0.840691	0.0276755
NM_026845.4	Ppil1	peptidylprolyl isomerase (cyclophilin)-like 1	468,519,439	754,753,742	0.84066	2.83e-09
NM_009450.2	Tubb2a	tubulin, beta 2A class IIA	5166,5882,5247	8751,9116,7706	0.840381	9.22e-12
XR_385197.1	Gm33799	predicted gene, 33799, transcript variant X2	67,63,67	84,121,117	0.840125	0.00118271
NM_178856.1	Gins2	GINS complex subunit 2 (Psf2 homolog)	161,172,140	269,284,204	0.839315	5.15e-05
NM_029101.4	Rrp7a	ribosomal RNA processing 7 homolog A (S. cerevisiae)	1662,1955,1646	2828,2829,2611	0.839202	7.93e-11
NM_023126.2	Rab8a	RAB8A, member RAS oncogene family	3403,3818,3357	5521,5568,5497	0.838855	2.62e-13
NM_026502.2	1110004E09Rik	RIKEN cDNA 1110004E09 gene	217,273,238	395,390,367	0.838498	6.53e-07
XM_006524695.3	Brd4	bromodomain containing 4, transcript variant X13	329,305,281	475,475,493	0.83835	2.98e-08
NM_011479.4	Sptlc2	serine palmitoyltransferase, long chain base subunit 2	3857,4023,3812	6034,6455,5801	0.837745	9.36e-15
NM_009906.6	Tpp1	tripeptidyl peptidase I	5883,6421,5679	9620,9269,9265	0.837574	2.76e-13
NM_027335.1	2210016F16Rik	RIKEN cDNA 2210016F16 gene	1360,1459,1266	2170,2159,2073	0.837028	1.31e-11
NM_138591.2	Gfm1	G elongation factor, mitochondrial 1	1053,954,1065	1538,1642,1611	0.836784	1.57e-14
NM_023371.3	Pin1	protein (peptidyl-prolyl cis/trans isomerase) NIMA-interacting 1	1031,1162,978	1709,1749,1521	0.836682	6.61e-10
XM_006520926.3	Phf20l1	PHD finger protein 20-like 1, transcript variant X18	69,79,67	110,117,121	0.834516	0.000701599
NM_025567.2	Cyc1	cytochrome c-1	2741,2791,2260	4106,4324,3796	0.83386	3.68e-10
NM_026115.4	Hat1	histone aminotransferase 1	682,710,707	1104,1166,1006	0.833097	5.31e-11
NM_028402.2	Zfp493	zinc finger protein 493	115,96,108	179,161,167	0.831567	9.01e-05
NM_033444.2	Clic1	chloride intracellular channel 1	10600,11790,10139	17258,17500,15937	0.830516	3.74e-12
NM_001009927.2	Mief2	mitochondrial elongation factor 2	282,314,268	483,450,424	0.830183	3.52e-07
NM_181075.3	2610524H06Rik	RIKEN cDNA 2610524H06 gene	158,186,158	286,267,240	0.828598	1.51e-05
NM_172530.3	She	src homology 2 domain-containing transforming protein E	196,149,222	326,288,275	0.828191	1.25e-05
NM_011239.2	Ranbp1	RAN binding protein 1	1475,1755,1474	2563,2460,2312	0.828015	4.36e-10
NM_032002.2	Nrg4	neuregulin 4	159,158,220	261,296,286	0.827561	5.06e-06
NM_031195.2	Msr1	macrophage scavenger receptor 1, transcript variant 1	10063,10421,9850	16218,14854,15926	0.82521	4.36e-14
NR_037854.1	Atp6v0c-ps2	ATPase, H+ transporting, lysosomal V0 subunit C, pseudogene 2	33618,34304,30050	52889,52600,45079	0.824424	1.06e-10
NM_138607.3	Fam50a	family with sequence similarity 50, member A	1744,1906,1656	2751,2776,2708	0.823614	6.45e-12
NM_025315.3	Med21	mediator complex subunit 21	343,475,370	650,636,576	0.823402	1.07e-06
NM_001081226.1	2310009B15Rik	RIKEN cDNA 2310009B15 gene	171,160,165	266,295,218	0.821681	1.76e-05
NR_015472.1	9530082P21Rik	RIKEN cDNA 9530082P21 gene	238,229,235	400,358,336	0.821483	9.13e-07
NM_145578.3	Ube2m	ubiquitin-conjugating enzyme E2M, transcript variant 1	142,98,84	167,212,142	0.820557	0.00122184
NM_177682.3	Ccz1	CCZ1 vacuolar protein trafficking and biogenesis associated	163,111,156	219,257,200	0.819395	7.28e-05
XM_006505248.3	Wdr91	WD repeat domain 91, transcript variant X1	1169,1289,1092	1806,1894,1805	0.816791	7.09e-11
NM_027250.4	Coa7	cytochrome c oxidase assembly factor 7	236,236,272	390,416,348	0.816724	3.89e-07
NM_027246.1	Snrpf	small nuclear ribonucleoprotein polypeptide F	272,299,255	404,469,413	0.814746	3.53e-07
NM_145944.4	Ccdc25	coiled-coil domain containing 25	740,813,808	1229,1189,1213	0.813488	2.14e-11
NM_016737.2	Stip1	stress-induced phosphoprotein 1	2325,2384,2329	3614,3724,3460	0.81242	4.94e-14
NM_010359.2	Gstm3	glutathione S-transferase, mu 3	74,63,63	105,111,103	0.812377	0.00141566
NM_001031808.2	Mrpl41	mitochondrial ribosomal protein L41	522,610,512	905,830,807	0.812246	3.65e-08
NM_026826.1	Mrps18c	mitochondrial ribosomal protein S18C	748,818,604	1132,1134,1099	0.810474	8.65e-08
NM_010391.4	H2-Q10	histocompatibility 2, Q region locus 10	342,336,267	535,498,436	0.81031	3.7e-06
NM_172697.3	Prpf38a	PRP38 pre-mRNA processing factor 38 (yeast) domain containing A	654,875,770	1246,1165,1132	0.808811	3.49e-08
NM_009787.2	Pdia4	protein disulfide isomerase associated 4	943,911,1058	1393,1495,1565	0.808247	2.82e-13
NM_134007.4	Cisd1	CDGSH iron sulfur domain 1	483,546,429	809,779,666	0.806315	5.65e-07
NM_025358.3	Ndufa9	NADH dehydrogenase (ubiquinone) 1 alpha subcomplex, 9	1451,1534,1473	2299,2275,2237	0.805229	8.4e-13
NM_026774.2	Lamtor5	late endosomal/lysosomal adaptor, MAPK and MTOR activator 5	1589,1729,1385	2515,2398,2314	0.80479	3.07e-09
NM_009673.2	Anxa5	annexin A5	10341,11041,10348	15790,16661,16004	0.804697	5.8e-15
NM_175109.3	Rps19bp1	ribosomal protein S19 binding protein 1	583,693,554	937,999,883	0.803904	4.22e-08
NR_040766.1	9430037G07Rik	RIKEN cDNA 9430037G07 gene	27,25,22	43,40,42	0.801776	0.0339764
NM_023377.4	Stard5	StAR-related lipid transfer (START) domain containing 5	1700,1873,1695	2658,2664,2718	0.801552	3.25e-12
NM_008367.3	Il2ra	interleukin 2 receptor, alpha chain	240,298,312	383,487,440	0.80155	7.88e-07
XM_006496590.1	Gm35498	predicted gene, 35498	1383,1580,1542	2240,2342,2285	0.801234	1.32e-12
NM_013587.2	Lrpap1	low density lipoprotein receptor-related protein associated protein 1	5608,5668,5430	8747,8691,8043	0.800419	2.16e-13
NM_023172.3	Ndufb9	NADH dehydrogenase (ubiquinone) 1 beta subcomplex, 9	1692,2010,1535	2807,2806,2424	0.799157	4.38e-08
NM_001085518.1	Gm14085	predicted gene 14085	1430,1598,1292	2486,2038,2086	0.798083	7.19e-08
NM_026703.2	Ndufa8	NADH dehydrogenase (ubiquinone) 1 alpha subcomplex, 8	1353,1634,1284	2238,2309,1997	0.797847	2.07e-08
NM_080456.1	Mrps6	mitochondrial ribosomal protein S6	299,387,303	557,510,457	0.797115	5.47e-06
NM_029774.2	Ttll11	tubulin tyrosine ligase-like family, member 11	27,20,33	42,55,37	0.796426	0.0355471
NM_008251.3	Hmgn1	high mobility group nucleosomal binding domain 1	2920,3252,3066	4801,4825,4405	0.796356	4.5e-12
NM_025569.1	Mgst3	microsomal glutathione S-transferase 3	276,310,260	441,439,418	0.795448	7.92e-07
NM_024227.3	Mrpl28	mitochondrial ribosomal protein L28	975,1230,1041	1834,1618,1503	0.794902	9.15e-08
NM_134013.3	Psme4	proteasome (prosome, macropain) activator subunit 4	1633,1796,1597	2610,2497,2533	0.794883	4.11e-11
NM_020003.1	Glmp	glycosylated lysosomal membrane protein	8637,9787,8429	14011,14180,12645	0.794549	8.49e-11
NM_172685.3	Slc25a24	solute carrier family 25 (mitochondrial carrier, phosphate carrier), member 24	1639,1445,1671	2324,2387,2480	0.794135	4.96e-14
NM_144818.3	Ncaph	non-SMC condensin I complex, subunit H	146,155,146	216,245,228	0.793334	1.91e-05
NR_002445.2	BC002163	cDNA sequence BC002163	115,113,80	175,184,126	0.793142	0.00163563
NM_016774.3	Atp5b	ATP synthase, H+ transporting mitochondrial F1 complex, beta subunit	16904,17182,15908	25335,25850,24647	0.792819	8.5e-14
NM_027130.1	Afg3l2	AFG3-like AAA ATPase 2	69,38,63	72,107,93	0.792367	0.00767926
NM_184053.3	Calu	calumenin, transcript variant 2	63,49,76	90,89,118	0.792286	0.00387978
NM_011760.2	Zfp54	zinc finger protein 54	97,96,110	163,163,143	0.792	0.000269846
NR_040328.1	4833419F23Rik	RIKEN cDNA 4833419F23 gene	52,64,57	91,89,94	0.791664	0.00366491
NM_009729.3	Atp6v0c	ATPase, H+ transporting, lysosomal V0 subunit C	28241,29899,25051	44436,44442,37498	0.791521	1.72e-09
NM_020491.5	Sssca1	Sjogren's syndrome/scleroderma autoantigen 1 homolog (human)	265,289,242	465,401,354	0.790768	1.3e-05
XM_017314274.1	Gngt2	guanine nucleotide binding protein (G protein), gamma transducing activity polypeptide 2, transcript variant X1	437,433,405	731,602,607	0.790515	3.85e-07
NM_175562.3	Rab39	RAB39, member RAS oncogene family	305,329,346	508,458,524	0.790515	1.11e-07
NM_199447.2	Rrp12	ribosomal RNA processing 12 homolog (S. cerevisiae)	591,543,591	867,926,819	0.79033	5.62e-10
NM_009840.3	Cct8	chaperonin containing Tcp1, subunit 8 (theta)	5168,5430,5184	7934,8089,7815	0.789982	3.49e-14
NM_007952.2	Pdia3	protein disulfide isomerase associated 3	20525,21894,20098	32704,30851,31167	0.789394	7.74e-13
NM_145450.3	BC022687	cDNA sequence BC022687	106,92,74	140,153,132	0.787247	0.00104175
NM_145135.3	Rnh1	ribonuclease/angiogenin inhibitor 1, transcript variant 1	98,95,96	125,173,151	0.786342	0.000450442
NM_009011.4	Rad23b	RAD23 homolog B, nucleotide excision repair protein	3969,3741,3905	5554,5956,5960	0.785544	4.5e-16
NM_001033242.1	Cln5	ceroid-lipofuscinosis, neuronal 5	3553,3387,3188	5097,5024,5173	0.785247	9.71e-13
NR_003559.1	Mrpl48	mitochondrial ribosomal protein L48	48,35,46	66,68,72	0.785237	0.010535
NR_015470.1	2610203C22Rik	RIKEN cDNA 2610203C22 gene	145,117,125	191,208,195	0.783927	8.15e-05
NM_019667.2	Stam2	signal transducing adaptor molecule (SH3 domain and ITAM motif) 2	57,62,65	99,81,109	0.78378	0.00384517
NM_133225.3	Acbd3	acyl-Coenzyme A binding domain containing 3	2168,1849,2162	2891,3237,3155	0.783619	9.75e-14
NM_175488.6	Ccdc38	coiled-coil domain containing 38	121,158,128	204,227,196	0.782925	0.000145829
NM_019879.3	Suclg1	succinate-CoA ligase, GDP-forming, alpha subunit	1583,1702,1475	2383,2390,2408	0.782288	9.14e-11
NM_178376.3	Rraga	Ras-related GTP binding A	1884,1979,1883	2902,3022,2716	0.781562	7.65e-12
NM_025614.3	Rwdd1	RWD domain containing 1	1107,1347,1028	1862,1729,1685	0.781084	1.15e-07
NM_001205057.2	Gm14295	predicted gene 14295	68,47,50	94,84,82	0.778378	0.00699186
NM_013822.5	Jag1	jagged 1	58,39,57	65,93,86	0.778254	0.00863287
XM_011247950.2	Sp100	nuclear antigen Sp100, transcript variant X11	117,65,143	146,168,189	0.778072	0.00229706
NM_011227.1	Rab20	RAB20, member RAS oncogene family	66,53,58	89,103,85	0.776311	0.00435442
NM_025535.2	Sar1b	secretion associated Ras related GTPase 1B	1116,1189,1060	1784,1635,1623	0.775695	2.17e-09
NM_024190.2	Chmp1b	charged multivesicular body protein 1B	2550,2642,2656	4031,3836,3857	0.775445	6.25e-13
NM_019748.3	Sae1	SUMO1 activating enzyme subunit 1, transcript variant 1	534,709,577	979,934,836	0.774165	9.2e-07
XM_017314849.1	Gas2l1	growth arrest-specific 2 like 1, transcript variant X1	44,38,46	67,52,85	0.772163	0.0163876
NM_025942.2	Ola1	Obg-like ATPase 1, transcript variant 1	620,723,641	1024,989,961	0.771105	1.43e-08
NM_024472.4	Cptp	ceramide-1-phosphate transfer protein	357,407,348	562,552,559	0.770859	2.6e-07
NM_001171034.1	Tmbim6	transmembrane BAX inhibitor motif containing 6, transcript variant 1	36,23,37	51,50,54	0.770493	0.0280448
NM_029573.2	Idh3a	isocitrate dehydrogenase 3 (NAD+) alpha	974,928,934	1346,1415,1468	0.768908	1.23e-11
XR_388732.2	Gm36874	predicted gene, 36874	30,33,33	46,56,53	0.768738	0.0251104
NM_023716.2	Tubb2b	tubulin, beta 2B class IIB	2131,2561,2223	3503,3781,3066	0.768363	1.05e-08
NM_007573.2	C1qbp	complement component 1, q subcomponent binding protein	1739,1722,1663	2499,2715,2421	0.768007	1.04e-11
NR_045995.1	1110019D14Rik	RIKEN cDNA 1110019D14 gene	64,89,86	125,111,132	0.766165	0.00219366
NM_001110807.1	Capn12	calpain 12	186,220,148	284,279,280	0.764909	0.000137825
NM_025392.2	Bccip	BRCA2 and CDKN1A interacting protein	1103,1302,1174	1810,1858,1670	0.764813	2.31e-09
NM_009945.3	Cox7a2	cytochrome c oxidase subunit VIIa 2	1883,2100,1748	2877,2961,2711	0.764108	2.36e-09
NM_010401.4	Hal	histidine ammonia lyase	8278,7123,8778	11482,12282,11984	0.76393	2.2e-14
NM_008621.3	Mpp1	membrane protein, palmitoylated	6858,7564,7172	11175,10259,10649	0.763221	9.64e-12
NM_019980.2	Litaf	LPS-induced TN factor	88,120,90	165,161,131	0.761856	0.0016626
NM_025379.2	Cox7b	cytochrome c oxidase subunit VIIb	1683,1990,1651	2608,2779,2548	0.761777	3.24e-09
NM_001042407.1	Pex10	peroxisomal biogenesis factor 10	190,195,200	321,325,234	0.761646	8.03e-05
NM_011695.2	Vdac2	voltage-dependent anion channel 2	8176,8461,7750	12421,12247,11485	0.761342	1.56e-11
NM_028028.2	Zswim1	zinc finger SWIM-type containing 1	331,322,336	498,540,437	0.761217	6.11e-07
NM_008131.4	Glul	glutamate-ammonia ligase (glutamine synthetase)	13088,11979,11710	17715,19225,17601	0.760522	9.24e-13
NM_024206.4	Sec13	SEC13 homolog, nuclear pore and COPII coat complex component	2232,2315,2172	3390,3418,3144	0.759944	3.58e-11
NM_011712.2	Wbp5	WW domain binding protein 5	1080,1309,1225	1798,1804,1759	0.759767	1.1e-09
NM_013477.3	Atp6v0d1	ATPase, H+ transporting, lysosomal V0 subunit D1	6874,7413,6540	10471,10553,9871	0.75963	4.99e-11
NR_040348.1	4930473A02Rik	RIKEN cDNA 4930473A02 gene	614,675,633	928,967,959	0.759478	1.63e-09
NM_029545.2	Dtd2	D-tyrosyl-tRNA deacylase 2	65,78,64	107,113,99	0.759331	0.00342699
NM_009634.6	Adsl	adenylosuccinate lyase	1164,1164,1190	1668,1840,1696	0.75888	5.91e-12
XR_879463.2	Gm42059	predicted gene, 42059, transcript variant X1	122,116,97	181,152,176	0.758742	0.000646482
NM_145937.3	Sumf1	sulfatase modifying factor 1	1429,1541,1387	2223,2141,2093	0.758343	4.66e-10
NM_025936.3	Rars	arginyl-tRNA synthetase	1978,2021,1984	2913,3059,2870	0.758339	1.54e-12
XR_881001.2	Gm10575	predicted gene 10575, transcript variant X2	55,59,47	75,74,103	0.757402	0.00985027
NR_126558.1	E230013L22Rik	RIKEN cDNA E230013L22 gene	199,174,188	300,274,264	0.756703	2.31e-05
NM_011723.3	Xdh	xanthine dehydrogenase	2974,1814,3661	3655,4071,4841	0.756436	2.8e-05
NM_024438.4	Dusp19	dual specificity phosphatase 19	108,119,127	186,194,154	0.756429	0.000384157
NM_010730.2	Anxa1	annexin A1	8259,8691,7738	12233,12308,11947	0.75524	1.53e-11
NR_002700.1	Gm7334	predicted gene 7334	219,297,230	403,351,365	0.754998	4.83e-05
XR_867911.2	Gm12693	predicted gene 12693	282,314,270	439,446,406	0.754861	2.68e-06
NM_080633.2	Aco2	aconitase 2, mitochondrial	6352,5967,5889	8707,9137,8971	0.753681	1.3e-13
NM_145480.1	Rfc4	replication factor C (activator 1) 4	168,181,171	248,303,229	0.753586	6.67e-05
NM_178242.2	Tnrc18	trinucleotide repeat containing 18, transcript variant B	47,40,27	68,58,56	0.753127	0.0282586
NM_025892.2	Cep19	centrosomal protein 19	190,242,207	305,320,330	0.751782	1.81e-05
NM_010073.2	Dpm2	dolichol-phosphate (beta-D) mannosyltransferase 2	871,1019,813	1409,1391,1210	0.751372	3.58e-07
NM_146036.1	Ahsa1	AHA1, activator of heat shock protein ATPase 1	159,161,182	225,287,238	0.75128	4.36e-05
NM_133726.2	St13	suppression of tumorigenicity 13	4509,4349,4754	6338,6840,6783	0.750736	1.19e-15
NM_025982.4	Tspan31	tetraspanin 31	3009,3342,2762	4694,4498,4269	0.750538	6.69e-09
NM_019712.3	Rbx1	ring-box 1	1777,2048,1687	2895,2829,2427	0.750053	8.49e-08
NM_144916.3	Tmem150a	transmembrane protein 150A	280,294,260	419,442,378	0.749503	4.18e-06
NM_010360.2	Gstm5	glutathione S-transferase, mu 5	107,112,84	137,146,178	0.748688	0.00139085
NM_007682.3	Cenpb	centromere protein B	9264,9582,8737	14062,13532,12911	0.747723	6.45e-11
NM_016714.2	Nup50	nucleoporin 50	1648,1617,1725	2378,2431,2493	0.747241	3.86e-13
NM_016859.3	Bysl	bystin-like	744,796,787	1081,1257,1086	0.746911	1.84e-09
NM_011361.3	Sgk1	serum/glucocorticoid regulated kinase 1, transcript variant 6	50,32,51	72,53,83	0.746808	0.0222606
NM_030238.2	Dync1h1	dynein cytoplasmic 1 heavy chain 1	14766,12961,17110	20208,21940,23344	0.746111	3.02e-12
NM_011192.3	Psme3	proteaseome (prosome, macropain) activator subunit 3 (PA28 gamma, Ki)	121,119,152	196,219,170	0.74548	0.000329601
NM_025885.3	Med19	mediator complex subunit 19	471,585,535	794,764,787	0.745389	1.54e-07
NM_019772.2	1110004F10Rik	RIKEN cDNA 1110004F10 gene	144,168,182	221,279,236	0.74522	7.69e-05
XR_378049.3	1700018A23Rik	RIKEN cDNA 1700018A23 gene	117,131,91	189,176,148	0.744723	0.00169513
NM_010948.3	Nudc	nudC nuclear distribution protein	1954,2158,1935	3065,3022,2787	0.743855	1.16e-09
XR_385567.3	LOC102635200	uncharacterized LOC102635200, transcript variant X1	318,345,361	474,543,491	0.743794	2.42e-07
NM_023331.2	Mrpl46	mitochondrial ribosomal protein L46	511,530,416	774,736,647	0.74365	4.97e-06
NM_019713.4	Rassf1	Ras association (RalGDS/AF-6) domain family member 1, transcript variant 2	93,77,77	128,120,125	0.743104	0.00203409
NM_023065.3	Ifi30	interferon gamma inducible protein 30	11779,13101,11099	17522,18443,16790	0.742107	5.95e-10
NM_025602.3	Ccdc59	coiled-coil domain containing 59	617,692,638	1008,971,879	0.741521	8.11e-08
NM_023231.2	Stoml2	stomatin (Epb7.2)-like 2	1153,1199,1097	1724,1719,1604	0.740084	1.83e-09
NM_183017.2	Ttll12	tubulin tyrosine ligase-like family, member 12	638,697,674	965,1009,966	0.739805	2.81e-09
NM_133787.2	Nmd3	NMD3 ribosome export adaptor	768,738,716	1129,1124,999	0.739378	1.74e-08
NM_001085522.2	Gm13251	predicted gene 13251	1696,1309,1752	2266,2181,2486	0.739159	4.12e-09
NM_008564.2	Mcm2	minichromosome maintenance complex component 2	757,734,797	1041,1212,1089	0.739041	4.34e-10
NM_026211.3	Tmed9	transmembrane emp24 protein transport domain containing 9	3999,4295,3941	5958,6258,5649	0.738608	6.55e-11
NM_008869.4	Pla2g4a	phospholipase A2, group IVA (cytosolic, calcium-dependent), transcript variant 1	32,23,51	53,55,59	0.738495	0.0377626
NM_026312.5	Pbdc1	polysaccharide biosynthesis domain containing 1, transcript variant 1	429,463,392	649,630,607	0.737211	7.66e-07
NM_026631.3	Nhp2	NHP2 ribonucleoprotein	1159,1246,1122	1775,1829,1551	0.73709	1.93e-08
NM_025366.3	Chchd1	coiled-coil-helix-coiled-coil-helix domain containing 1	662,778,617	1045,1061,916	0.735855	1.12e-06
NM_001048146.2	Azi2	5-azacytidine induced gene 2, transcript variant 2	65,44,77	102,91,89	0.735544	0.00951515
NM_026816.3	Gtf2f2	general transcription factor IIF, polypeptide 2	565,651,590	925,868,848	0.735034	1.16e-07
NM_009665.5	Amd1	S-adenosylmethionine decarboxylase 1	1394,1600,1447	2081,2133,2267	0.734887	5.91e-10
NM_138597.2	Atp5o	ATP synthase, H+ transporting, mitochondrial F1 complex, O subunit	2957,3348,2793	4555,4638,4097	0.734149	1.47e-08
NM_025548.3	Tbcb	tubulin folding cofactor B	154,180,135	239,245,213	0.73273	0.000324761
NM_031376.3	Pik3ap1	phosphoinositide-3-kinase adaptor protein 1	437,260,620	547,660,738	0.732463	0.000821117
NM_024434.6	Lap3	leucine aminopeptidase 3	1020,1052,1101	1587,1554,1463	0.732374	4.89e-10
NM_008047.5	Fstl1	follistatin-like 1	37,30,50	51,62,69	0.732302	0.0273312
XM_001478256.5	Gm3837	predicted gene 3837	315,401,330	536,516,484	0.732288	8.33e-06
NM_173347.2	Prune	prune exopolyphosphatase	903,942,930	1335,1396,1299	0.731063	5.18e-10
NM_001093750.1	Ptchd1	patched domain containing 1	28,31,34	50,58,39	0.731026	0.0422137
NM_010325.2	Got2	glutamatic-oxaloacetic transaminase 2, mitochondrial	3324,3169,3281	4530,5030,4598	0.73056	7.07e-13
XM_006499921.2	Samhd1	SAM domain and HD domain, 1, transcript variant X1	54,52,66	94,84,82	0.729823	0.00895417
NR_033561.1	Rbm3os	RNA binding motif protein 3, opposite strand	268,301,284	388,400,461	0.72946	3.29e-06
NM_010380.3	H2-D1	histocompatibility 2, D region locus 1	126460,140500,122180	201297,185396,174137	0.729337	9.48e-09
NM_029578.3	Tgds	TDP-glucose 4,6-dehydratase	548,571,535	864,803,739	0.728714	2.89e-07
NM_173376.3	Rbmx2	RNA binding motif protein, X-linked 2	170,145,170	241,217,254	0.728405	9.68e-05
NM_010922.2	Mrpl40	mitochondrial ribosomal protein L40	645,717,602	949,1042,875	0.727973	4.08e-07
NM_013819.2	H2-M3	histocompatibility 2, M region locus 3	1094,1189,1223	1728,1700,1643	0.727524	4.34e-10
NM_138599.5	Tomm70a	translocase of outer mitochondrial membrane 70 homolog A (yeast)	2525,2444,2537	3567,3688,3586	0.727518	7.07e-13
NM_011414.3	Slpi	secretory leukocyte peptidase inhibitor	62870,64344,55010	93721,87494,82943	0.727043	7.51e-09
NM_197980.1	Cox19	cytochrome c oxidase assembly protein 19	374,404,320	561,546,500	0.726823	8.77e-06
XR_001784310.1	Gm13248	predicted gene 13248	1114,695,1233	1300,1478,1643	0.723956	1.76e-05
NM_009748.2	Bet1	Bet1 golgi vesicular membrane trafficking protein	462,488,471	729,630,701	0.723789	4.04e-07
NM_007444.3	Amd2	S-adenosylmethionine decarboxylase 2	730,827,786	1101,1113,1177	0.723223	5.34e-09
NM_010362.3	Gsto1	glutathione S-transferase omega 1	1875,1912,1703	2755,2590,2592	0.722603	4.29e-09
NM_008415.6	Jrk	jerky	143,142,140	201,210,212	0.721227	0.00015064
NR_077226.1	Gm6297	predicted gene 6297, transcript variant 1	68,70,74	92,107,118	0.719779	0.00452247
NM_010344.4	Gsr	glutathione reductase	3676,3209,3321	4962,5073,4656	0.718544	1.54e-10
NM_012021.2	Prdx5	peroxiredoxin 5	15028,14071,12415	22331,19677,17900	0.718202	2.12e-07
NM_026061.2	Ndufb8	NADH dehydrogenase (ubiquinone) 1 beta subcomplex 8	98,123,76	157,144,143	0.717902	0.00424233
NM_026914.1	Smdt1	single-pass membrane protein with aspartate rich tail 1	2154,2339,2012	3316,3146,2912	0.716472	3.36e-08
NM_024169.3	Fkbp11	FK506 binding protein 11	26,40,38	54,62,46	0.716446	0.0412918
NM_011373.3	St6galnac4	ST6 (alpha-N-acetyl-neuraminyl-2,3-beta-galactosyl-1,3)-N-acetylgalactosaminide alpha-2,6-sialyltransferase 4, transcript variant 1	52,53,56	71,80,92	0.716422	0.0118107
NM_025550.2	Psmd6	proteasome (prosome, macropain) 26S subunit, non-ATPase, 6	2082,2178,2001	3122,2988,2891	0.716093	1.53e-09
NM_080445.4	B3galt6	UDP-Gal:betaGal beta 1,3-galactosyltransferase, polypeptide 6	214,224,244	347,327,313	0.715823	1.78e-05
NM_009399.3	Tnfrsf11a	tumor necrosis factor receptor superfamily, member 11a, NFKB activator	675,621,636	1012,940,828	0.715335	4.3e-07
NM_145615.4	Etfa	electron transferring flavoprotein, alpha polypeptide	2285,2275,1985	3122,3124,3171	0.714272	3.16e-09
NM_009687.2	Apex1	apurinic/apyrimidinic endonuclease 1	903,934,867	1262,1369,1257	0.714072	5.11e-09
NM_029103.3	Manf	mesencephalic astrocyte-derived neurotrophic factor	2977,3260,2800	4608,4345,4037	0.713165	3e-08
NR_002875.2	Gm1821	predicted gene 1821	13441,14731,12866	20213,20472,18228	0.712521	3.45e-09
NM_173180.3	Pmpca	peptidase (mitochondrial processing) alpha	411,441,449	609,655,605	0.711193	1.58e-07
NM_013843.3	Zfp53	zinc finger protein 53	53,46,57	70,65,101	0.710859	0.0187336
NM_026432.3	Saraf	store-operated calcium entry-associated regulatory factor	3106,3411,3191	4896,4583,4410	0.71056	2.03e-09
NM_019749.4	Gabarap	gamma-aminobutyric acid receptor associated protein	13078,15493,12436	20533,19769,18641	0.710451	7.21e-08
NM_026217.3	Atg12	autophagy related 12	1550,1651,1524	2272,2178,2317	0.71013	1.23e-09
XM_006510862.3	Pml	promyelocytic leukemia, transcript variant X3	271,152,310	254,388,436	0.710107	0.00255988
NR_027298.1	A230020J21Rik	RIKEN cDNA A230020J21 gene	52,50,68	79,79,96	0.708365	0.0124923
NM_153566.2	Yrdc	yrdC domain containing (E.coli)	754,801,749	1092,1167,1039	0.707702	2.86e-08
XM_006516452.2	Heatr4	HEAT repeat containing 4	245,220,247	356,317,351	0.707276	1.78e-05
NM_028753.2	Pop7	processing of precursor 7, ribonuclease P family, (S. cerevisiae)	463,481,413	638,721,596	0.707031	2.86e-06
NM_023203.1	Dctpp1	dCTP pyrophosphatase 1	249,269,273	391,381,365	0.706987	8.11e-06
NR_002688.1	Gm13363	predicted gene 13363	888,919,852	1318,1243,1238	0.705434	2.69e-08
NM_133993.3	Pwp1	PWP1 homolog, endonuclein	1186,1417,1248	1808,1906,1794	0.704629	2.4e-08
NM_144866.3	Etf1	eukaryotic translation termination factor 1	4511,4548,4548	6267,6550,6520	0.703885	9.47e-13
NM_011121.4	Plk1	polo-like kinase 1	115,114,82	121,192,149	0.703123	0.00518214
XR_878127.2	Gm39520	predicted gene, 39520	145,147,124	194,190,221	0.702282	0.000542813
NM_019393.2	Exosc9	exosome component 9	774,761,801	1130,1121,1069	0.701752	5.88e-09
NM_029632.3	Ppp1r11	protein phosphatase 1, regulatory (inhibitor) subunit 11	1165,1472,1138	1846,1891,1677	0.701471	1.92e-06
NM_172790.2	Ankrd52	ankyrin repeat domain 52	2391,1584,2754	2754,3283,3570	0.701041	1.14e-05
NM_145404.1	Prmt7	protein arginine N-methyltransferase 7	259,204,228	314,342,336	0.700964	2.84e-05
NM_016804.4	Mtx2	metaxin 2	930,945,914	1372,1264,1330	0.700447	1.33e-08
XR_867151.2	Gm29886	predicted gene, 29886, transcript variant X2	46,44,53	78,83,54	0.699988	0.0260468
NM_025859.3	Arl1	ADP-ribosylation factor-like 1	1737,1542,1652	2319,2345,2325	0.699413	1.51e-10
NM_009536.4	Ywhae	tyrosine 3-monooxygenase/tryptophan 5-monooxygenase activation protein, epsilon polypeptide	8903,9680,9059	13282,13064,12964	0.699129	7.15e-11
XR_001779565.1	LOC108167748	uncharacterized LOC108167748	104,96,87	153,145,121	0.697404	0.00349962
NM_025689.4	Ccdc51	coiled-coil domain containing 51	199,286,226	351,335,339	0.696646	0.00020978
NM_010685.4	Lamp2	lysosomal-associated membrane protein 2, transcript variant 2	8574,8501,8491	12628,11177,12423	0.696157	2.56e-10
NM_001163064.1	AU041133	expressed sequence AU041133	107,110,129	145,168,188	0.695396	0.00107387
NM_001271005.1	H2-T-ps	histocompatibility 2, T region locus, pseudogene	3150,2682,2441	4154,3909,3691	0.695144	3.68e-07
NM_001083918.1	Gm13139	predicted gene 13139	2528,1892,2537	3206,3040,3589	0.694507	7.35e-08
NM_025740.3	Cfap36	cilia and flagella associated protein 36	97,78,86	135,128,117	0.694486	0.00393332
NM_025670.4	Cdip1	cell death inducing Trp53 target 1	804,930,752	1288,1196,1059	0.694143	5.33e-06
NM_001171002.1	Degs2	delta(4)-desaturase, sphingolipid 2, transcript variant 2	1369,1472,1358	2037,1934,1970	0.692844	7.98e-09
NM_026932.4	Ebna1bp2	EBNA1 binding protein 2	1273,1381,1279	1904,1938,1725	0.692556	2.45e-08
NM_001142441.1	Sap18b	Sin3-associated polypeptide 18B	810,863,739	1217,1176,1034	0.69255	1.37e-06
XM_011250673.2	Timm50	translocase of inner mitochondrial membrane 50, transcript variant X1	63,62,50	90,97,73	0.691923	0.0169514
NM_025596.5	Prelid1	PRELI domain containing 1	4953,5499,4572	7202,7522,6585	0.691693	6.36e-08
NM_016679.4	Keap1	kelch-like ECH-associated protein 1, transcript variant 1	59,44,71	68,97,93	0.69112	0.0179535
NM_007502.4	Atp1b3	ATPase, Na+/K+ transporting, beta 3 polypeptide	1523,1167,1152	1881,1657,1920	0.690568	2.32e-06
NM_024166.6	Chchd2	coiled-coil-helix-coiled-coil-helix domain containing 2	4413,5157,3888	6736,6500,5900	0.690243	1.67e-06
NM_016792.4	Txnl1	thioredoxin-like 1	1932,2096,1917	2954,2891,2555	0.69023	4.51e-08
NM_028762.1	Rbm19	RNA binding motif protein 19	779,775,878	1136,1162,1127	0.689871	4.21e-09
NM_007590.3	Calm3	calmodulin 3	4076,4396,4031	6132,5969,5538	0.689734	4.58e-09
NM_025305.2	Mrps7	mitchondrial ribosomal protein S7	1100,1118,938	1546,1541,1388	0.68942	6.38e-07
NM_001081181.2	9430016H08Rik	RIKEN cDNA 9430016H08 gene	364,379,341	530,516,493	0.689247	5.06e-06
NM_013895.4	Timm13	translocase of inner mitochondrial membrane 13	1304,1682,1324	2156,2191,1788	0.689035	7.33e-06
NM_025898.3	Napa	N-ethylmaleimide sensitive fusion protein attachment protein alpha	413,476,349	606,584,576	0.687174	3.86e-05
NM_010579.2	Eif6	eukaryotic translation initiation factor 6	2554,2903,2318	3834,3815,3354	0.686681	7.38e-07
NM_010049.3	Dhfr	dihydrofolate reductase	164,152,160	223,259,198	0.68454	0.000442081
NM_026472.4	Nifk	nucleolar protein interacting with the FHA domain of MKI67	1047,1077,1056	1480,1531,1458	0.68436	3.15e-09
NM_181732.4	Aida	axin interactor, dorsalization associated	1868,1854,2084	2668,2735,2724	0.684255	3.32e-11
NM_025509.3	Ostc	oligosaccharyltransferase complex subunit (non-catalytic)	1527,1645,1464	2286,2171,2071	0.683718	6.28e-08
NM_011655.5	Tubb5	tubulin, beta 5 class I	17392,17837,17209	23967,25841,23905	0.683602	1.48e-11
NM_007983.2	Faf1	Fas-associated factor 1	1312,1377,1308	1870,1887,1857	0.683384	2.53e-09
NM_011614.3	Tnfsf12	tumor necrosis factor (ligand) superfamily, member 12	1262,1586,1266	1948,2032,1838	0.683088	1.27e-06
NM_011801.1	Cfdp1	craniofacial development protein 1	1535,1833,1590	2418,2259,2306	0.682865	1.39e-07
NM_007834.3	Dscr3	Down syndrome critical region gene 3	3289,3216,3042	4395,4377,4627	0.682519	3.71e-10
NM_024197.1	Ndufa10	NADH dehydrogenase (ubiquinone) 1 alpha subcomplex 10	2088,2171,1943	2957,2943,2815	0.68193	1.05e-08
NM_134188.3	Acot2	acyl-CoA thioesterase 2	396,388,392	545,566,545	0.681772	8.32e-07
NM_019824.4	Arpc3	actin related protein 2/3 complex, subunit 3	10038,10567,9440	14711,14221,13283	0.681604	8.32e-09
NM_198303.2	Eif5b	eukaryotic translation initiation factor 5B	4560,5007,4685	6331,6228,7451	0.680367	4.36e-09
NM_021550.3	C1galt1c1	C1GALT1-specific chaperone 1	640,758,654	996,880,1016	0.679968	2.45e-06
NM_030250.2	Nus1	NUS1 dehydrodolichyl diphosphate synthase subunit	5574,5008,5188	7530,7432,7078	0.679861	3.5e-10
XR_387206.3	LOC102634459	uncharacterized LOC102634459	1493,1564,1707	2068,2286,2308	0.679623	1.64e-10
NM_011032.2	P4hb	prolyl 4-hydroxylase, beta polypeptide	23093,22531,21715	30844,32460,30883	0.679489	2.92e-11
NM_013558.2	Hspa1l	heat shock protein 1-like	79,99,68	103,149,109	0.678903	0.0116302
NM_025559.2	Mien1	migration and invasion enhancer 1	1181,1464,1179	1866,1889,1634	0.678338	3.07e-06
NM_020582.2	Atp5j2	ATP synthase, H+ transporting, mitochondrial F0 complex, subunit F2	2084,2362,1870	3080,3006,2804	0.678199	8.28e-07
NM_026490.2	Mrpl19	mitochondrial ribosomal protein L19	736,744,650	1066,945,979	0.677425	1.96e-06
NM_001302956.1	Qsox2	quiescin Q6 sulfhydryl oxidase 2, transcript variant 1	240,246,246	333,353,346	0.677026	1.98e-05
NM_001085440.1	Smcr8	Smith-Magenis syndrome chromosome region, candidate 8 homolog (human), transcript variant 1	2837,2422,3037	3678,3901,3973	0.676514	1.87e-10
NM_175331.3	Nt5dc3	5'-nucleotidase domain containing 3	531,528,575	714,801,772	0.676402	6.58e-08
NM_026938.1	Tmem160	transmembrane protein 160	1087,1121,832	1526,1547,1231	0.676385	4.14e-05
XR_872527.1	Bnip3l-ps	BCL2/adenovirus E1B interacting protein 3-like, pseudogene	853,744,838	1115,1037,1252	0.67547	1.38e-07
NM_008683.3	Nedd8	neural precursor cell expressed, developmentally down-regulated gene 8	2270,2806,2182	3547,3519,3142	0.675292	2.5e-06
NM_198606.2	Dcaf13	DDB1 and CUL4 associated factor 13	1131,1260,1093	1736,1608,1536	0.67462	5.74e-07
XR_001778792.1	A530040E14Rik	RIKEN cDNA A530040E14 gene	1169,1346,1392	1801,1866,1773	0.673754	1.43e-08
NM_025628.2	Cox6b1	cytochrome c oxidase, subunit VIb polypeptide 1	3314,3857,3217	4955,5119,4470	0.673571	2.71e-07
NM_001013379.2	Zfp930	zinc finger protein 930	285,307,314	426,413,431	0.6727	8.64e-06
NM_007534.3	Bcl2a1b	B cell leukemia/lymphoma 2 related protein A1b	3131,4036,3280	5154,4628,4860	0.672572	1.44e-06
NM_001024206.2	Trappc1	trafficking protein particle complex 1	1144,1346,1084	1654,1696,1652	0.669881	7.91e-07
NM_001033273.2	5031439G07Rik	RIKEN cDNA 5031439G07 gene	8376,7210,8593	10994,11398,11084	0.669609	3.09e-11
NM_001167784.1	Tcirg1	T cell, immune regulator 1, ATPase, H+ transporting, lysosomal V0 protein A3, transcript variant 3	113,57,129	132,151,147	0.669127	0.0134427
NM_001111304.1	Tbc1d9	TBC1 domain family, member 9, transcript variant 1	236,157,239	248,279,368	0.669103	0.00113176
NM_013542.2	Gzmb	granzyme B	120,152,127	193,227,150	0.667741	0.00381105
XM_011240905.2	Ift22	intraflagellar transport 22, transcript variant X1	90,95,96	155,115,131	0.667305	0.00609692
NM_008214.4	Hars	histidyl-tRNA synthetase	1512,1608,1501	2121,2208,2086	0.666048	7.77e-09
NM_009275.4	Srprb	signal recognition particle receptor, B subunit	1241,1342,1282	1721,1959,1687	0.665417	3.45e-08
NM_019788.3	Bloc1s6	biogenesis of lysosomal organelles complex-1, subunit 6, pallidin	1632,1602,1564	2172,2221,2258	0.665241	1.28e-09
NM_175478.2	Lrfn3	leucine rich repeat and fibronectin type III domain containing 3	192,189,188	284,257,257	0.665227	0.0002227
NM_028632.2	Fcf1	FCF1 rRNA processing protein	711,902,738	1087,1138,1057	0.663988	4.39e-06
NM_011400.3	Slc2a1	solute carrier family 2 (facilitated glucose transporter), member 1	78,62,72	94,126,86	0.663906	0.0148481
NM_134040.1	Ddx1	DEAD (Asp-Glu-Ala-Asp) box polypeptide 1	2175,2121,2190	2885,3063,3011	0.66304	7.75e-11
NM_011779.3	Coro1c	coronin, actin binding protein 1C	10466,10728,10961	14654,15055,14638	0.662375	1.05e-11
NM_026559.3	Txndc17	thioredoxin domain containing 17	2661,2984,2474	3992,3692,3589	0.662273	6.35e-07
NM_030259.1	Rilpl2	Rab interacting lysosomal protein-like 2	7285,8045,7350	10756,10608,10074	0.662198	5.55e-09
NM_011185.3	Psmb1	proteasome (prosome, macropain) subunit, beta type 1	3744,4465,3499	5575,5581,5148	0.662109	1.22e-06
NM_026030.2	Eif2s2	eukaryotic translation initiation factor 2, subunit 2 (beta)	2546,2741,2511	3646,3638,3509	0.661907	7.99e-09
NM_025381.2	Atp6v1f	ATPase, H+ transporting, lysosomal V1 subunit F	3540,3952,3278	5215,5270,4475	0.661434	1.03e-06
NM_027430.2	Mpc2	mitochondrial pyruvate carrier 2	896,1088,835	1427,1305,1197	0.659886	2.59e-05
NM_012030.2	Slc9a3r1	solute carrier family 9 (sodium/hydrogen exchanger), member 3 regulator 1	3140,3300,2981	4440,4375,4176	0.656101	2.05e-08
NM_013566.2	Itgb7	integrin beta 7	139,229,177	269,273,228	0.656085	0.00297045
NM_007991.3	Fbl	fibrillarin	2386,2675,2325	3323,3696,3189	0.655852	1.47e-07
NM_144874.4	Cox15	cytochrome c oxidase assembly protein 15	1270,1077,1242	1608,1692,1632	0.654785	1.01e-08
NM_133719.2	Metrn	meteorin, glial cell differentiation regulator	296,359,322	480,466,411	0.654782	7.75e-05
NM_028260.2	Immp1l	IMP1 inner mitochondrial membrane peptidase-like (S. cerevisiae)	357,449,364	569,535,522	0.653702	6.57e-05
NM_025843.3	Ndufb7	NADH dehydrogenase (ubiquinone) 1 beta subcomplex, 7	1742,2062,1556	2614,2597,2226	0.653544	1.55e-05
NM_183358.4	Gadd45gip1	growth arrest and DNA-damage-inducible, gamma interacting protein 1	639,798,624	985,1008,869	0.653473	2.95e-05
NM_001024919.1	Bod1	biorientation of chromosomes in cell division 1	434,479,397	573,654,592	0.653437	1.48e-05
NM_010385.2	Pfdn6	prefoldin subunit 6, transcript variant 1	102,116,93	149,153,138	0.653344	0.00461033
NR_037190.1	Gm9855	predicted pseudogene 9855	866,915,911	1205,1295,1204	0.653195	3.5e-08
NM_026095.4	Snrpd3	small nuclear ribonucleoprotein D3	1280,1321,1184	1704,1878,1640	0.653167	2.01e-07
NM_133800.3	Nol12	nucleolar protein 12	78,85,90	122,125,111	0.653141	0.00701489
NM_134078.4	Chmp7	charged multivesicular body protein 7	1965,2028,1974	2741,2840,2615	0.652643	5.13e-09
XM_011247898.2	Sp110	Sp110 nuclear body protein, transcript variant X2	293,402,288	482,452,439	0.651691	0.000415861
NM_024240.6	Gins4	GINS complex subunit 4 (Sld5 homolog)	603,644,632	881,857,846	0.65105	4.93e-07
NM_026000.2	Psmd9	proteasome (prosome, macropain) 26S subunit, non-ATPase, 9	627,676,569	871,861,853	0.65102	3.8e-06
NM_019641.4	Stmn1	stathmin 1	357,401,346	478,552,499	0.649819	2.15e-05
NM_025542.2	Rtfdc1	replication termination factor 2 domain containing 1	3799,4084,3795	5336,5478,5219	0.64966	3.44e-09
NM_026775.4	Tmed10	transmembrane emp24-like trafficking protein 10 (yeast)	9532,8816,9065	12700,12609,12301	0.649523	2.1e-10
NM_178878.2	Hadha	hydroxyacyl-Coenzyme A dehydrogenase/3-ketoacyl-Coenzyme A thiolase/enoyl-Coenzyme A hydratase (trifunctional protein), alpha subunit	4710,4669,4583	6169,6547,6381	0.648255	1.55e-10
NM_133777.2	Ube2s	ubiquitin-conjugating enzyme E2S	1482,1702,1414	2159,2244,1930	0.647932	2.27e-06
NM_026374.3	Ilf2	interleukin enhancer binding factor 2	898,936,810	1239,1265,1132	0.646785	2e-06
NM_027236.2	Eif1ad	eukaryotic translation initiation factor 1A domain containing	951,953,888	1243,1364,1225	0.646729	2.02e-07
NM_177366.3	Gpr157	G protein-coupled receptor 157	301,310,372	406,472,474	0.645686	1.78e-05
NM_026001.2	Rnaseh2b	ribonuclease H2, subunit B	478,569,455	738,659,676	0.645676	4.69e-05
NM_010749.6	M6pr	mannose-6-phosphate receptor, cation dependent	9486,9182,9547	12793,12867,12798	0.645598	3.17e-11
NM_026615.4	Urm1	ubiquitin related modifier 1	905,1086,865	1329,1349,1254	0.644569	6.99e-06
NM_008889.2	Ppp1r14b	protein phosphatase 1, regulatory (inhibitor) subunit 14B	2291,2419,1893	3091,3263,2739	0.644196	7.98e-06
NR_015618.2	A930015D03Rik	RIKEN cDNA A930015D03 gene	268,318,294	400,426,387	0.643921	6.13e-05
NM_019437.3	Rfk	riboflavin kinase	2452,2549,2461	3371,3464,3351	0.6436	2.21e-09
NM_011530.3	Tap2	transporter 2, ATP-binding cassette, sub-family B (MDR/TAP)	3343,3902,3801	5426,4986,4645	0.641912	3.96e-07
NM_178614.4	Samm50	SAMM50 sorting and assembly machinery component	2684,2926,2694	3891,3830,3609	0.641619	4.73e-08
NM_198607.1	Them6	thioesterase superfamily member 6	449,572,527	741,728,656	0.641519	2.67e-05
NM_013897.2	Timm8b	translocase of inner mitochondrial membrane 8B	692,806,634	1066,1006,860	0.640913	6.89e-05
NM_008302.3	Hsp90ab1	heat shock protein 90 alpha (cytosolic), class B member 1	38267,38891,38611	51823,54774,52039	0.640069	2.58e-11
NM_008928.4	Map2k3	mitogen-activated protein kinase kinase 3	134,122,119	177,176,168	0.639673	0.00223265
NM_145431.2	Nle1	notchless homolog 1 (Drosophila)	55,66,64	94,93,76	0.639635	0.0236438
NR_033513.1	Gm6793	predicted gene 6793	2689,2914,2794	3700,4025,3709	0.638798	4.78e-09
NM_001136085.2	Uba1	ubiquitin-like modifier activating enzyme 1, transcript variant 2	108,85,143	152,178,138	0.63856	0.00772705
NM_199199.3	Tmem199	transmembrane protein 199	600,710,601	865,865,886	0.638025	5.78e-06
NM_007754.2	Cpd	carboxypeptidase D	4171,3203,4121	4773,5321,5540	0.637102	4.87e-08
NM_026195.3	Atic	5-aminoimidazole-4-carboxamide ribonucleotide formyltransferase/IMP cyclohydrolase	1889,1704,1860	2441,2520,2433	0.636907	2.6e-09
XM_011241886.2	Pdzd9	PDZ domain containing 9, transcript variant X1	199,240,185	301,271,291	0.636905	0.000878008
NR_073374.1	4930506C21Rik	RIKEN cDNA 4930506C21 gene	179,197,150	256,246,227	0.636109	0.001633
XM_011248832.1	Ccl4	chemokine (C-C motif) ligand 4, transcript variant X1	205,252,206	306,314,293	0.634036	0.000487597
NM_017393.2	Clpp	caseinolytic mitochondrial matrix peptidase proteolytic subunit	641,766,612	900,987,876	0.633652	1.93e-05
NM_172499.2	Mfsd9	major facilitator superfamily domain containing 9	238,189,194	293,244,318	0.633592	0.00103755
NM_172578.2	Mis18bp1	MIS18 binding protein 1	110,95,121	134,165,153	0.632831	0.00413496
NM_133933.4	Rpn1	ribophorin I	7630,7568,7378	10211,10144,10195	0.632466	8.52e-10
NM_022997.4	Vps35	VPS35 retromer complex component	6713,6028,6514	8425,8625,8971	0.632162	1.51e-10
NM_026572.3	Gcsh	glycine cleavage system protein H (aminomethyl carrier)	830,802,659	1096,1085,947	0.631668	3.64e-05
NM_008996.3	Rab1a	RAB1A, member RAS oncogene family	7567,7708,7729	10511,10267,10297	0.631617	6.11e-10
NM_029963.2	Mrps5	mitochondrial ribosomal protein S5	691,685,674	930,947,903	0.631176	5.4e-07
NM_024273.2	Timmdc1	translocase of inner mitochondrial membrane domain containing 1	260,299,280	414,421,314	0.630878	0.000541424
NM_010886.2	Ndufa4	NADH dehydrogenase (ubiquinone) 1 alpha subcomplex, 4	2600,2954,2438	3797,3666,3421	0.629336	1.9e-06
NM_027439.4	Atp6ap2	ATPase, H+ transporting, lysosomal accessory protein 2	5401,5575,5352	7293,7246,7544	0.628026	1.44e-09
NR_002889.2	Gm5801	predicted pseudogene 5801	192,227,158	263,276,258	0.627891	0.00190651
NM_019785.2	Actr10	ARP10 actin-related protein 10	1538,1804,1498	2221,2253,2089	0.627201	2.53e-06
NM_027193.2	Dph5	diphthamide biosynthesis 5	157,163,132	202,242,181	0.627198	0.00332146
NM_177282.5	Mical2	microtubule associated monooxygenase, calponin and LIM domain containing 2, transcript variant B	82,83,79	127,112,101	0.626897	0.0141692
NM_017472.4	Snx3	sorting nexin 3	5418,6197,5334	7951,7753,7217	0.626223	5.7e-07
NM_027244.1	Ndufa11	NADH dehydrogenase (ubiquinone) 1 alpha subcomplex 11	850,1130,815	1372,1331,1115	0.626155	0.000245578
NM_011342.4	Sec22b	SEC22 homolog B, vesicle trafficking protein	1438,1443,1475	1922,2010,1937	0.62598	7.67e-09
NM_010833.2	Msn	moesin	29402,25089,30786	35622,38684,40835	0.625911	4.1e-10
XM_006521671.3	Nsun3	NOL1/NOP2/Sun domain family member 3, transcript variant X1	259,263,292	377,366,361	0.625837	7.33e-05
NM_145371.4	Eif2b1	eukaryotic translation initiation factor 2B, subunit 1 (alpha)	131,116,129	155,175,187	0.624775	0.00254354
NM_145538.2	Tmem189	transmembrane protein 189	7441,7132,6963	9468,10180,9355	0.624258	3.22e-09
NM_019781.2	Pex14	peroxisomal biogenesis factor 14	845,874,718	1157,1164,986	0.623787	3.42e-05
NM_009251.1	Serpina3g	serine (or cysteine) peptidase inhibitor, clade A, member 3G	313,475,502	690,609,461	0.623448	0.00270084
NM_173397.4	Fitm2	fat storage-inducing transmembrane protein 2	133,81,121	154,154,154	0.623306	0.00842876
NM_174989.4	Ticam1	toll-like receptor adaptor molecule 1	1399,1389,1414	1750,2032,1869	0.62095	2.02e-08
NM_009443.3	Tgoln1	trans-golgi network protein	7821,7093,8322	9852,10573,10658	0.619535	9.5e-11
NM_001173500.2	Mfsd4b3	major facilitator superfamily domain containing 4B3	108,114,95	143,149,145	0.618436	0.00653111
NM_138587.4	Fam3c	family with sequence similarity 3, member C	44,43,55	60,74,67	0.61764	0.046803
NM_011461.3	Spic	Spi-C transcription factor (Spi-1/PU.1 related)	303,229,181	337,346,295	0.61675	0.00382077
XR_001784270.1	Gm12404	predicted gene 12404	92,82,71	101,131,109	0.616279	0.0170134
NR_030711.1	Mir22hg	Mir22 host gene (non-protein coding)	1288,1249,1121	1664,1680,1566	0.61601	1.77e-06
NM_172269.3	Vps18	VPS18 CORVET/HOPS core subunit	3219,3264,3298	4355,4509,4212	0.61588	4.38e-09
NM_011626.2	Tmem165	transmembrane protein 165	3605,3340,3193	4638,4492,4461	0.615815	9.25e-08
NM_013863.5	Bag3	BCL2-associated athanogene 3	1294,1286,1281	1733,1843,1598	0.615181	2.84e-07
XR_386288.3	Gm6978	predicted gene 6978	118,143,133	195,171,172	0.615067	0.00423128
NM_020050.1	Tmem9b	TMEM9 domain family, member B	2145,2388,2018	3042,3015,2744	0.614509	2.73e-06
XM_017313632.1	LOC102638435	nuclear body protein SP140-like protein, transcript variant X1	470,610,493	690,751,686	0.614218	8.11e-05
NR_024619.1	2610001J05Rik	RIKEN cDNA 2610001J05 gene	1625,1766,1512	2224,2213,2144	0.613905	1.27e-06
NM_029092.3	Trmt10c	tRNA methyltransferase 10C	559,679,634	845,805,861	0.613171	1.2e-05
NM_133916.2	Eif3b	eukaryotic translation initiation factor 3, subunit B	5246,5553,5161	6946,7527,6908	0.612963	1.76e-08
NM_198001.2	1110008P14Rik	RIKEN cDNA 1110008P14 gene	528,623,454	725,763,685	0.612757	0.000200201
NM_177041.3	Flad1	flavin adenine dinucleotide synthetase 1	945,1023,986	1394,1323,1231	0.611273	2.44e-06
NM_025536.2	Commd5	COMM domain containing 5	531,686,558	852,785,751	0.611108	0.0001327
NM_001204875.1	Set	SET nuclear oncogene, transcript variant 2	440,320,346	472,571,450	0.610823	0.000413497
XR_001779586.1	LOC108167751	uncharacterized LOC108167751	239,158,212	247,258,321	0.610464	0.0022474
XR_001779123.1	LOC108167643	protein transport protein Sec61 subunit gamma pseudogene	225,260,201	314,337,280	0.610063	0.00130984
NM_011409.1	Slfn3	schlafen 3	90,65,127	105,143,141	0.609923	0.0227669
NM_011499.3	Strap	serine/threonine kinase receptor associated protein	2653,2905,2655	3762,3717,3482	0.609478	3.05e-07
NM_025440.2	Mrps16	mitochondrial ribosomal protein S16	749,865,729	1016,1175,957	0.609002	2.93e-05
XM_011238736.2	Mndal	myeloid nuclear differentiation antigen like, transcript variant X5	239,187,345	327,315,397	0.607842	0.00327067
NM_145614.4	Dlat	dihydrolipoamide S-acetyltransferase (E2 component of pyruvate dehydrogenase complex)	1423,1297,1389	1853,1881,1731	0.607772	1.55e-07
NR_132443.1	Hist1h2al	histone cluster 1, H2al	184,244,208	320,321,223	0.607693	0.00462306
NR_003634.2	Rps4l	ribosomal protein S4-like	330,385,323	474,503,419	0.606134	0.00028225
NM_001081236.1	2410131K14Rik	RIKEN cDNA 2410131K14 gene	362,330,404	444,525,495	0.605821	3.13e-05
NM_001001881.2	2510009E07Rik	RIKEN cDNA 2510009E07 gene	2018,1611,1869	2251,2434,2628	0.605729	3.08e-07
NM_025882.3	Pole4	polymerase (DNA-directed), epsilon 4 (p12 subunit)	632,748,580	897,869,864	0.6054	7.35e-05
NM_026172.3	Decr1	2,4-dienoyl CoA reductase 1, mitochondrial	781,787,763	1046,1064,993	0.604751	1.62e-06
NM_013497.3	Creb3	cAMP responsive element binding protein 3	1740,1890,1660	2378,2474,2200	0.604665	1.78e-06
NM_009761.3	Bnip3l	BCL2/adenovirus E1B interacting protein 3-like	175,150,219	230,257,244	0.604524	0.00153844
XM_006531777.1	Mrpl21	mitochondrial ribosomal protein L21, transcript variant X1	58,77,70	101,104,79	0.604109	0.032523
NM_147778.3	Commd3	COMM domain containing 3	1877,2154,1755	2685,2517,2512	0.604004	9.22e-06
NM_175399.4	Exosc4	exosome component 4	602,772,623	913,910,851	0.603122	8.11e-05
NM_026318.3	Hypk	huntingtin interacting protein K	1126,1419,1144	1747,1697,1488	0.603007	6.26e-05
NM_133783.2	Ptges2	prostaglandin E synthase 2	554,507,423	690,656,642	0.602717	0.000163927
NM_029083.2	Ddit4	DNA-damage-inducible transcript 4	495,508,544	621,779,661	0.601627	1.33e-05
NM_008175.4	Grn	granulin	101698,118397,104705	150038,145057,136048	0.601103	7.92e-07
NM_011018.3	Sqstm1	sequestosome 1, transcript variant 1	149,146,146	198,212,184	0.600388	0.00252823
NM_178644.3	Oaf	out at first homolog	155,139,127	203,210,157	0.599496	0.00690077
NM_001165971.1	Gm5803	predicted gene 5803	79,65,64	102,91,93	0.598902	0.028331
NM_012002.3	Cops6	COP9 signalosome subunit 6	1964,2263,1818	2708,2690,2645	0.598328	7.92e-06
XR_868019.2	LOC105244657	heterogeneous nuclear ribonucleoprotein A3 pseudogene	1920,1902,2014	2434,2638,2634	0.597861	4.97e-09
NM_024198.3	Gpx7	glutathione peroxidase 7	128,156,116	200,186,157	0.597318	0.00979828
NM_025593.1	Polr2l	polymerase (RNA) II (DNA directed) polypeptide L	543,703,531	825,833,717	0.596563	0.000362746
NM_175163.3	Zfp689	zinc finger protein 689	133,125,114	157,184,162	0.596422	0.0056106
XR_880074.1	LOC102635048	60S ribosomal protein L12 pseudogene	387,473,422	522,637,551	0.595804	0.000116098
NR_040355.1	Znf41-ps	ZNF41, pseudogene	2645,2167,2617	3261,3095,3427	0.595084	2.69e-07
NM_025895.4	Med28	mediator complex subunit 28	2035,2266,1889	2908,2807,2491	0.59458	1.74e-05
NM_025790.2	Acot13	acyl-CoA thioesterase 13	836,1023,790	1197,1171,1158	0.59455	6.91e-05
XM_006533414.3	Lsm12	LSM12 homolog, transcript variant X1	458,525,434	671,617,596	0.59362	0.000174691
NM_176928.1	Brwd1	bromodomain and WD repeat domain containing 1, transcript variant 3	148,145,150	200,186,207	0.593002	0.0026719
NR_015519.1	AI662270	expressed sequence AI662270	2554,2980,2587	3613,3507,3610	0.592865	1.67e-06
XR_865593.2	LOC105243968	uncharacterized LOC105243968	208,230,139	263,255,264	0.591508	0.00811034
NM_025904.3	Yae1d1	Yae1 domain containing 1	348,355,342	437,484,464	0.591217	5.95e-05
NM_021498.2	Pole3	polymerase (DNA directed), epsilon 3 (p17 subunit)	367,375,386	523,528,440	0.589708	0.000150153
NR_104577.1	0610040F04Rik	RIKEN cDNA 0610040F04 gene, transcript variant 1	52,57,82	69,101,93	0.589399	0.046219
NM_026403.3	Nop9	NOP9 nucleolar protein	1282,1279,1223	1648,1684,1647	0.589344	4.22e-07
NM_026126.4	Fundc2	FUN14 domain containing 2	1356,1576,1346	1918,1850,1876	0.588684	6.74e-06
NM_025899.2	Uqcrc2	ubiquinol cytochrome c reductase core protein 2	3267,3271,3212	4237,4344,4213	0.588238	2.41e-08
NM_011193.2	Pstpip1	proline-serine-threonine phosphatase-interacting protein 1	83,69,82	112,109,96	0.588145	0.0231973
NM_026246.3	Mrpl49	mitochondrial ribosomal protein L49	806,945,852	1140,1222,1069	0.586755	1.54e-05
NM_027799.2	Ankrd40	ankyrin repeat domain 40, transcript variant 1	1444,1624,1412	1957,2009,1931	0.586188	2.96e-06
NM_025410.2	Lage3	L antigen family, member 3	410,488,403	553,607,562	0.585241	0.000156535
NR_002928.2	Gm1943	predicted gene 1943	56,69,58	87,88,76	0.585112	0.0435558
NM_008197.3	H1f0	H1 histone family, member 0	2091,2037,2197	2961,2730,2576	0.584503	9.08e-07
NM_024219.1	Hsbp1	heat shock factor binding protein 1	3172,3412,2942	4352,4258,3893	0.584127	5.33e-06
XR_001779957.1	Adap2	ArfGAP with dual PH domains 2, transcript variant X1	154,66,180	148,200,196	0.583988	0.0436893
XR_141398.5	Gm14719	predicted gene 14719	97,137,109	158,164,140	0.582724	0.0146535
NM_008967.3	Ptgir	prostaglandin I receptor (IP)	137,118,155	176,171,198	0.582132	0.00508372
NM_016772.1	Ech1	enoyl coenzyme A hydratase 1, peroxisomal	2475,2886,2562	3545,3623,3227	0.581294	4.4e-06
NM_007421.2	Adssl1	adenylosuccinate synthetase like 1	2775,3267,3009	4148,4038,3659	0.580802	4.97e-06
NM_009742.3	Bcl2a1a	B cell leukemia/lymphoma 2 related protein A1a	1316,1584,1375	1913,1845,1849	0.580658	1.07e-05
NM_026435.5	Ufm1	ubiquitin-fold modifier 1	1618,1717,1546	2165,2124,2096	0.580516	1.91e-06
NM_001164604.1	Nsmce2	NSE2/MMS21 homolog, SMC5-SMC6 complex SUMO ligase, transcript variant 2	78,68,80	101,112,92	0.579985	0.0268782
NM_007830.4	Dbi	diazepam binding inhibitor, transcript variant 2	77,95,79	120,114,105	0.579912	0.0245967
NM_025848.3	Sdhd	succinate dehydrogenase complex, subunit D, integral membrane protein	3608,3802,3339	4798,4747,4573	0.579459	1.12e-06
NM_030561.3	BC004004	cDNA sequence BC004004	95,99,84	139,112,123	0.578867	0.021051
NR_002885.3	Gm10052	predicted pseudogene 10052	1482,1415,1535	1872,2000,1900	0.578503	7.22e-08
NM_023403.3	Mesdc2	mesoderm development candidate 2	1958,2222,2092	2723,2760,2705	0.57839	6.04e-07
NM_025901.3	Polr3k	polymerase (RNA) III (DNA directed) polypeptide K	712,709,707	941,882,955	0.577467	6.49e-06
NR_045146.1	BC051226	cDNA sequence BC051226	87,102,124	153,119,146	0.577291	0.0186884
NM_033521.3	Laptm4b	lysosomal-associated protein transmembrane 4B	664,794,703	951,953,924	0.575902	3.22e-05
NM_026737.3	Phf5a	PHD finger protein 5A	882,1026,828	1259,1178,1148	0.57516	8.92e-05
NM_199008.2	Cox11	cytochrome c oxidase assembly protein 11	278,278,275	413,341,336	0.574518	0.00112432
NR_027956.1	1700052K11Rik	RIKEN cDNA 1700052K11 gene	184,206,169	255,235,249	0.573857	0.00315109
NM_009321.2	Tbca	tubulin cofactor A	2196,2595,2223	3263,3027,2862	0.573506	2.32e-05
NR_040446.1	C920021L13Rik	RIKEN cDNA C920021L13 gene	279,268,267	386,344,336	0.572826	0.000712982
NM_133354.2	Sumo2	small ubiquitin-like modifier 2	3719,4263,3755	5295,4966,5022	0.57261	3.5e-06
NM_010658.3	Mafb	v-maf musculoaponeurotic fibrosarcoma oncogene family, protein B (avian)	13247,11031,11826	16266,15177,15401	0.571431	7.8e-07
NM_172757.3	Heatr3	HEAT repeat containing 3	949,888,929	1164,1249,1179	0.571405	1.15e-06
NM_008228.2	Hdac1	histone deacetylase 1	1680,1761,1732	2147,2442,2123	0.569258	8.66e-07
NM_019411.4	Ppp2ca	protein phosphatase 2 (formerly 2A), catalytic subunit, alpha isoform	4840,4971,4676	6292,6310,6192	0.568875	1.61e-07
NM_024221.3	Pdhb	pyruvate dehydrogenase (lipoamide) beta	2093,2238,2013	2780,2805,2647	0.567983	2.37e-06
NR_130345.1	Gm15326	predicted gene 15326	70,54,68	68,97,95	0.567527	0.049173
XR_878599.2	Gm15453	predicted gene 15453	1800,2388,1763	2783,2459,2529	0.566955	0.00035115
NM_027212.2	Med30	mediator complex subunit 30	406,468,375	554,559,520	0.566924	0.000439449
NM_019537.2	Psmg1	proteasome (prosome, macropain) assembly chaperone 1	451,478,410	594,557,594	0.566753	0.00019597
NM_024184.2	Asf1b	anti-silencing function 1B histone chaperone	216,215,204	262,274,295	0.565243	0.00126426
XR_385459.3	LOC102633627	tropomyosin alpha-4 chain pseudogene	145,136,125	188,203,146	0.565209	0.012654
NM_026553.4	Yif1a	Yip1 interacting factor homolog A (S. cerevisiae)	979,955,838	1190,1255,1155	0.564821	2.76e-05
NM_007604.2	Capza2	capping protein (actin filament) muscle Z-line, alpha 2	8503,8141,7999	10893,10158,10800	0.562948	2.17e-07
NM_001160319.1	Ubr4	ubiquitin protein ligase E3 component n-recognin 4	7911,6208,9028	8713,10343,10799	0.562314	1.23e-05
NM_009503.4	Vcp	valosin containing protein	10959,11014,10896	13422,14712,14068	0.561917	1.82e-08
NM_009682.3	Ap3s2	adaptor-related protein complex 3, sigma 2 subunit	1414,1283,1482	1822,1836,1716	0.561574	1.06e-06
NM_019657.4	Hsd17b12	hydroxysteroid (17-beta) dehydrogenase 12	2830,2784,2759	3519,3793,3477	0.561443	1.94e-07
NM_025507.2	Snw1	SNW domain containing 1	2788,3162,3050	3979,3732,3888	0.561433	1.52e-06
NM_026753.2	Fam96b	family with sequence similarity 96, member B	683,804,685	937,1055,830	0.56093	0.000238898
XM_006512856.3	Mcm9	minichromosome maintenance 9 homologous recombination repair factor, transcript variant X5	68,82,64	100,92,95	0.560534	0.0429799
XM_006495774.1	Slc11a1	solute carrier family 11 (proton-coupled divalent metal ion transporters), member 1, transcript variant X2	64,55,71	87,86,81	0.559948	0.0479199
NM_024200.4	Mfn1	mitofusin 1	102,94,89	132,126,119	0.559474	0.0209948
NM_027231.2	Polr2f	polymerase (RNA) II (DNA directed) polypeptide F	757,915,758	1107,1103,941	0.559371	0.000256843
NM_015827.2	Copb2	coatomer protein complex, subunit beta 2 (beta prime)	4743,4629,4829	5994,6153,6083	0.558769	1.54e-08
XM_003945557.2	Gm15776	predicted gene 15776	551,697,490	800,741,726	0.558626	0.00136444
NM_025433.3	Rpl7l1	ribosomal protein L7-like 1	2986,3312,3193	4077,4070,4055	0.558088	4.78e-07
NM_026042.3	Med29	mediator complex subunit 29	475,559,444	693,643,582	0.556806	0.0008602
NM_008831.4	Phb	prohibitin	1905,2196,1796	2635,2583,2397	0.556436	4.96e-05
NM_145445.4	Eif2b2	eukaryotic translation initiation factor 2B, subunit 2 beta	1085,1246,1053	1520,1505,1342	0.556013	8.14e-05
NM_008907.1	Ppia	peptidylprolyl isomerase A	21082,23393,19915	27214,28982,26686	0.554569	3.85e-06
NM_025656.5	Gemin2	gem (nuclear organelle) associated protein 2	222,273,231	312,331,301	0.554489	0.00209213
NM_029074.3	Cnep1r1	CTD nuclear envelope phosphatase 1 regulatory subunit 1	604,657,559	802,758,788	0.553632	0.000133545
NM_029418.4	9130401M01Rik	RIKEN cDNA 9130401M01 gene	789,820,673	1073,977,896	0.553145	0.000392846
XM_011249223.2	Psmd11	proteasome (prosome, macropain) 26S subunit, non-ATPase, 11, transcript variant X1	619,724,648	858,821,881	0.55258	7.92e-05
NM_205820.1	Tlr13	toll-like receptor 13	11038,10553,11858	14106,13421,15282	0.552267	6.05e-08
NM_027009.2	Rfc3	replication factor C (activator 1) 3	339,417,326	512,457,433	0.551293	0.00209993
NM_146047.2	Clptm1l	CLPTM1-like	5320,5385,5158	6733,6999,6583	0.551049	2.64e-07
NM_134150.2	Otub1	OTU domain, ubiquitin aldehyde binding 1	2180,2171,2026	2734,2850,2593	0.550885	3.12e-06
NM_010893.3	Neu1	neuraminidase 1	5532,6013,5207	7350,7336,6802	0.550668	8.54e-06
NM_011803.2	Klf6	Kruppel-like factor 6	6354,5823,6787	7973,7969,8197	0.549363	3.18e-08
NM_007874.3	Reep5	receptor accessory protein 5	4594,5080,4472	6127,6205,5786	0.548919	5.07e-06
XR_880878.2	LOC102636299	small ubiquitin-related modifier 2 pseudogene	1299,1624,1285	1952,1638,1829	0.548911	0.000352377
NM_025934.2	Riok2	RIO kinase 2 (yeast)	654,652,641	855,837,801	0.548845	3.35e-05
NM_026829.2	Mthfs	5, 10-methenyltetrahydrofolate synthetase	888,979,813	1249,1122,1072	0.548104	0.000250703
NM_008212.4	Hadh	hydroxyacyl-Coenzyme A dehydrogenase	1847,2065,1809	2463,2428,2435	0.547969	9.77e-06
NM_016706.2	Coil	coilin	260,256,258	327,361,309	0.547588	0.00105793
NM_025407.2	Uqcrc1	ubiquinol-cytochrome c reductase core protein 1	4583,5057,4254	6200,6131,5472	0.547395	3.35e-05
NM_172488.2	Lacc1	laccase (multicopper oxidoreductase) domain containing 1	459,482,439	654,570,548	0.547102	0.000550249
NM_144857.1	Rrp36	ribosomal RNA processing 36 homolog (S. cerevisiae)	86,122,83	141,126,118	0.546383	0.0407854
NM_178601.3	Imp4	IMP4, U3 small nucleolar ribonucleoprotein	1515,1480,1450	1804,1982,1887	0.545768	1.26e-06
NM_025310.2	Ftsj3	FtsJ RNA methyltransferase homolog 3 (E. coli)	1748,2026,1779	2210,2506,2397	0.545487	9.74e-06
NM_172721.2	Fbxw8	F-box and WD-40 domain protein 8	2252,2120,2211	2792,2899,2687	0.545338	6.03e-07
NM_175770.4	Taf7	TATA-box binding protein associated factor 7	369,444,392	502,504,542	0.544561	0.000421032
NM_008467.4	Kpna4	karyopherin (importin) alpha 4	2998,2785,3218	3456,3883,4112	0.544513	1.66e-07
NM_001038663.1	Mapk1	mitogen-activated protein kinase 1, transcript variant 2	247,296,273	330,340,381	0.544341	0.00132464
NM_172594.2	Dhx29	DEAH (Asp-Glu-Ala-His) box polypeptide 29	852,732,848	993,1081,1024	0.544301	9.22e-06
NM_028873.4	Dnajc14	DnaJ heat shock protein family (Hsp40) member C14	208,215,143	252,241,246	0.54407	0.0129717
NM_025825.3	Appbp2	amyloid beta precursor protein (cytoplasmic tail) binding protein 2	645,476,744	718,831,833	0.54398	0.0005009
NM_030719.3	Gatsl2	GATS protein-like 2	390,238,429	403,444,514	0.543975	0.00612258
NM_025716.2	Spryd4	SPRY domain containing 4	369,355,316	437,494,407	0.54383	0.00101952
NM_009870.3	Cdk4	cyclin-dependent kinase 4	378,441,385	474,511,563	0.543641	0.000445955
NM_013718.2	Trappc3	trafficking protein particle complex 3	1796,2017,1892	2422,2561,2285	0.542331	7.87e-06
NM_172310.2	Tarsl2	threonyl-tRNA synthetase-like 2	185,162,208	234,247,232	0.542192	0.0036428
NM_181821.1	Hcfc1r1	host cell factor C1 regulator 1 (XPO1-dependent)	1112,1208,1107	1481,1517,1371	0.541993	2.4e-05
NM_017366.3	Acadvl	acyl-Coenzyme A dehydrogenase, very long chain	2075,2346,2150	2734,2830,2804	0.541668	3.45e-06
NM_053075.3	Rheb	Ras homolog enriched in brain	2015,2215,1954	2727,2628,2517	0.540064	2.04e-05
NM_025794.2	Etfdh	electron transferring flavoprotein, dehydrogenase	1174,1273,1157	1536,1543,1505	0.538932	1.46e-05
NM_001013375.1	Utp18	UTP18 small subunit processome component	382,393,378	515,516,441	0.538916	0.000613012
NM_153053.4	Sf3b4	splicing factor 3b, subunit 4	2116,2228,2023	2742,2766,2584	0.538692	8.26e-06
NM_026396.3	Brix1	BRX1, biogenesis of ribosomes	855,957,832	1153,1142,1074	0.538469	8.62e-05
NM_009949.2	Cpt2	carnitine palmitoyltransferase 2	686,706,675	885,908,835	0.537818	4.7e-05
XM_006527849.2	Ikbkg	inhibitor of kappaB kinase gamma, transcript variant X3	120,80,96	147,114,125	0.537791	0.0399867
NM_011482.4	Nhp2l1	NHP2 non-histone chromosome protein 2-like 1 (S. cerevisiae)	1945,2091,1861	2449,2571,2475	0.537546	6.95e-06
XR_140938.4	Gm10080	predicted gene 10080	265,240,220	313,323,294	0.537357	0.00264761
NM_026033.2	Gatad1	GATA zinc finger domain containing 1	1391,1447,1350	1802,1760,1749	0.536369	9.04e-06
NM_025962.3	Mmachc	methylmalonic aciduria cblC type, with homocystinuria	208,204,210	262,280,254	0.536112	0.00249365
NM_028850.5	Chic2	cysteine-rich hydrophobic domain 2	995,1107,914	1350,1296,1197	0.535946	0.000212733
XM_006521906.3	Yeats2	YEATS domain containing 2, transcript variant X6	2470,3114,2644	3774,3333,3363	0.53528	0.000156793
NM_001177658.1	Mrpl15	mitochondrial ribosomal protein L15, transcript variant 1	201,222,156	263,256,230	0.535219	0.0120907
XR_374337.3	Vis1	viral integration site 1	511,451,468	596,568,654	0.535158	0.000203378
NM_009103.3	Rrm1	ribonucleotide reductase M1	1071,1119,1094	1354,1434,1371	0.534779	5.31e-06
NM_016957.3	Hmgn2	high mobility group nucleosomal binding domain 2	1993,1958,1956	2603,2600,2268	0.534531	1.28e-05
NM_010591.2	Jun	jun proto-oncogene	4397,5203,4691	6123,6278,5705	0.53387	1.49e-05
NM_144875.2	Rab29	RAB29, member RAS oncogene family	493,626,458	702,666,651	0.533757	0.00186207
NM_001004143.4	Usp22	ubiquitin specific peptidase 22	1754,1595,1972	2072,2384,2257	0.53367	1.75e-06
NM_133887.4	Stx12	syntaxin 12	2507,2334,2460	3112,2921,3171	0.533214	1.5e-06
NM_019491.5	Rala	v-ral simian leukemia viral oncogene A (ras related)	1581,1561,1356	1956,1916,1834	0.53251	5.74e-05
NM_023422.3	Hist1h2bc	histone cluster 1, H2bc, transcript variant 1	168,253,169	260,296,211	0.532074	0.0239677
NM_025304.3	Lcmt1	leucine carboxyl methyltransferase 1	232,215,199	289,281,256	0.532029	0.00430719
NM_007761.2	Crcp	calcitonin gene-related peptide-receptor component protein	927,1053,937	1312,1271,1114	0.53173	0.000199103
NM_025605.3	Lamtor1	late endosomal/lysosomal adaptor, MAPK and MTOR activator 1	6070,6719,5762	8369,7839,7279	0.53159	5.1e-05
NM_145354.5	Nsun2	NOL1/NOP2/Sun domain family member 2	2568,2678,2655	3366,3364,3234	0.531558	1.36e-06
NM_025546.2	Rsl1d1	ribosomal L1 domain containing 1	1802,2121,1905	2385,2524,2464	0.531397	1.39e-05
XM_003945446.4	Gm10698	predicted gene 10698	3662,3255,3469	4389,4199,4499	0.530939	1.15e-06
NM_134041.3	4930427A07Rik	RIKEN cDNA 4930427A07 gene	164,145,153	185,205,202	0.530423	0.00732264
NM_007536.2	Bcl2a1d	B cell leukemia/lymphoma 2 related protein A1d	1469,1788,1569	2060,2058,1991	0.530255	5.35e-05
NM_013549.2	Hist2h2aa1	histone cluster 2, H2aa1	474,641,504	783,744,544	0.529672	0.00647716
NM_026609.2	Leprotl1	leptin receptor overlapping transcript-like 1	1802,1849,1719	2404,2186,2185	0.529197	2.81e-05
NM_021535.4	Smu1	smu-1 suppressor of mec-8 and unc-52 homolog (C. elegans)	2250,2372,2265	2924,2901,2849	0.528759	3.15e-06
NM_139143.3	Slc39a6	solute carrier family 39 (metal ion transporter), member 6	998,922,983	1121,1307,1233	0.528162	7.81e-06
NM_023633.3	2410016O06Rik	RIKEN cDNA 2410016O06 gene	419,517,387	576,578,533	0.527991	0.00213044
NM_027008.2	Kctd5	potassium channel tetramerisation domain containing 5	704,767,679	958,910,851	0.527833	0.00023142
NM_145985.4	Arcn1	archain 1	4948,4405,4896	5704,5920,6271	0.527412	1.83e-07
NM_026550.3	Pak1ip1	PAK1 interacting protein 1	1367,1523,1364	1813,1835,1719	0.526926	3.22e-05
NM_172338.2	Dnajc16	DnaJ heat shock protein family (Hsp40) member C16	1061,835,1082	1268,1180,1295	0.526737	7.91e-05
NM_028883.2	Tldc1	TBC/LysM associated domain containing 1	399,354,381	487,485,460	0.526194	0.000436424
NM_026344.3	Dph2	DPH2 homolog	438,440,504	560,634,548	0.524593	0.000223951
NR_033619.1	Gm6623	predicted gene 6623	188,178,189	208,235,264	0.524149	0.00520668
NM_172666.3	Agps	alkylglycerone phosphate synthase	2840,2408,2922	3191,3415,3632	0.523918	1.59e-06
NM_144887.4	Zdhhc5	zinc finger, DHHC domain containing 5	2757,2199,2865	3012,3326,3469	0.523362	8.84e-06
NM_026611.2	Rnaset2b	ribonuclease T2B	9038,9228,8526	12019,11052,10571	0.523358	1.87e-05
NR_002883.1	Gm5643	predicted gene 5643	722,728,773	933,953,903	0.523278	2.77e-05
NM_025334.3	Txndc12	thioredoxin domain containing 12 (endoplasmic reticulum)	1400,1708,1461	1974,1913,1874	0.523273	0.000114661
NM_011933.2	Decr2	2-4-dienoyl-Coenzyme A reductase 2, peroxisomal	488,479,463	639,624,540	0.523108	0.00060012
NM_007657.3	Cd9	CD9 antigen	12408,14251,12693	15654,17375,16476	0.522933	5.06e-06
NM_177445.5	Dars	aspartyl-tRNA synthetase, transcript variant 1	1307,1395,1410	1722,1711,1720	0.521874	5.66e-06
NM_023311.3	Yipf5	Yip1 domain family, member 5	1263,1349,1352	1663,1658,1647	0.521687	6.92e-06
NM_178668.3	Pde12	phosphodiesterase 12	592,596,603	705,799,748	0.521567	5.75e-05
NM_029979.3	Trim35	tripartite motif-containing 35	3123,2977,3065	3749,4038,3679	0.521032	1.13e-06
NM_009786.2	Cacybp	calcyclin binding protein	2183,2482,2347	2960,2989,2851	0.520665	9.8e-06
NM_001163379.1	Agpat1	1-acylglycerol-3-phosphate O-acyltransferase 1 (lysophosphatidic acid acyltransferase, alpha), transcript variant 1	125,120,126	164,161,148	0.51953	0.0177893
NM_026441.4	Pef1	penta-EF hand domain containing 1	1517,1573,1426	1987,1931,1747	0.51916	7.71e-05
NM_025513.3	Exosc3	exosome component 3	559,773,571	822,863,726	0.518824	0.0032925
NM_029825.3	Scfd1	Sec1 family domain containing 1, transcript variant 1	96,110,82	140,120,112	0.517944	0.0495291
NM_026444.3	Cs	citrate synthase	6137,5721,5894	7124,7635,7405	0.517914	2.67e-07
NM_025468.2	Sec11c	SEC11 homolog C, signal peptidase complex subunit	197,221,200	262,284,237	0.517339	0.00630098
NM_001168658.1	Ccdc127	coiled-coil domain containing 127, transcript variant 3	122,118,141	175,156,153	0.517313	0.0193188
NM_015751.2	Abce1	ATP-binding cassette, sub-family E (OABP), member 1	151,189,146	220,212,188	0.516708	0.0179582
NR_015555.1	4933404O12Rik	RIKEN cDNA 4933404O12 gene	148,148,149	187,207,171	0.516109	0.0126839
NM_053071.2	Cox6c	cytochrome c oxidase subunit VIc	2180,2535,1931	2942,2761,2659	0.516091	0.000509271
NM_001308482.1	Whsc1l1	Wolf-Hirschhorn syndrome candidate 1-like 1 (human), transcript variant 4	241,253,287	297,334,352	0.515548	0.00193285
NM_009912.4	Ccr1	chemokine (C-C motif) receptor 1	7149,7203,6944	9239,8568,8742	0.515145	4.97e-06
NM_011596.5	Atp6v0a2	ATPase, H+ transporting, lysosomal V0 subunit A2	2232,2052,2235	2626,2810,2680	0.514473	1.04e-06
NM_030093.3	Snrnp25	small nuclear ribonucleoprotein 25 (U11/U12)	316,458,349	458,511,454	0.514303	0.00540448
XM_006504642.3	Gm15753	predicted gene 15753	171,194,199	227,245,240	0.514044	0.00576164
NM_026014.3	Cdt1	chromatin licensing and DNA replication factor 1	1209,1393,1204	1576,1691,1501	0.513906	0.000126392
NM_178772.3	Nceh1	neutral cholesterol ester hydrolase 1	133,84,152	131,154,187	0.51295	0.044872
NM_021303.2	Noc2l	NOC2 like nucleolar associated transcriptional repressor	388,515,385	562,563,501	0.512427	0.00431355
NM_029561.4	Ndfip2	Nedd4 family interacting protein 2, transcript variant 1	128,145,148	181,181,171	0.5123	0.0149197
NM_007450.4	Slc25a4	solute carrier family 25 (mitochondrial carrier, adenine nucleotide translocator), member 4	3214,3246,2860	3817,4161,3670	0.512094	3.82e-05
NM_053089.3	Naa15	N(alpha)-acetyltransferase 15, NatA auxiliary subunit	2093,2077,2401	2508,2716,2942	0.511497	2.42e-06
NM_021437.2	1700123O20Rik	RIKEN cDNA 1700123O20 gene	751,816,765	961,985,964	0.511117	7.37e-05
NM_023423.3	Akirin1	akirin 1	3190,3205,3143	3972,3885,4001	0.511081	2.4e-06
NM_144923.3	Blvrb	biliverdin reductase B (flavin reductase (NADPH)), transcript variant 1	1003,1000,937	1300,1223,1142	0.510492	0.000161059
NR_015538.1	Gm2518	predicted gene 2518	120,124,135	184,170,127	0.510207	0.0334151
NM_175094.5	Pdhx	pyruvate dehydrogenase complex, component X	580,613,596	744,714,772	0.509261	0.000158642
NM_019913.5	Txn2	thioredoxin 2	3061,3352,2974	3952,4023,3712	0.509106	3.28e-05
NM_172695.2	Plaa	phospholipase A2, activating protein	2489,2353,2365	2952,2993,3002	0.508751	2.8e-06
NM_178385.3	Tbcc	tubulin-specific chaperone C	523,731,585	827,815,668	0.508491	0.00438733
NM_145600.1	Zfp330	zinc finger protein 330	1075,1178,1101	1362,1436,1374	0.50733	3.5e-05
XM_006514874.3	Ascc2	activating signal cointegrator 1 complex subunit 2, transcript variant X1	611,687,587	827,766,759	0.506626	0.000705049
NM_178357.3	Klf11	Kruppel-like factor 11	594,643,599	769,727,789	0.505714	0.000253374
NM_019806.5	Vapb	vesicle-associated membrane protein, associated protein B and C	4373,4632,4458	5593,5496,5585	0.505316	3.32e-06
NM_007922.5	Elk1	ELK1, member of ETS oncogene family	855,649,842	904,997,1010	0.504975	0.000216718
NM_053177.1	Mcoln1	mucolipin 1	3128,3059,3180	3721,4134,3726	0.503451	1.92e-06
NM_017375.3	Ostf1	osteoclast stimulating factor 1	7927,8877,7553	10496,10258,9481	0.50341	8.91e-05
NM_008300.3	Hspa4	heat shock protein 4	6651,6639,7105	8105,8455,8588	0.503219	1.75e-07
NM_009272.4	Srm	spermidine synthase	792,799,717	939,1081,854	0.502812	0.000637602
NM_026744.3	Mrpl53	mitochondrial ribosomal protein L53	408,537,412	630,565,504	0.502329	0.00661543
NM_026486.3	Tctn2	tectonic family member 2	104,98,98	136,127,117	0.502107	0.0400178
NM_013841.3	Vps45	vacuolar protein sorting 45	186,255,173	253,267,257	0.502016	0.0193147
NM_009273.4	Srp14	signal recognition particle 14	2312,2620,2123	3006,3005,2756	0.501387	0.000280467
NM_175534.3	Mrgpre	MAS-related GPR, member E	534,677,622	726,736,818	0.501057	0.00072187
NM_028264.4	Tmem55a	transmembrane protein 55A	922,1053,1070	1265,1233,1266	0.500776	7.13e-05
XM_006512829.3	Gtf3c6	general transcription factor IIIC, polypeptide 6, alpha, transcript variant X1	227,265,230	287,335,282	0.500356	0.00639912
NM_026943.1	Snrpd2	small nuclear ribonucleoprotein D2	1337,1654,1292	1785,1967,1586	0.500191	0.00129397
NM_177648.3	Dolk	dolichol kinase	594,587,542	750,709,676	0.498939	0.000638931
NM_001040396.2	Selt	selenoprotein T	4404,4460,4786	5522,5266,6020	0.498914	3.16e-06
NM_182805.3	Gpt	glutamic pyruvic transaminase, soluble	198,232,153	242,264,231	0.498585	0.0234346
NM_025594.3	Zmat2	zinc finger, matrin type 2	2581,3003,2644	3514,3364,3257	0.49701	0.000125886
NM_007620.2	Cbr1	carbonyl reductase 1	671,814,644	874,939,834	0.496847	0.00136962
NM_133724.3	Bloc1s4	biogenesis of lysosomal organelles complex-1, subunit 4, cappuccino	643,708,553	905,782,680	0.49573	0.00556892
NM_010736.3	Ltbr	lymphotoxin B receptor	2748,2832,2491	3530,3396,3035	0.495443	0.000212429
NM_007479.3	Arf4	ADP-ribosylation factor 4	5945,6640,6111	7854,7621,7535	0.494987	2.13e-05
XM_011250230.2	Themis2	thymocyte selection associated family member 2, transcript variant X1	1019,1178,928	1494,1163,1218	0.494882	0.00348765
NM_001039536.2	Pigl	phosphatidylinositol glycan anchor biosynthesis, class L	190,157,173	204,221,223	0.493762	0.0111838
NM_017475.2	Rragc	Ras-related GTP binding C	9077,9056,8826	11155,10971,10972	0.493327	3.28e-06
NM_011734.3	Siae	sialic acid acetylesterase	1152,934,1250	1351,1299,1442	0.492781	0.000176003
NM_010799.2	Minpp1	multiple inositol polyphosphate histidine phosphatase 1	1195,1210,1134	1425,1462,1468	0.492457	4.6e-05
NM_178922.3	Hic2	hypermethylated in cancer 2	190,138,206	233,220,210	0.492299	0.0188743
NM_153570.2	Noc4l	NOC4 like	866,944,909	1127,1214,1007	0.491966	0.000310799
NM_001013817.2	Sp140	Sp140 nuclear body protein	1115,1003,1293	1227,1441,1522	0.491832	0.000105959
NR_002322.2	Tug1	taurine upregulated gene 1, transcript variant b	178,143,170	189,188,235	0.490965	0.017772
NM_019770.2	Tmed2	transmembrane emp24 domain trafficking protein 2	8341,8190,7865	10048,9803,10055	0.490319	6.11e-06
NM_029814.1	Chmp5	charged multivesicular body protein 5	2376,2590,2466	3139,2920,3055	0.49024	3.67e-05
NM_027315.4	Ube2q1	ubiquitin-conjugating enzyme E2Q family member 1	4095,4467,4133	5286,5136,5156	0.490036	2.11e-05
NM_153150.2	Slc25a1	solute carrier family 25 (mitochondrial carrier, citrate transporter), member 1	2514,2273,2142	2898,2941,2673	0.489976	0.00012246
NM_009090.5	Polr2c	polymerase (RNA) II (DNA directed) polypeptide C	840,1049,826	1129,1204,1026	0.489909	0.00180107
NM_153074.3	Lrrc25	leucine rich repeat containing 25	3387,2974,2732	4011,3784,3388	0.489805	0.000527895
XR_878063.1	Llph-ps2	LLP homolog, pseudogene 2	663,799,655	873,916,826	0.489629	0.00122776
NM_011498.4	Bhlhe40	basic helix-loop-helix family, member e40	3701,3887,3990	4604,4837,4726	0.489542	1.89e-06
NM_025377.3	Ska2	spindle and kinetochore associated complex subunit 2	111,103,100	129,135,130	0.48914	0.0394552
NM_026406.3	Rnf115	ring finger protein 115	199,239,186	275,237,265	0.488034	0.0169203
NM_053157.2	Tm2d1	TM2 domain containing 1	176,157,149	218,209,173	0.487352	0.0246381
NM_177140.3	Tmem251	transmembrane protein 251, transcript variant 1	142,128,109	160,182,134	0.487154	0.0448059
NM_025668.3	Spcs2	signal peptidase complex subunit 2 homolog (S. cerevisiae)	114,130,149	162,167,160	0.486684	0.0270554
NM_172416.3	Ostm1	osteopetrosis associated transmembrane protein 1	3093,3130,3273	3829,3871,3885	0.48655	2.45e-06
NM_001033290.2	Gpr55	G protein-coupled receptor 55	249,255,293	281,356,347	0.48635	0.00438733
NM_001289926.1	2010111I01Rik	RIKEN cDNA 2010111I01 gene, transcript variant 2	476,528,465	615,617,575	0.485888	0.001337
NM_139229.4	Cog8	component of oligomeric golgi complex 8	1176,1119,1128	1377,1472,1338	0.485583	5.73e-05
NM_145836.2	Irf2bpl	interferon regulatory factor 2 binding protein-like	2191,2119,2223	2715,2699,2552	0.484843	1.42e-05
NM_001081265.1	Dnaaf5	dynein, axonemal assembly factor 5	638,539,600	734,726,714	0.484735	0.000420135
NM_007748.3	Cox6a1	cytochrome c oxidase subunit VIa polypeptide 1	3812,4515,3495	5283,4992,4265	0.484259	0.00183988
NM_178212.3	Hist2h2aa2	histone cluster 2, H2aa2	441,574,477	702,653,489	0.484241	0.0123147
NM_172120.4	Vps41	VPS41 HOPS complex subunit	293,214,312	276,350,386	0.48392	0.0115316
NM_007414.3	Adprh	ADP-ribosylarginine hydrolase	2772,2995,2598	3484,3552,3196	0.483879	0.000179356
NM_172876.2	Gpatch3	G patch domain containing 3	386,426,387	530,481,462	0.483765	0.00293575
NM_029976.3	Cdkn2aipnl	CDKN2A interacting protein N-terminal like	1338,1594,1422	1814,1774,1738	0.482934	0.000254063
NM_024211.3	Slc25a11	solute carrier family 25 (mitochondrial carrier oxoglutarate carrier), member 11	234,219,223	311,278,244	0.482907	0.0123611
NM_025323.2	Sf3b6	splicing factor 3B, subunit 6	1394,1640,1333	1866,1826,1661	0.481563	0.00094859
NM_008636.4	Mtf1	metal response element binding transcription factor 1	918,899,972	1041,1192,1169	0.481433	4.32e-05
NM_027338.1	Vps36	vacuolar protein sorting 36	706,649,730	870,853,817	0.481086	0.000224374
NM_025385.3	Prr13	proline rich 13, transcript variant 1	90,118,115	137,136,130	0.480905	0.0489734
NM_007633.2	Ccne1	cyclin E1	272,338,287	363,402,341	0.480851	0.00726356
NM_001304528.1	Gm4737	predicted gene 4737	1235,1309,1222	1500,1649,1450	0.480664	0.000131616
NM_025537.3	Tsfm	Ts translation elongation factor, mitochondrial	452,537,443	579,616,564	0.480285	0.00250505
NM_013750.2	Phlda3	pleckstrin homology like domain, family A, member 3	186,197,191	250,252,206	0.480222	0.0160028
NM_010721.2	Lmnb1	lamin B1	509,549,621	649,760,640	0.479161	0.000883777
NM_026399.2	Wdr83	WD repeat domain containing 83	569,592,504	693,685,661	0.478773	0.00150857
NM_144826.3	Utp6	UTP6 small subunit processome component	1621,1498,1537	1812,1900,1952	0.478711	2.01e-05
NM_011755.2	Zfp35	zinc finger protein 35	671,706,643	754,842,874	0.478142	0.000417424
NM_001001187.3	Zfp738	zinc finger protein 738	316,225,384	372,362,397	0.477264	0.0133573
NM_027446.2	Eef2kmt	eukaryotic elongation factor 2 lysine methyltransferase	799,886,837	1060,1059,953	0.477079	0.000484098
NM_009797.2	Capza1	capping protein (actin filament) muscle Z-line, alpha 1	254,206,255	254,294,330	0.476736	0.00876809
NM_024213.2	Anapc4	anaphase promoting complex subunit 4	1368,1354,1339	1657,1568,1705	0.475401	6.97e-05
NM_011149.2	Ppib	peptidylprolyl isomerase B	5141,5727,4916	6678,6502,6019	0.47474	0.000245673
NM_026453.3	Mak16	MAK16 homolog	937,1111,993	1239,1292,1171	0.474443	0.000546962
NM_025500.2	Mrpl37	mitochondrial ribosomal protein L37	1027,1162,1048	1241,1397,1302	0.473901	0.000239262
NM_133763.1	Dnttip1	deoxynucleotidyltransferase, terminal, interacting protein 1	813,917,723	1087,971,938	0.47378	0.00325242
NM_009227.3	Snrpe	small nuclear ribonucleoprotein E	1175,1495,1128	1637,1558,1447	0.472907	0.0032316
NM_025544.2	Mrps15	mitochondrial ribosomal protein S15	1104,1330,1104	1535,1463,1309	0.472768	0.00181752
NM_175127.2	Fbxo28	F-box protein 28	1646,1566,1702	1936,2048,1958	0.472753	1.38e-05
NM_080559.1	Sh3bgrl3	SH3 domain binding glutamic acid-rich protein-like 3	7108,7905,6743	8768,9596,8083	0.47183	0.000297987
NM_180678.3	Gars	glycyl-tRNA synthetase	2370,2478,2424	2965,2983,2846	0.471387	3.16e-05
XR_868409.2	Gm7931	predicted pseudogene 7931	642,699,590	840,804,708	0.47124	0.00287741
NM_018753.6	Ywhab	tyrosine 3-monooxygenase/tryptophan 5-monooxygenase activation protein, beta polypeptide	226,172,210	246,273,225	0.471061	0.0170706
NM_198168.3	Ppp2r5b	protein phosphatase 2, regulatory subunit B', beta	782,839,686	913,983,916	0.470983	0.00130296
NM_033074.3	Tars	threonyl-tRNA synthetase	1634,1631,1777	2062,2074,1950	0.470861	3.45e-05
NM_017382.5	Rab11a	RAB11A, member RAS oncogene family	4180,4672,4081	5484,5136,5083	0.470378	0.000200201
NM_011657.2	Tulp3	tubby-like protein 3	181,187,167	211,251,196	0.470136	0.0225931
NM_025541.3	Asf1a	anti-silencing function 1A histone chaperone	144,205,173	238,199,206	0.470122	0.0370052
NM_019993.3	Aldh9a1	aldehyde dehydrogenase 9, subfamily A1	682,590,697	796,772,812	0.469706	0.00039378
NM_024457.2	Rap1b	RAS related protein 1b	15498,15459,15384	19274,17943,18822	0.469486	1.21e-05
NM_177325.3	Tsr1	TSR1 20S rRNA accumulation	751,710,843	912,963,906	0.468835	0.000197525
NM_013736.4	Tceb3	transcription elongation factor B (SIII), polypeptide 3	3495,3200,3673	4068,4234,4181	0.468665	4.3e-06
NM_025760.4	Hacd4	3-hydroxyacyl-CoA dehydratase 4	986,655,1063	1059,1005,1210	0.468472	0.00572739
XR_001777995.1	Rnf141	ring finger protein 141, transcript variant X3	283,196,294	268,351,325	0.468075	0.0167143
NM_026873.2	Ptcd2	pentatricopeptide repeat domain 2	902,1020,895	1142,1102,1170	0.467576	0.000579203
NM_007451.4	Slc25a5	solute carrier family 25 (mitochondrial carrier, adenine nucleotide translocator), member 5	10654,10908,9909	12972,12749,12368	0.467122	5.2e-05
NM_026369.2	Arpc5	actin related protein 2/3 complex, subunit 5	12755,13542,12302	16176,15607,14810	0.466828	9.18e-05
NM_026130.1	Srpr	signal recognition particle receptor ('docking protein')	4075,3780,3881	4629,4833,4674	0.466568	1.01e-05
NM_024467.3	Zfp319	zinc finger protein 319	989,824,980	1102,1197,1069	0.466531	0.000295985
NM_010318.2	Gng5	guanine nucleotide binding protein (G protein), gamma 5	4165,4643,3695	5506,5082,4575	0.466433	0.00175921
NM_010871.2	Naip6	NLR family, apoptosis inhibitory protein 6	2070,1554,2315	2202,2305,2633	0.466002	0.00114095
NM_026552.3	Arpc4	actin related protein 2/3 complex, subunit 4, transcript variant 1	268,287,292	323,373,333	0.465541	0.00504239
NM_001110276.1	Itsn1	intersectin 1 (SH3 domain protein 1A), transcript variant 3	189,206,236	257,267,243	0.465009	0.0129775
NM_024433.2	Mtap	methylthioadenosine phosphorylase	752,799,771	881,955,969	0.464719	0.000247529
NM_011338.2	Ccl9	chemokine (C-C motif) ligand 9	15940,14526,12910	18366,17686,16508	0.463735	0.000407472
NM_178918.3	Utp15	UTP15 small subunit processome component	1185,1057,1212	1322,1377,1453	0.463101	6.46e-05
NM_175103.3	Bola2	bolA-like 2 (E. coli)	1001,1205,1029	1261,1515,1148	0.462826	0.00287754
NM_025348.2	Ndufa3	NADH dehydrogenase (ubiquinone) 1 alpha subcomplex, 3	1047,1346,1046	1429,1446,1297	0.462801	0.00328323
NM_053162.2	Mrpl34	mitochondrial ribosomal protein L34	589,633,519	716,761,634	0.461757	0.00428711
NM_181410.3	Gtf2h3	general transcription factor IIH, polypeptide 3	611,673,600	742,847,690	0.461291	0.00219463
NM_053102.2	2020-09-15	selenoprotein 15	7913,8272,7420	9784,9401,9240	0.461113	0.000110847
NM_024439.3	Vimp	VCP-interacting membrane protein	1490,1632,1408	1950,1785,1724	0.460577	0.000995262
NM_198653.2	Iars2	isoleucine-tRNA synthetase 2, mitochondrial	1097,1278,1137	1390,1417,1426	0.460562	0.000422394
NM_023671.2	Clns1a	chloride channel, nucleotide-sensitive, 1A	1489,1700,1589	1911,1974,1864	0.459999	0.000194312
XM_001476571.4	Gm3244	predicted pseudogene 3244	367,390,349	454,463,419	0.458228	0.0047767
NM_025562.3	Fis1	fission, mitochondrial 1, transcript variant 1	180,197,174	240,225,205	0.457955	0.0255588
NM_008202.2	Slc39a7	solute carrier family 39 (zinc transporter), member 7, transcript variant 1	156,161,199	207,205,213	0.457255	0.022713
NM_026041.2	Rrp15	ribosomal RNA processing 15 homolog (S. cerevisiae)	495,519,519	576,609,659	0.456848	0.00101494
NM_023175.1	Nit2	nitrilase family, member 2	580,677,570	739,751,713	0.456719	0.00249365
NM_009938.4	Copa	coatomer protein complex subunit alpha	820,460,952	751,897,1055	0.456512	0.033482
NM_025800.3	Ppp1r2	protein phosphatase 1, regulatory (inhibitor) subunit 2	1932,2149,2039	2434,2431,2468	0.456358	0.000100242
NM_001081210.1	Mrpl44	mitochondrial ribosomal protein L44	680,769,650	877,849,802	0.456347	0.00238288
NM_053100.2	Trim8	tripartite motif-containing 8	1135,1009,1080	1289,1314,1256	0.456078	0.000190607
NM_010655.3	Kpna2	karyopherin (importin) alpha 2	1413,1437,1272	1570,1700,1684	0.455826	0.000305743
NM_153560.4	Fam102a	family with sequence similarity 102, member A	1090,1192,1251	1347,1586,1302	0.455336	0.000491594
NM_133838.4	Ehd4	EH-domain containing 4	202,164,250	244,284,216	0.453857	0.0322489
NM_001324550.1	Gm6712	predicted gene 6712	163,190,188	214,216,225	0.453764	0.021118
NM_001290624.1	Prickle3	prickle planar cell polarity protein 3	216,274,210	280,301,269	0.452718	0.0234677
NM_011072.4	Pfn1	profilin 1	26732,29295,24208	34036,33645,28428	0.45247	0.00146428
NM_001282737.1	Magoh	mago homolog, exon junction complex core component	775,913,752	987,989,953	0.450314	0.00232765
NM_026503.3	Sdhaf4	succinate dehydrogenase complex assembly factor 4	354,466,334	484,458,454	0.450294	0.0176196
NM_001110242.1	1810043H04Rik	RIKEN cDNA 1810043H04 gene	390,482,402	576,529,429	0.450028	0.0171803
NM_010193.4	Fem1b	feminization 1 homolog b (C. elegans)	1948,1620,1917	2027,2156,2353	0.449988	0.000130146
NM_133964.2	Dohh	deoxyhypusine hydroxylase/monooxygenase	1379,1558,1329	1820,1800,1498	0.449975	0.00252087
NM_021524.2	Nampt	nicotinamide phosphoribosyltransferase	6042,5188,5946	7106,6613,6737	0.449913	6.78e-05
NM_153789.3	Mylip	myosin regulatory light chain interacting protein	2095,2428,2312	2766,2566,2823	0.449901	0.000310312
NM_016661.3	Ahcy	S-adenosylhomocysteine hydrolase	1089,1221,1136	1314,1510,1298	0.449694	0.000630385
NR_033228.1	E030024N20Rik	RIKEN cDNA E030024N20 gene	519,643,427	648,683,593	0.448682	0.018518
NM_007386.2	Aco1	aconitase 1	2420,2084,2346	2584,2755,2803	0.447923	4.41e-05
NM_011843.2	Esyt1	extended synaptotagmin-like protein 1	17549,16721,17122	20219,20582,20450	0.447184	6.31e-06
NM_008466.5	Kpna3	karyopherin (importin) alpha 3	1633,1503,1751	1906,1888,2004	0.446819	6.74e-05
NM_025682.3	Pspc1	paraspeckle protein 1	150,126,143	161,175,170	0.445975	0.0389119
NM_028419.3	Glrx5	glutaredoxin 5	912,1066,830	1144,1207,1016	0.445811	0.00525082
NM_026511.2	Apopt1	apoptogenic, mitochondrial 1, transcript variant 2	237,263,199	298,283,263	0.445641	0.0287206
NM_026529.4	2700062C07Rik	RIKEN cDNA 2700062C07 gene	340,328,320	411,415,356	0.445378	0.00837273
NM_053103.5	Entpd7	ectonucleoside triphosphate diphosphohydrolase 7	741,536,731	738,836,817	0.445009	0.00306769
NM_133737.2	Lancl2	LanC (bacterial lantibiotic synthetase component C)-like 2	334,296,293	356,371,378	0.44493	0.00709429
XR_001785077.1	Wdr91	WD repeat domain 91, transcript variant X3	1384,1222,1513	1464,1660,1767	0.444691	0.000221522
NM_138745.2	Mthfd1	methylenetetrahydrofolate dehydrogenase (NADP+ dependent), methenyltetrahydrofolate cyclohydrolase, formyltetrahydrofolate synthase	918,833,946	1028,1132,1040	0.443644	0.000298371
NM_146032.3	Srp68	signal recognition particle 68	2639,2658,2558	3052,3144,3127	0.443541	6.32e-05
NM_024461.2	1810037I17Rik	RIKEN cDNA 1810037I17 gene	1002,1096,899	1232,1285,1063	0.442998	0.00416116
NM_027222.3	Mzb1	marginal zone B and B1 cell-specific protein 1	182,270,247	271,308,263	0.442539	0.0335821
NM_026610.1	Ndufb4	NADH dehydrogenase (ubiquinone) 1 beta subcomplex 4	926,990,791	1143,1095,995	0.442487	0.00499512
NM_172625.2	Ino80c	INO80 complex subunit C	1321,1400,1311	1608,1648,1542	0.44246	0.000333823
NM_011765.5	Zfp97	zinc finger protein 97	332,356,342	404,358,470	0.442256	0.0105349
NM_153142.3	Slc35e4	solute carrier family 35, member E4	793,933,796	1058,1069,881	0.441922	0.00507134
NM_008927.3	Map2k1	mitogen-activated protein kinase kinase 1	315,265,351	356,428,326	0.440941	0.0148452
NM_134138.1	Psmg2	proteasome (prosome, macropain) assembly chaperone 2	403,501,397	530,539,488	0.440777	0.0110094
NM_016924.2	Rwdd2b	RWD domain containing 2B	252,263,247	320,286,304	0.44001	0.014938
NM_008248.2	Hint1	histidine triad nucleotide binding protein 1	3256,3943,2950	4351,4088,3670	0.439839	0.00563188
XM_006521630.2	Tdg-ps	thymine DNA glycosylase, pseudogene	180,193,166	212,250,187	0.438858	0.0419782
NM_026484.3	Ccny	cyclin Y	2810,2706,2590	3272,3016,3304	0.438804	0.000280467
XR_140686.3	Gm20875	predicted gene, 20875	558,689,516	726,758,625	0.43866	0.0136795
NM_016784.3	Plrg1	pleiotropic regulator 1	1267,1358,1307	1507,1587,1561	0.438528	0.000220917
XM_017318027.1	LOC108168395	zinc finger protein 431-like	236,238,249	296,289,276	0.438267	0.0136698
XM_006510038.3	Stt3a	STT3, subunit of the oligosaccharyltransferase complex, homolog A (S. cerevisiae), transcript variant X1	191,200,204	241,246,223	0.4368	0.0224084
NM_027490.1	Dcp2	decapping mRNA 2	1026,1049,1257	1215,1332,1383	0.435642	0.000392367
NM_027181.1	Pin4	protein (peptidyl-prolyl cis/trans isomerase) NIMA-interacting, 4 (parvulin)	518,647,480	695,686,583	0.435337	0.0168535
NM_053074.2	Nup62	nucleoporin 62	1996,2019,1921	2292,2418,2296	0.434554	0.00017648
NM_198937.2	Hn1l	hematological and neurological expressed 1-like	1082,949,1112	1181,1279,1242	0.434176	0.000277079
NM_025772.4	Dtnbp1	dystrobrevin binding protein 1	1068,1294,1180	1484,1414,1289	0.433657	0.00278648
NM_019794.4	Dnaja2	DnaJ heat shock protein family (Hsp40) member A2	3736,3999,3702	4508,4530,4447	0.433458	0.000169642
NM_031156.3	Ide	insulin degrading enzyme	1908,1620,1915	2011,2145,2249	0.433325	0.000145441
NM_183034.1	Plekhm1	pleckstrin homology domain containing, family M (with RUN domain) member 1	9474,9695,10683	11120,11862,12083	0.432878	9.95e-06
NM_023232.3	Diablo	diablo, IAP-binding mitochondrial protein	980,1081,923	1155,1217,1158	0.432048	0.00171435
NM_175095.4	Commd2	COMM domain containing 2	837,934,808	1045,1008,996	0.431967	0.00241965
NM_029250.2	Etnk1	ethanolamine kinase 1	4563,4632,5446	5383,5652,6157	0.431834	6.34e-05
NM_029157.3	Sf3a3	splicing factor 3a, subunit 3	1462,1656,1466	1780,2004,1636	0.431456	0.00196612
NM_175175.4	Plekhf2	pleckstrin homology domain containing, family F (with FYVE domain) member 2	1319,1451,1370	1716,1575,1581	0.430297	0.00104222
NM_001256493.1	2210404O09Rik	RIKEN cDNA 2210404O09 gene	169,166,170	203,192,206	0.43005	0.0337827
NM_019443.2	Ndufa1	NADH dehydrogenase (ubiquinone) 1 alpha subcomplex, 1	1266,1493,1195	1619,1688,1371	0.428855	0.0067082
NM_001113358.1	Dad1	defender against cell death 1, transcript variant 1	312,414,301	371,446,410	0.428846	0.0260468
NM_018815.2	Nup210	nucleoporin 210	412,483,408	513,541,489	0.428606	0.00887979
NM_175665.2	Hist1h2bk	histone cluster 1, H2bk	192,235,235	249,299,239	0.428235	0.030626
NM_030705.4	Mesdc1	mesoderm development candidate 1	1767,1685,1478	1970,2153,1699	0.428103	0.00408857
NM_144522.5	Tbc1d10b	TBC1 domain family, member 10b	3355,3463,3220	3841,4046,3892	0.426109	0.000180857
NM_030252.2	Smim12	small integral membrane protein 12	889,912,846	1069,1096,941	0.426018	0.00288039
NM_026933.2	Triap1	TP53 regulated inhibitor of apoptosis 1	1171,1317,1093	1433,1485,1302	0.425812	0.00360701
NM_016891.3	Ppp2r1a	protein phosphatase 2, regulatory subunit A, alpha	6756,7255,6646	8055,8383,7785	0.42515	0.000245192
NM_007383.3	Acads	acyl-Coenzyme A dehydrogenase, short chain	1479,1650,1409	1926,1757,1651	0.424704	0.00366269
NM_013795.5	Atp5l	ATP synthase, H+ transporting, mitochondrial F0 complex, subunit G	2534,3012,2341	3229,3166,2901	0.424017	0.00456426
NM_010176.4	Fah	fumarylacetoacetate hydrolase	364,443,374	415,513,470	0.423656	0.0127969
NM_133994.3	Gstt3	glutathione S-transferase, theta 3	298,372,324	383,400,391	0.423263	0.014624
NM_026684.2	Ndufb10	NADH dehydrogenase (ubiquinone) 1 beta subcomplex, 10	1525,1878,1490	1946,1946,1869	0.423058	0.00412935
NM_133925.2	Rbm28	RNA binding motif protein 28	1930,1979,1989	2102,2381,2420	0.422728	0.000142759
NM_016682.2	Uba2	ubiquitin-like modifier activating enzyme 2	742,849,722	964,934,820	0.422306	0.00710169
XM_006527939.2	Tbl1x	transducin (beta)-like 1 X-linked, transcript variant X1	1689,1700,1767	2011,1933,2076	0.422284	0.000216637
NM_016776.2	Mybbp1a	MYB binding protein (P160) 1a	4621,4328,4883	4937,5698,5505	0.422198	3.3e-05
NM_001127189.3	Gm13157	predicted gene 13157	1684,1838,1873	2051,2047,2206	0.421932	0.000269039
NM_026155.3	Ssr3	signal sequence receptor, gamma	6607,6295,6536	7407,7379,7880	0.420933	4.3e-05
XR_385201.3	Gm8465	predicted gene 8465	252,298,218	265,336,311	0.417175	0.0407302
NM_145437.2	Cd300ld	CD300 molecule like family member d	6395,5509,6093	6693,6975,7260	0.417004	8.44e-05
XM_011244235.2	Gm40892	predicted gene, 40892	1239,1744,1417	1439,2027,1729	0.41658	0.0148192
NM_153505.4	Nckap1l	NCK associated protein 1 like	4732,5231,4427	5821,5624,5356	0.416067	0.00170503
NM_032544.3	Gtpbp3	GTP binding protein 3	253,285,265	347,343,255	0.416058	0.0410147
NM_008206.2	H2-Oa	histocompatibility 2, O region alpha locus	274,391,273	353,395,364	0.415799	0.0435558
NM_024454.1	Rab21	RAB21, member RAS oncogene family	1371,1363,1364	1577,1543,1648	0.415344	0.000441442
NM_013528.3	Gfpt1	glutamine fructose-6-phosphate transaminase 1	1531,1132,1646	1539,1763,1709	0.415133	0.00355869
NM_023053.3	Twsg1	twisted gastrulation BMP signaling modulator 1	2398,2495,2615	2553,3211,2982	0.414663	0.000336262
XM_011244248.1	Gm40902	predicted gene, 40902	1184,1641,1219	1401,1846,1520	0.413519	0.017656
NM_001013769.1	Rsl1	regulator of sex limited protein 1	190,177,181	219,192,233	0.412303	0.044928
NM_025394.3	Tomm7	translocase of outer mitochondrial membrane 7 homolog (yeast)	1605,1925,1577	2032,2156,1776	0.411687	0.00673105
NM_007757.2	Cpox	coproporphyrinogen oxidase	765,681,699	720,880,902	0.411268	0.00339807
NM_009861.3	Cdc42	cell division cycle 42, transcript variant 1	11437,11923,10302	13531,12830,12775	0.41118	0.00123285
NM_146200.1	Eif3c	eukaryotic translation initiation factor 3, subunit C	7906,8011,8149	8943,9568,9362	0.410875	3.97e-05
NM_028431.2	Pmpcb	peptidase (mitochondrial processing) beta	1371,1498,1323	1624,1698,1552	0.40969	0.00201844
NM_173413.3	Rab8b	RAB8B, member RAS oncogene family	9673,8260,10052	10522,10495,11356	0.409459	0.000136109
NM_026911.3	Spcs1	signal peptidase complex subunit 1 homolog (S. cerevisiae)	1885,2224,1830	2395,2292,2222	0.40872	0.00422617
NM_009169.2	Shfm1	split hand/foot malformation (ectrodactyly) type 1	4509,5136,4324	5773,5416,5018	0.406874	0.00372902
XM_017321211.1	Tmem156	transmembrane protein 156, transcript variant X3	242,304,245	297,330,300	0.406352	0.0354577
NM_010185.4	Fcer1g	Fc receptor, IgE, high affinity I, gamma polypeptide	9428,10112,8033	11646,10497,9880	0.40572	0.00686887
NM_138584.2	Spg21	spastic paraplegia 21 homolog (human)	356,334,367	390,432,404	0.405164	0.00932546
XR_140685.5	Gm13237	predicted gene 13237	542,645,525	667,722,606	0.404497	0.0152523
NM_001284397.1	Gngt2	guanine nucleotide binding protein (G protein), gamma transducing activity polypeptide 2, transcript variant 4	279,301,254	339,334,300	0.404351	0.031715
NM_021556.3	Mrps30	mitochondrial ribosomal protein S30	770,862,772	940,886,959	0.404009	0.00444691
NM_019793.3	Tspan3	tetraspanin 3	1821,1806,1620	1983,2155,1935	0.403608	0.00192696
XR_873085.1	Gm6750	predicted gene 6750	170,174,184	190,230,197	0.403403	0.0485541
NM_197995.2	Arl16	ADP-ribosylation factor-like 16	276,274,296	338,338,305	0.403035	0.0202499
NM_029115.3	Ccdc181	coiled-coil domain containing 181	291,360,290	365,349,384	0.402985	0.0297983
NM_177846.3	Lcmt2	leucine carboxyl methyltransferase 2	450,460,452	562,543,472	0.402966	0.0125968
NM_029985.2	Lrrc42	leucine rich repeat containing 42	668,728,690	784,826,803	0.402895	0.00301809
NM_029100.2	Sepn1	selenoprotein N, 1	2885,2516,2602	2927,3167,3139	0.402869	0.0004353
NM_025335.3	Tmem167	transmembrane protein 167	1947,1786,1753	2175,2089,2063	0.402558	0.00133379
NM_009119.3	Sap18	Sin3-associated polypeptide 18	1984,2266,1912	2489,2368,2273	0.402412	0.00403683
NM_007452.2	Prdx3	peroxiredoxin 3	1714,1711,1572	1945,1941,1884	0.402348	0.00144272
NM_010219.3	Fkbp4	FK506 binding protein 4	2717,3089,2564	3273,3232,3184	0.401704	0.00288293
NM_027475.3	Ecd	ecdysoneless homolog (Drosophila)	1239,1299,1284	1413,1475,1517	0.400928	0.000694178
NM_033524.3	Spred1	sprouty protein with EVH-1 domain 1, related sequence, transcript variant 1	1691,1324,1585	1810,1759,1721	0.400698	0.00243661
NM_144918.2	Smyd5	SET and MYND domain containing 5	997,1000,1106	1142,1301,1130	0.400639	0.00145654
NM_026479.4	Zcchc10	zinc finger, CCHC domain containing 10	306,343,300	371,362,369	0.400632	0.021051
XR_869209.1	Gm9769	predicted pseudogene 9769	934,1080,1018	1204,1189,1104	0.400264	0.00389344
NM_025844.2	Chordc1	cysteine and histidine-rich domain (CHORD)-containing, zinc-binding protein 1	1368,1347,1364	1494,1561,1642	0.400101	0.000542943
NM_001012309.2	Nsrp1	nuclear speckle regulatory protein 1	852,937,844	1024,990,1024	0.399051	0.00381462
NM_026389.3	Poldip2	polymerase (DNA-directed), delta interacting protein 2	1234,1256,1199	1418,1455,1372	0.398148	0.00150857
NM_001025612.2	Snx22	sorting nexin 22	2023,2308,1950	2429,2550,2271	0.398064	0.00390905
NM_030678.3	Gys1	glycogen synthase 1, muscle	516,479,488	556,586,568	0.397992	0.00574018
NM_053072.3	Fgd6	FYVE, RhoGEF and PH domain containing 6	1667,1520,1864	1720,1918,2182	0.397847	0.00128145
NM_018858.2	Pebp1	phosphatidylethanolamine binding protein 1	3233,3625,3133	3933,3973,3609	0.397815	0.0026901
NM_053179.3	Nans	N-acetylneuraminic acid synthase (sialic acid synthase)	2137,2418,2040	2539,2631,2448	0.397676	0.00300753
NM_001105667.1	Dtymk	deoxythymidylate kinase, transcript variant 1	296,376,273	383,354,364	0.397082	0.0475316
NM_019805.4	Anapc7	anaphase promoting complex subunit 7	1472,1509,1417	1676,1781,1602	0.396824	0.00169944
NM_133940.3	Fbxl14	F-box and leucine-rich repeat protein 14	2051,2260,2150	2452,2490,2481	0.396724	0.000779942
NM_028019.3	Rnf135	ring finger protein 135	827,791,720	984,853,857	0.396556	0.0108571
NM_009702.3	Aqr	aquarius, transcript variant 1	401,416,376	464,450,464	0.396326	0.0138314
NM_016767.2	Batf	basic leucine zipper transcription factor, ATF-like	807,749,615	865,835,811	0.396011	0.0162277
NM_026007.4	Eef1g	eukaryotic translation elongation factor 1 gamma	14091,16790,14355	16617,18686,16973	0.395868	0.00177346
NM_007505.2	Atp5a1	ATP synthase, H+ transporting, mitochondrial F1 complex, alpha subunit 1	18060,18926,17606	20785,21302,20519	0.394571	0.000399705
NM_206534.1	Churc1	churchill domain containing 1	644,816,669	865,771,822	0.394244	0.0169631
NM_023464.2	Ssna1	Sjogren's syndrome nuclear autoantigen 1	1086,1290,1080	1405,1364,1211	0.393885	0.010594
NM_173443.3	Vcpip1	valosin containing protein (p97)/p47 complex interacting protein 1	2573,2115,3097	2766,2859,3278	0.393396	0.00471471
NR_015577.1	Ube2d-ps	ubiquitin-conjugating enzyme E2D, pseudogene	546,534,482	566,653,581	0.392217	0.0109441
XM_006496903.3	Itpkb	inositol 1,4,5-trisphosphate 3-kinase B, transcript variant X2	1368,1649,1352	1819,1672,1536	0.392007	0.0125177
NM_001145433.1	Smim20	small integral membrane protein 20	874,1115,840	1134,1108,1024	0.391735	0.0202993
NM_026178.2	Mmd	monocyte to macrophage differentiation-associated	337,413,346	396,467,404	0.390864	0.0280448
NM_207207.1	Mrps26	mitochondrial ribosomal protein S26	1550,1739,1466	1928,1965,1568	0.389516	0.0129775
NM_018773.2	Skap2	src family associated phosphoprotein 2	5532,5469,5478	6384,6067,6343	0.38927	0.000420164
NM_138675.3	Med9	mediator complex subunit 9	832,825,780	931,974,885	0.388748	0.00465685
XR_877690.1	Ms4a6c	membrane-spanning 4-domains, subfamily A, member 6C, transcript variant X2	609,815,753	808,864,827	0.388173	0.0134527
NM_025677.3	Tsen15	tRNA splicing endonuclease subunit 15	303,327,259	337,377,314	0.38815	0.0451724
NM_016802.5	Rhoa	ras homolog family member A, transcript variant 1	781,726,812	859,948,841	0.387994	0.00315965
NM_144491.2	Dph1	diphthamide biosynthesis 1	309,291,352	365,350,375	0.387977	0.0200896
NM_134052.2	Adi1	acireductone dioxygenase 1	1189,1326,1307	1431,1527,1406	0.387536	0.0021112
NM_011122.3	Plod1	procollagen-lysine, 2-oxoglutarate 5-dioxygenase 1	4879,4745,4824	5482,5432,5499	0.384935	0.000331456
NM_016843.3	Atxn10	ataxin 10	1886,1875,1760	2034,2193,2068	0.38463	0.00147435
NR_015476.1	1500011K16Rik	RIKEN cDNA 1500011K16 gene	523,595,453	667,610,529	0.384071	0.0425256
NM_016906.4	Sec61a1	Sec61 alpha 1 subunit (S. cerevisiae)	6383,5969,6052	6738,7173,7014	0.383826	0.000272322
XR_879129.1	Gm15210	predicted gene 15210	717,820,708	842,920,805	0.383686	0.0110924
NM_172716.4	Pcgf3	polycomb group ring finger 3	555,439,579	590,541,662	0.383595	0.0181658
NM_001026212.1	Ensa	endosulfine alpha, transcript variant 2	3446,3693,3444	3915,4077,4058	0.383489	0.000798361
NM_016860.1	Actr1a	ARP1 actin-related protein 1A, centractin alpha	4675,4666,4575	5148,5526,5142	0.383031	0.000482024
NM_177001.3	9130023H24Rik	RIKEN cDNA 9130023H24 gene	301,277,298	351,320,330	0.382897	0.0285542
NM_028128.1	Rfc5	replication factor C (activator 1) 5	529,631,522	637,635,654	0.382367	0.0171489
NM_008563.2	Mcm3	minichromosome maintenance complex component 3	1599,1677,1609	1713,2083,1773	0.382296	0.00280328
NM_172124.2	B3gat2	beta-1,3-glucuronyltransferase 2 (glucuronosyltransferase S)	344,368,322	383,436,367	0.382191	0.029743
NM_028292.2	Ppme1	protein phosphatase methylesterase 1	1226,1182,1131	1245,1399,1385	0.380475	0.00242922
NM_009873.3	Cdk6	cyclin-dependent kinase 6	1166,1012,1284	1171,1440,1318	0.379888	0.0037339
XR_382757.3	Gm32089	predicted gene, 32089	606,435,488	615,544,584	0.379821	0.0314264
NM_011631.1	Hsp90b1	heat shock protein 90, beta (Grp94), member 1	27310,29149,28107	32474,30716,32662	0.379433	0.000688717
NM_026792.3	Agpat5	1-acylglycerol-3-phosphate O-acyltransferase 5 (lysophosphatidic acid acyltransferase, epsilon)	691,709,603	793,798,694	0.378899	0.0186858
NM_008448.3	Kif5b	kinesin family member 5B	3392,2820,3896	3505,3722,4212	0.378531	0.00360701
NM_175318.4	Spty2d1	SPT2, Suppressor of Ty, domain containing 1 (S. cerevisiae)	1092,1062,1237	1162,1341,1340	0.378229	0.00181767
NM_026934.3	Zc3h15	zinc finger CCCH-type containing 15	1936,2241,2158	2364,2402,2417	0.377821	0.0020359
XM_011245001.2	Mtmr9	myotubularin related protein 9, transcript variant X1	575,463,601	590,628,641	0.377742	0.011095
NM_153117.2	9530068E07Rik	RIKEN cDNA 9530068E07 gene	6215,6087,5934	6949,6829,6856	0.377016	0.000725501
NM_031868.2	Ppp1ca	protein phosphatase 1, catalytic subunit, alpha isoform	10288,11818,10162	12450,12389,11832	0.37698	0.00328261
NR_130958.1	Brip1os	BRCA1 interacting protein C-terminal helicase 1, opposite strand, transcript variant 1	1309,1336,1437	1510,1546,1560	0.376873	0.00114095
NM_025841.4	Kdelr2	KDEL (Lys-Asp-Glu-Leu) endoplasmic reticulum protein retention receptor 2	1774,1892,1708	2105,2055,1934	0.376492	0.00444471
NM_134046.5	Cenpo	centromere protein O	261,289,261	308,311,307	0.376314	0.0385441
NM_026242.3	Mrfap1	Morf4 family associated protein 1	7447,8595,7241	9147,8708,8571	0.376015	0.00517486
NM_146108.2	Hibch	3-hydroxyisobutyryl-Coenzyme A hydrolase	336,352,354	383,401,400	0.3747	0.019493
NM_008057.3	Fzd7	frizzled class receptor 7	1744,1727,1998	1956,2110,2101	0.374125	0.000818564
NM_010926.5	Emc8	ER membrane protein complex subunit 8	1118,1121,1096	1272,1345,1156	0.373685	0.00537426
NM_028207.3	Dusp3	dual specificity phosphatase 3 (vaccinia virus phosphatase VH1-related)	1894,1576,2076	2034,1963,2251	0.373205	0.00420571
NM_001256055.1	Eif3j2	eukaryotic translation initiation factor 3, subunit J2	1068,1167,1070	1301,1255,1182	0.372443	0.00739894
NM_134020.1	Tmed4	transmembrane emp24 protein transport domain containing 4	1701,1967,1733	1991,2127,1995	0.371575	0.00482713
NM_144545.4	Eif3j1	eukaryotic translation initiation factor 3, subunit J1	1444,1495,1482	1643,1700,1644	0.371519	0.00178111
NR_002896.3	Snhg1	small nucleolar RNA host gene 1	664,876,659	806,885,816	0.371222	0.0316484
NM_024222.2	Stt3b	STT3, subunit of the oligosaccharyltransferase complex, homolog B (S. cerevisiae)	5186,4806,5193	5550,5706,5829	0.371063	0.000300491
XM_017313118.1	Gm2427	predicted gene 2427	1010,1040,1049	1072,1199,1227	0.369826	0.00272208
NM_133928.2	Chchd4	coiled-coil-helix-coiled-coil-helix domain containing 4	298,323,285	340,344,345	0.369238	0.0376592
NR_024078.1	Btbd19	BTB (POZ) domain containing 19	366,348,368	388,444,392	0.368554	0.0223489
NM_010885.5	Ndufa2	NADH dehydrogenase (ubiquinone) 1 alpha subcomplex, 2	2059,2399,1807	2452,2454,2200	0.368542	0.0211075
NM_019742.4	Tusc2	tumor suppressor candidate 2	1097,1114,994	1253,1200,1165	0.368473	0.00921556
NM_026742.4	Ndufaf4	NADH dehydrogenase (ubiquinone) 1 alpha subcomplex, assembly factor 4	437,467,419	520,470,507	0.367934	0.0254439
NM_011512.3	Surf4	surfeit gene 4	1982,2252,1787	2397,2299,2115	0.367769	0.0167981
NM_026360.3	Ddx47	DEAD (Asp-Glu-Ala-Asp) box polypeptide 47	1784,1917,1700	2101,2070,1919	0.367707	0.00665537
NM_001160330.1	Mocs3	molybdenum cofactor synthesis 3	378,406,366	452,481,371	0.367704	0.0450696
NM_019755.5	Plp2	proteolipid protein 2	2304,2904,2374	2670,3068,2847	0.367238	0.0110397
NM_026688.2	Ndufs3	NADH dehydrogenase (ubiquinone) Fe-S protein 3	1623,1886,1537	1996,1871,1834	0.367075	0.0140964
NM_001100109.1	Srp54b	signal recognition particle 54B	859,848,910	960,997,985	0.366991	0.00328323
NM_170760.3	U2af1l4	U2 small nuclear RNA auxiliary factor 1-like 4	671,732,624	794,817,674	0.36631	0.028786
NM_153152.3	2410015M20Rik	RIKEN cDNA 2410015M20 gene	1083,1413,1128	1396,1401,1302	0.366261	0.0227222
NM_029364.3	Gns	glucosamine (N-acetyl)-6-sulfatase	33377,30874,33425	35908,36805,37356	0.3662	0.000147432
NM_026890.2	Ngdn	neuroguidin, EIF4E binding protein	945,1199,1046	1170,1280,1152	0.365374	0.0149331
NM_025521.3	2310011J03Rik	RIKEN cDNA 2310011J03 gene	1429,1733,1422	1821,1827,1528	0.364924	0.0225194
NM_027342.1	Fam162a	family with sequence similarity 162, member A	487,550,465	540,650,512	0.364894	0.0354577
NM_145622.2	Zfp65	zinc finger protein 65	485,477,525	528,560,585	0.364811	0.0108369
NM_025983.3	Atp5e	ATP synthase, H+ transporting, mitochondrial F1 complex, epsilon subunit	2908,3425,2694	3490,3605,3091	0.363376	0.0182438
NM_021538.1	Cope	coatomer protein complex, subunit epsilon	2893,3479,2733	3592,3531,3147	0.363342	0.0189819
NM_001242368.1	F10	coagulation factor X, transcript variant 1	511,406,423	500,500,510	0.362775	0.0287206
NM_025680.4	Ctnnbl1	catenin, beta like 1	378,335,425	401,444,434	0.362748	0.0236438
NM_183256.3	Cox14	cytochrome c oxidase assembly protein 14	1030,1271,1102	1401,1275,1154	0.362736	0.0252925
NM_025423.2	1110059E24Rik	RIKEN cDNA 1110059E24 gene	970,1145,1006	1161,1167,1183	0.362196	0.0103872
NM_153525.5	Tmem41b	transmembrane protein 41B	1020,1000,934	1079,1148,1092	0.362036	0.00650165
NM_008850.2	Pitpna	phosphatidylinositol transfer protein, alpha	12964,12619,12071	14690,13880,13681	0.361588	0.00219371
NM_153151.3	Acat3	acetyl-Coenzyme A acetyltransferase 3	579,660,511	621,701,656	0.360081	0.032934
NM_153176.4	Spg7	spastic paraplegia 7 homolog (human)	2060,2391,2107	2501,2484,2369	0.359947	0.00747311
NM_009342.2	Dynlt1b	dynein light chain Tctex-type 1B	4124,4613,3931	4906,4745,4558	0.359413	0.00771511
NM_153119.3	Plekho2	pleckstrin homology domain containing, family O member 2	427,404,465	473,494,485	0.359365	0.0169031
NM_172400.3	Dnajc8	DnaJ heat shock protein family (Hsp40) member C8	3300,3843,3310	3995,4043,3687	0.359346	0.00839314
NM_033370.3	Copb1	coatomer protein complex, subunit beta 1	5011,4869,5053	5408,5589,5677	0.359319	0.000492145
NM_026642.2	Trmt12	tRNA methyltranferase 12	353,372,335	427,400,366	0.359175	0.0462404
NM_007896.3	Mapre1	microtubule-associated protein, RP/EB family, member 1	4648,4295,4591	4930,5100,5070	0.358604	0.000625315
NM_145630.2	Pdk3	pyruvate dehydrogenase kinase, isoenzyme 3	750,666,665	775,829,729	0.358525	0.0151767
NM_024177.3	Mrpl38	mitochondrial ribosomal protein L38	883,976,775	999,1048,917	0.357682	0.0272219
NM_030132.5	Utp23	UTP23 small subunit processome component	494,492,462	557,531,537	0.357466	0.0216269
NM_001039521.1	Rrn3	RRN3 RNA polymerase I transcription factor homolog (yeast)	1377,1314,1417	1470,1608,1502	0.356008	0.00236357
NM_025932.2	Syap1	synapse associated protein 1	1982,1970,1826	2170,2209,2072	0.355493	0.00535255
NM_025333.4	Sdhaf2	succinate dehydrogenase complex assembly factor 2	1314,1529,1436	1644,1592,1543	0.355071	0.00878733
NM_020022.2	Rfc2	replication factor C (activator 1) 2	1897,2278,1996	2394,2289,2216	0.354976	0.011816
NM_001081400.3	1810013L24Rik	RIKEN cDNA 1810013L24 gene	1998,1977,2073	2167,2326,2242	0.354777	0.00132966
NM_007393.5	Actb	actin, beta	128850,135126,126879	150337,150571,135396	0.354252	0.00316523
NM_198017.3	Fam175b	family with sequence similarity 175, member B	1790,1743,1677	1793,1970,2056	0.354243	0.00337947
NM_080557.2	Snx4	sorting nexin 4	2427,2469,2404	2564,2748,2827	0.353893	0.00175694
NM_009196.4	Slc16a1	solute carrier family 16 (monocarboxylic acid transporters), member 1	492,463,487	525,566,518	0.35231	0.018317
NM_013481.1	Bop1	block of proliferation 1	1499,1676,1528	1741,1899,1603	0.351464	0.0115739
NM_148952.1	E2f4	E2F transcription factor 4	2097,2321,2211	2426,2619,2331	0.350721	0.00520755
NM_178589.3	Tnfrsf21	tumor necrosis factor receptor superfamily, member 21	3363,2607,3021	3294,3517,3178	0.350719	0.00761557
NM_033618.3	Supt16	suppressor of Ty 16	3178,2993,3450	3385,3574,3701	0.349767	0.000943236
NM_010500.2	Ier5	immediate early response 5	3992,4650,3878	4698,4914,4368	0.349498	0.0122731
NM_021501.4	Pias4	protein inhibitor of activated STAT 4	1060,1105,1018	1167,1254,1127	0.349422	0.00990492
NM_007798.3	Ctsb	cathepsin B	70498,67629,74567	78441,80375,78434	0.348947	0.000253818
NM_133722.2	Abhd17c	abhydrolase domain containing 17C	1023,1094,999	1170,1163,1134	0.348851	0.0106285
NM_133735.2	Ptcd1	pentatricopeptide repeat domain 1	700,692,647	762,782,726	0.34843	0.0171269
NM_025317.2	Mrpl54	mitochondrial ribosomal protein L54	707,850,666	884,849,752	0.347927	0.0476658
NM_025578.4	Mrps25	mitochondrial ribosomal protein S25	1509,1730,1460	1777,1754,1694	0.346183	0.0157668
NM_008740.4	Nsf	N-ethylmaleimide sensitive fusion protein	3715,3271,3643	3716,4047,3995	0.346001	0.00141523
NM_025388.2	Ufc1	ubiquitin-fold modifier conjugating enzyme 1	1624,1952,1530	1982,1879,1829	0.345883	0.0278696
NM_008528.4	Blnk	B cell linker	5128,6381,5790	6335,6466,6380	0.344301	0.00862601
NM_011119.3	Pa2g4	proliferation-associated 2G4	3007,3336,2950	3345,3531,3428	0.343631	0.00621052
NM_001102565.1	Alkbh1	alkB homolog 1, histone H2A dioxygenase	507,516,502	560,579,553	0.343532	0.0217208
NM_001080769.1	Uhrf1bp1	UHRF1 (ICBP90) binding protein 1	1273,1121,1466	1411,1358,1486	0.342686	0.00998871
NM_019920.2	Lamtor3	late endosomal/lysosomal adaptor, MAPK and MTOR activator 3	2102,2434,2117	2516,2455,2400	0.342066	0.0125177
NM_027400.3	Lman1	lectin, mannose-binding, 1, transcript variant 1	1732,1833,1698	1968,1919,1929	0.340937	0.00755366
NM_016794.3	Vamp8	vesicle-associated membrane protein 8	4849,5205,4165	5680,5180,4897	0.340073	0.0275379
NM_146229.2	Dync1li1	dynein cytoplasmic 1 light intermediate chain 1	1610,1526,1599	1678,1847,1697	0.340014	0.00408741
[truncated: 1,580 more rows]
